# Supplementary material for: Dynamic m6A methylation facilitates mRNA triaging to stress granules
Source: Life Sci Alliance. 2018 Jul 3;1(4):e201800113. doi: 10.26508/lsa.201800113 (PMC6238392; doi:10.26508/lsa.201800113)
Supplement: Supplementary file 4 [file LSA-2018-00113_SdataF3.xlsx]

## Sheet: Fig 1E
m6A/A (all genes)			Median
Control	500 µM AS		Control	500 µM AS
0.2	0.5		0.222222	0.25
0.0666667	0.2
0.166667	0.0666667
0.333333	0.166667		p = 2.8x10-6	Mann-Whitney test
0.333333	0.111111
0.166667	0.2
0.166667	0.166667
0.333333	0.333333
0.2	0.2
0.2	0.25
0.0666667	0.2
0.333333	0.0666667
0.2	0.375
0.25	1
0.222222	0.5
0.333333	0.333333
0.0714286	0.111111
0.111111	0.25
0.0769231	0.111111
0.285714	0.0714286
0.0909091	0.0769231
0.2	0.1
0.5	0.142857
0.25	0.2
0.0434783	0.5
0.333333	0.166667
0.2	0.130435
0.222222	0.142857
0.222222	0.222222
0.142857	0.0714286
0.2	0.285714
0.142857	0.444444
0.333333	0.222222
0.0666667	0.2
0.142857	0.4
0.125	0.428571
0.166667	0.333333
0.333333	0.0666667
0.1875	0.0625
0.3125	0.333333
0.2	0.25
0.125	0.125
0.5	0.4
0.214286	0.166667
0.190476	0.142857
0.153846	0.375
0.263158	0.5
1	0.285714
0.4	0.238095
0.285714	0.153846
0.583333	0.263158
0.333333	0.25
0.428571	1
0.0714286	0.4
0.0714286	0.285714
0.5	0.583333
0.333333	0.2
0.0769231	0.428571
0.2	0.333333
0.25	0.142857
0.166667	0.285714
0.04	0.5
0.2	0.4
0.714286	0.142857
0.0909091	0.333333
0.181818	0.25
0.333333	0.166667
0.25	0.08
0.333333	0.2
0.285714	0.714286
0.285714	0.181818
0.0555556	0.181818
0.4	0.25
0.4	0.285714
0.333333	0.285714
0.5	0.333333
0.5	0.222222
0.111111	0.176471
0.666667	0.2
0.285714	0.5
0.5	0.25
0.333333	0.222222
0.1	0.666667
0.333333	0.428571
0.25	0.25
0.111111	0.125
0.2	0.333333
0.25	0.25
0.153846	0.333333
0.166667	0.3
0.444444	0.375
0.0588235	0.2
0.166667	0.230769
0.2	0.333333
0.428571	0.0588235
0.235294	0.111111
0.333333	0.2
0.25	0.285714
0.111111	0.235294
0.111111	0.333333
0.571429	0.222222
0.166667	0.111111
0.111111	0.333333
0.0666667	0.0909091
0.545455	0.571429
0.1	0.166667
0.0434783	0.25
0.142857	0.333333
0.166667	0.222222
0.3	0.454545
0.666667	0.1
0.25	0.166667
0.166667	0.166667
0.142857	0.2
0.4	0.166667
0.1	0.666667
0.333333	0.25
0.2	0.375
0.333333	0.125
0.333333	0.166667
0.105263	0.285714
0.25	0.2
0.3	0.5
0.125	0.5
0.25	0.2
0.333333	0.333333
0.5	0.2
0.111111	0.333333
0.125	0.333333
0.0833333	0.5
0.25	0.25
0.333333	0.2
0.1	0.333333
0.285714	0.3
0.333333	0.2
0.5	0.25
0.166667	0.666667
0.25	0.666667
0.2	0.166667
0.142857	0.125
0.285714	0.0833333
0.125	0.375
0.111111	0.5
0.5	0.5
0.0909091	0.125
0.333333	0.285714
0.333333	0.75
0.0714286	0.166667
0.0909091	0.25
0.166667	0.3
0.111111	0.285714
0.333333	0.142857
0.166667	0.125
0.1875	0.111111
0.125	0.5
0.25	0.227273
0.5	0.333333
0.1	0.555556
1	0.214286
0.2	0.0909091
0.1	0.166667
0.5	0.333333
0.2	0.333333
0.666667	0.111111
0.2	0.0869565
0.2	0.166667
0.2	0.125
0.384615	0.25
0.0909091	0.25
0.142857	0.1
0.0909091	1
0.5	0.2
0.0909091	0.2
0.181818	0.2
0.333333	0.333333
0.222222	0.333333
0.166667	0.2
0.166667	0.166667
0.125	0.307692
0.125	0.181818
0.5	0.333333
0.166667	0.142857
0.166667	0.5
0.266667	0.0909091
0.2	0.272727
1	0.333333
0.25	0.222222
1	0.166667
0.25	0.166667
0.2	0.125
0.333333	0.666667
0.333333	0.166667
0.5	0.233333
0.333333	0.111111
0.285714	0.2
0.2	0.25
0.0666667	1
0.0555556	0.25
0.142857	0.2
0.227273	0.5
1	1
0.5	0.142857
0.0833333	0.133333
0.5	0.142857
0.266667	0.111111
0.142857	0.142857
0.1	0.136364
0.5	0.5
0.125	0.0833333
0.125	0.4
0.5	0.142857
0.5	0.1
0.230769	0.125
0.571429	0.375
0.166667	0.5
0.333333	0.230769
0.1	0.714286
0.2	0.5
0.5	0.333333
0.0909091	0.333333
0.0909091	0.3
0.2	1
0.142857	0.5
0.25	0.181818
0.111111	0.0909091
0.181818	0.3
0.666667	0.428571
0.25	0.25
0.111111	0.111111
0.333333	0.181818
0.166667	0.285714
0.2	0.666667
0.25	0.5
0.5	0.25
0.333333	0.25
0.111111	0.222222
0.142857	0.333333
0.25	0.333333
0.142857	0.333333
0.2	0.2
1	0.25
0.285714	0.5
0.166667	0.166667
0.2	0.166667
1	0.222222
0.2	0.142857
0.25	0.25
0.0769231	0.142857
0.25	0.2
0.0909091	0.4
0.2	0.285714
0.230769	0.666667
0.25	0.2
0.5	1
0.666667	0.2
0.166667	0.25
0.25	0.142857
0.333333	0.0769231
0.25	0.25
0.117647	0.0909091
0.5	0.2
0.333333	0.230769
0.1	0.0833333
0.333333	0.25
0.166667	0.5
0.5	0.2
0.0833333	0.666667
0.2	0.166667
0.142857	0.25
0.269231	0.333333
0.5	0.2
0.142857	0.25
0.0666667	0.25
0.333333	0.176471
0.2	0.5
0.125	0.4
0.25	0.0769231
0.166667	0.2
0.333333	0.25
0.159091	0.2
0.111111	0.166667
0.1	0.0833333
0.714286	0.5
1	0.0833333
0.285714	0.2
0.2	0.285714
0.142857	0.115385
0.0833333	1
0.142857	0.2
0.2	0.333333
1	0.454545
0.0769231	0.125
1	0.25
0.5	0.166667
0.333333	0.333333
0.105263	0.0681818
0.25	0.25
0.111111	0.1
0.25	0.571429
0.125	1
0.142857	0.428571
0.2	0.4
0.2	0.0833333
0.142857	0.142857
0.5	0.5
0.428571	0.0769231
0.333333	1
0.333333	0.0714286
0.142857	0.5
0.166667	0.333333
1	0.368421
0.2	0.222222
0.25	0.375
0.4	0.125
0.333333	0.285714
0.25	1
0.0952381	0.2
0.25	0.142857
0.4	0.5
0.166667	0.428571
0.666667	0.166667
0.333333	0.166667
0.4	0.166667
0.2	1
0.333333	0.2
0.5	0.3
0.0588235	0.25
0.2	0.6
0.428571	0.333333
0.25	0.25
0.142857	0.142857
0.333333	0.333333
0.5	0.4
0.133333	0.166667
0.333333	0.2
0.0666667	0.666667
0.333333	0.5
0.25	0.25
0.333333	0.4
0.25	0.1
0.125	0.444444
0.125	0.0588235
0.2	0.6
0.111111	0.428571
0.2	0.25
0.5	0.25
0.111111	0.2
0.1	0.142857
0.166667	0.5
0.2	0.2
0.125	0.333333
0.4	0.25
0.125	0.0666667
1	0.333333
0.125	0.5
1	0.25
0.4	0.625
0.25	0.2
0.125	0.222222
0.333333	0.1
0.125	0.222222
0.25	0.333333
0.555556	0.0769231
0.333333	0.125
1	0.166667
0.285714	0.2
0.2	0.125
0.111111	0.1
0.272727	0.125
0.25	0.5
0.4	1
0.2	0.166667
0.15	0.2
0.0625	1
0.25	0.2
0.0909091	0.25
0.1	0.125
0.222222	0.166667
0.444444	0.25
0.333333	0.375
0.333333	0.333333
0.5	0.444444
0.111111	0.666667
0.25	0.333333
0.25	0.125
0.142857	1
0.125	0.285714
0.166667	0.3
0.666667	0.111111
0.5	0.363636
0.0526316	0.166667
0.0714286	0.125
0.2	0.4
0.184211	0.2
0.285714	0.2
0.285714	0.1875
0.333333	0.4
0.153846	0.0714286
0.5	0.222222
0.5	0.333333
0.32	0.666667
0.125	0.5
0.5	0.222222
0.111111	0.142857
0.222222	0.25
0.2	0.25
0.2	0.125
0.133333	1
0.333333	0.333333
0.142857	0.166667
0.166667	0.666667
0.25	0.5
0.166667	1
0.125	0.142857
0.333333	0.3
0.117647	0.3
0.153846	0.125
0.142857	0.210526
0.0555556	0.111111
0.333333	0.571429
0.2	0.142857
0.6	0.333333
0.05	0.153846
0.2	0.28
0.0714286	0.5
0.25	0.333333
0.0833333	0.125
0.142857	0.166667
0.25	0.5
0.333333	0.333333
0.333333	0.333333
0.0952381	0.2
0.2	0.2
0.8	0.2
0.0714286	0.333333
0.153846	0.133333
0.125	0.285714
0.333333	0.142857
0.0909091	0.166667
0.25	0.25
0.4375	0.25
0.15	0.272727
0.285714	0.0909091
0.25	0.0909091
0.166667	0.294118
0.1	0.307692
0.25	0.0714286
0.125	0.0555556
0.0454545	0.333333
0.571429	0.333333
0.333333	0.6
0.5	0.4
0.666667	0.35
0.125	0.166667
0.25	0.214286
0.142857	0.0833333
0.142857	0.142857
0.285714	0.25
1	0.333333
0.333333	0.333333
0.222222	0.166667
1	0.2
0.25	0.2
0.25	0.666667
0.25	0.6
0.666667	0.0714286
0.4	0.153846
0.25	0.25
0.25	0.222222
0.25	0.0909091
0.111111	0.25
0.2	0.4375
0.5	0.05
0.111111	0.285714
0.25	0.125
0.2	0.0588235
0.333333	0.333333
0.0555556	0.1
0.1	0.25
0.0769231	0.5
0.1	0.166667
0.111111	0.0454545
0.25	0.333333
0.142857	0.666667
0.25	0.5
0.25	0.111111
0.75	0.5
0.285714	0.666667
0.0769231	0.333333
0.0769231	0.375
0.5	0.375
0.166667	0.142857
0.25	0.142857
0.0769231	0.25
0.25	1
0.133333	0.142857
0.153846	0.142857
0.111111	1
0.2	0.2
0.333333	0.333333
0.4	1
0.25	0.25
0.555556	0.25
1	0.25
0.2	1
0.4	0.1
0.166667	0.2
0.142857	0.5
0.428571	0.111111
0.142857	0.25
0.222222	0.0555556
0.333333	0.2
0.285714	1
0.2	0.111111
0.333333	0.25
0.333333	0.166667
0.166667	0.333333
0.2	0.0555556
0.4	0.4
0.1	0.1
0.0909091	0.0769231
0.142857	0.25
0.333333	0.2
0.6	0.111111
0.4	0.25
0.25	0.0625
0.0714286	0.222222
0.333333	0.142857
0.5	0.25
0.142857	0.5
0.5	0.75
0.3	0.428571
0.428571	0.384615
0.142857	0.0769231
1	0.5
0.25	0.166667
0.125	0.0769231
0.2	0.125
0.2	0.133333
0.5	0.307692
0.1	0.2
0.5	0.4
0.0769231	0.25
0.0909091	0.444444
0.0909091	1
0.166667	0.2
0.125	0.4
0.1	0.333333
0.333333	0.142857
0.5	0.428571
0.0666667	0.25
0.2	0.222222
0.5	0.333333
0.5	0.142857
0.142857	0.6
0.142857	0.166667
0.294118	1
1	0.166667
0.125	0.2
0.142857	0.4
0.1	0.333333
0.133333	0.4
0.454545	0.2
0.125	0.25
0.125	0.333333
0.166667	0.333333
0.25	0.333333
1	0.666667
0.0625	0.142857
0.25	0.4
0.333333	0.125
0.0322581	1
0.1	0.5
0.125	0.1
0.25	0.166667
0.5	0.25
0.5	0.111111
0.0666667	0.571429
0.0714286	0.142857
0.2	1
0.0909091	0.25
0.222222	0.125
0.5	0.2
0.125	0.3
0.2	0.25
0.172414	0.333333
0.111111	0.5
0.1	0.5
1	0.0909091
0.6	0.272727
0.5	0.166667
0.166667	0.25
0.333333	0.1
0.25	0.5
1	0.230769
1	0.133333
0.111111	0.2
0.333333	0.5
0.5	0.111111
0.142857	0.5
0.238095	0.142857
0.25	0.142857
0.142857	0.235294
0.3	1
0.25	1
0.5	0.125
0.333333	0.142857
0.111111	0.285714
0.2	0.5
1	0.2
0.333333	0.133333
0.0588235	0.363636
0.142857	0.125
0.214286	0.125
0.6	0.166667
0.1	0.0625
0.2	0.5
0.4	0.333333
0.25	0.0322581
0.0731707	0.25
0.125	0.25
0.0666667	0.333333
0.181818	0.5
0.142857	0.5
0.1	0.0666667
0.125	0.6
0.1875	0.0909091
0.166667	0.222222
0.5	0.25
0.2	0.125
0.142857	0.1875
0.0666667	0.142857
0.25	0.482759
0.2	0.111111
0.2	0.1
0.333333	1
0.037037	0.6
0.228571	0.5
0.142857	0.166667
0.3	0.333333
0.125	0.25
0.25	1
0.333333	1
1	0.333333
0.25	0.5
0.454545	0.285714
0.4	0.142857
0.0714286	0.25
0.304348	0.2
0.181818	0.5
0.166667	0.25
0.444444	0.75
0.125	0.333333
0.230769	0.3
1	1
0.2	0.333333
0.2	0.0588235
0.3	0.142857
0.0666667	0.25
0.25	0.6
0.0666667	0.1
1	0.2
0.111111	0.5
0.333333	0.166667
0.4	0.0243902
0.142857	0.0625
0.2	0.0666667
0.5	0.0909091
0.166667	0.0714286
0.125	0.05
0.181818	0.291667
0.111111	0.1875
0.0769231	0.166667
0.333333	0.5
0.25	0.1
0.210526	0.142857
0.222222	0.0666667
0.0416667	0.25
0.333333	0.4
0.230769	0.5
0.4	0.111111
0.285714	0.0740741
0.333333	0.257143
0.0909091	0.238095
0.4	0.35
0.125	0.333333
0.05	1
0.1	0.125
0.25	0.454545
0.2	1
0.333333	0.4
0.25	0.125
0.21875	0.0833333
0.166667	0.1
0.0909091	0.326087
0.222222	0.181818
0.4	0.333333
0.166667	0.222222
0.333333	0.153846
0.1	0.2
0.0833333	0.0769231
0.206897	0.1
0.5	0.25
0.2	0.2
0.333333	0.666667
0.166667	0.181818
0.25	0.25
0.333333	0.111111
0.125	0.333333
0.05	0.6
1	0.0833333
0.0555556	0.25
0.4	0.2
0.111111	0.166667
0.0625	0.333333
0.142857	0.1
0.285714	0.125
0.8	0.272727
0.2	0.111111
0.5	0.1875
0.222222	0.2
0.105263	0.25
0.181818	0.333333
0.5	0.263158
0.333333	0.222222
0.125	0.0416667
0.25	0.153846
0.166667	0.142857
0.111111	0.166667
0.125	0.181818
0.2	0.125
0.0833333	0.15
0.333333	0.333333
0.111111	0.1
0.111111	0.25
0.047619	0.333333
0.333333	0.133333
0.047619	0.333333
0.125	0.25
0.285714	0.0555556
0.166667	0.666667
0.2	0.1875
0.333333	0.333333
0.333333	0.0909091
0.176471	0.222222
0.304348	0.6
0.4	0.166667
0.222222	0.666667
0.1	0.111111
0.5	0.0833333
0.166667	0.275862
0.05	0.5
0.5	0.2
1	0.5
0.0625	0.333333
0.333333	0.125
0.222222	0.166667
0.4	0.125
0.25	0.05
0.142857	1
0.125	0.4
0.333333	0.111111
0.285714	0.0625
0.0769231	0.142857
0.75	0.285714
0.75	0.8
0.222222	0.181818
0.2	0.142857
0.181818	0.133333
0.047619	0.2
0.2	0.5
0.25	0.555556
0.25	0.105263
0.222222	0.272727
0.2	0.333333
0.25	0.125
0.3	0.5
0.2	0.0833333
0.222222	0.4
0.1	0.111111
0.166667	0.2
0.375	0.333333
0.166667	0.111111
0.0454545	0.111111
0.0810811	0.2
0.2	0.5
0.176471	0.142857
0.176471	0.166667
0.0588235	0.222222
0.5	0.2
0.333333	0.333333
0.333333	0.666667
0.2	0.117647
0.2	0.130435
0.181818	0.4
0.333333	0.111111
0.25	0.3
0.333333	0.5
0.166667	0.166667
0.333333	0.5
0.0666667	0.05
0.111111	0.111111
0.285714	1
0.363636	0.125
0.2	0.333333
0.4	0.111111
0.0555556	0.4
0.5	0.25
0.4	0.142857
0.25	0.125
0.2	0.166667
0.05	0.333333
0.4	0.5
0.333333	0.285714
0.5	0.0769231
0.181818	0.75
1	0.5
0.166667	0.111111
0.5	0.333333
0.125	0.166667
0.0625	0.5
0.222222	0.181818
0.2	0.047619
0.0909091	0.181818
0.1	0.25
0.166667	0.2
0.75	0.2
0.333333	0.5
0.0833333	0.4
0.25	0.25
0.193548	0.222222
0.5	0.333333
0.181818	0.2
1	0.2
0.153846	1
0.375	0.166667
0.142857	0.5
0.0625	0.333333
0.25	0.0833333
0.0714286	0.0909091
0.111111	1
0.333333	0.216216
0.125	0.25
0.285714	0.2
0.545455	0.235294
0.5	0.0588235
0.0769231	0.117647
0.125	0.5
0.25	0.666667
0.333333	0.2
0.5	0.181818
0.105263	0.166667
1	0.5
0.75	0.333333
0.571429	0.25
0.166667	0.666667
0.125	0.555556
0.125	0.133333
0.142857	0.111111
0.2	0.285714
0.0769231	0.363636
0.333333	0.2
0.1875	0.25
0.030303	0.2
0.105263	0.111111
0.125	0.25
0.333333	0.5
0.0909091	0.8
0.125	0.0909091
0.4	0.25
0.666667	0.1
0.125	0.2
0.5	0.333333
0.25	0.5
0.2	0.181818
0.0909091	1
0.166667	0.5
0.4	1
0.333333	0.125
0.111111	0.1875
0.111111	0.15
0.166667	0.166667
1	0.2
0.166667	0.0909091
0.2	0.1
0.272727	0.166667
0.333333	0.5
0.25	0.666667
0.333333	0.166667
0.25	0.25
0.25	0.129032
0.5	0.5
0.181818	0.363636
0.5	0.5
0.428571	0.25
0.1	0.285714
0.4	0.0769231
0.315789	0.125
0.166667	0.142857
0.166667	0.25
0.2	0.125
0.5	0.111111
0.2	0.333333
0.142857	0.285714
0.333333	0.636364
0.0555556	0.5
0.333333	0.461538
0.333333	0.0666667
0.1	0.5
0.2	0.166667
0.166667	0.75
0.666667	0.210526
1	1
0.0769231	0.75
0.333333	0.111111
0.0714286	1
0.333333	0.25
0.666667	0.125
0.285714	0.125
0.230769	0.142857
0.2	0.2
0.166667	0.333333
0.5	0.125
0.5	0.375
0.166667	0.030303
0.0625	0.5
0.235294	0.105263
0.222222	0.333333
0.047619	0.0454545
0.166667	0.142857
0.142857	0.125
0.133333	0.4
0.5	0.333333
0.0666667	0.125
0.0714286	0.166667
0.1	0.464286
0.333333	0.2
0.5	0.0909091
1	0.333333
0.142857	0.2
0.25	0.333333
0.111111	0.222222
0.0344828	0.166667
0.166667	1
0.25	0.2
0.0625	0.222222
0.5	0.272727
0.666667	0.166667
0.166667	0.25
0.125	0.25
0.0666667	0.333333
0.2	0.25
0.222222	0.25
0.0833333	0.2
0.333333	0.125
0.333333	1
0.5	0.363636
0.466667	0.166667
0.2	0.428571
0.333333	0.1
0.111111	0.25
0.153846	0.4
0.5	0.25
0.333333	0.263158
0.214286	0.166667
0.0434783	0.166667
0.222222	0.1
0.333333	0.2
0.2	0.142857
0.125	0.2
0.384615	0.0555556
0.25	0.333333
0.333333	0.333333
0.333333	0.5
0.428571	0.666667
0.111111	1
0.333333	0.0769231
0.166667	0.166667
0.461538	0.333333
0.25	0.333333
0.6	0.666667
0.5	0.428571
0.25	0.153846
0.111111	0.0833333
0.4	0.1
0.5	0.25
0.0909091	0.166667
0.2	0.5
0.333333	0.5
0.166667	0.166667
1	0.0625
0.333333	0.176471
0.25	0.222222
0.4	0.166667
0.25	0.214286
0.142857	0.0666667
0.25	0.2
0.230769	0.333333
0.0909091	0.0666667
0.25	0.1
0.166667	0.333333
0.4	1
0.25	1
1	0.285714
0.1	1
0.25	0.1
0.2	0.111111
0.333333	0.1
0.0714286	0.103448
0.285714	0.333333
0.5	0.5
0.0833333	0.142857
0.166667	0.0909091
0.0909091	0.181818
0.2	0.125
1	0.333333
0.125	0.666667
0.210526	0.166667
0.5	0.125
0.4	0.0333333
0.2	0.333333
0.2	0.2
0.2	0.133333
0.285714	0.333333
0.0625	0.222222
0.111111	0.0833333
0.125	0.222222
0.166667	0.333333
0.25	0.166667
0.363636	0.5
0.2	0.533333
0.5	0.2
0.2	0.666667
0.333333	0.111111
0.5	0.346154
0.5	0.666667
0.666667	0.428571
0.181818	0.0434783
0.5	0.222222
0.25	0.0625
0.166667	0.333333
0.571429	0.6
0.0909091	0.125
0.25	0.384615
0.5	0.333333
0.0909091	0.388889
0.2	0.571429
0.25	1
0.285714	0.0555556
0.2	0.5
0.0909091	0.384615
0.05	0.125
0.5	0.2
0.166667	0.5
0.2	0.5
0.2	0.25
0.1	0.4
0.2	0.5
0.2	0.25
0.0588235	0.5
0.0666667	0.2
0.666667	0.333333
0.4	1
0.1	0.333333
0.4	0.25
0.0769231	0.4
0.333333	0.25
0.111111	0.142857
0.181818	0.5
0.2	0.153846
0.666667	0.0909091
0.444444	0.125
0.2	0.222222
0.5	0.25
0.190476	0.25
0.0909091	0.4
0.6	0.25
0.176471	1
0.25	0.1
0.0909091	0.333333
1	0.2
0.25	0.0714286
0.2	0.333333
0.0909091	0.166667
0.0909091	0.142857
0.166667	0.157895
0.176471	0.0833333
0.25	0.166667
0.2	0.0909091
0.1	0.1
0.1	1
0.166667	0.125
0.666667	0.166667
0.125	0.142857
0.2	0.333333
0.4	0.105263
0.1	0.5
0.166667	0.4
0.142857	0.2
0.1	0.3
0.0769231	0.428571
0.0714286	0.25
0.25	0.222222
0.047619	0.25
0.08	0.25
0.1	0.111111
0.230769	0.272727
0.333333	0.2
0.1	0.5
0.125	0.2
0.166667	0.5
0.111111	0.25
0.285714	0.666667
0.166667	0.5
0.25	0.363636
1	0.5
0.428571	0.333333
0.2	0.75
0.2	0.166667
0.2	0.428571
0.142857	0.333333
0.333333	0.0909091
0.2	0.25
0.333333	0.166667
0.142857	0.2
0.142857	0.166667
0.666667	0.571429
0.428571	0.4
0.5	0.0909091
0.2	0.2
0.166667	0.05
0.1	0.5
0.444444	1
0.333333	0.25
0.0909091	0.166667
0.2	0.2
0.25	0.4
0.2	0.1
0.0625	0.2
0.5	0.2
0.2	0.0666667
0.666667	0.666667
0.117647	0.4
0.2	0.1
0.5	0.4
0.6	0.333333
0.2	0.0555556
0.166667	0.0909091
0.666667	0.2
0.307692	0.142857
0.25	0.388889
0.0769231	0.2
0.0714286	0.5
1	0.190476
0.0333333	0.166667
0.047619	0.0909091
0.0909091	0.2
0.333333	0.294118
0.111111	0.25
0.166667	0.227273
0.333333	1
0.166667	0.2
0.5	0.142857
0.333333	0.4
0.142857	0.0454545
0.125	0.166667
0.0625	0.294118
0.5	0.25
0.5	0.2
0.666667	0.166667
0.0666667	0.666667
0.333333	0.125
0.222222	0.285714
0.125	0.2
0.142857	0.2
0.25	0.1
0.5	0.166667
1	0.333333
0.25	0.142857
0.5	0.1
0.2	0.461538
0.228571	0.3
0.333333	0.25
0.25	0.0714286
0.25	0.1875
0.5	0.333333
0.181818	0.16
0.571429	0.2
0.25	0.307692
0.2	0.1
0.0322581	0.2
0.166667	0.5
0.0357143	0.0869565
0.333333	0.1
0.047619	0.125
0.434783	0.166667
0.166667	0.166667
0.2	1
0.214286	0.571429
0.111111	0.5
0.25	0.4
0.333333	0.428571
0.333333	0.666667
0.25	0.4
0.0526316	0.333333
0.666667	0.142857
0.1875	0.666667
0.307692	0.571429
0.2	0.5
0.125	0.333333
0.571429	0.2
0.25	0.111111
1	0.444444
0.166667	0.0909091
0.2	0.333333
0.125	0.25
0.5	0.166667
0.333333	0.25
0.05	0.142857
0.2	0.5
0.333333	0.2
0.545455	0.666667
0.0909091	0.176471
0.583333	0.25
1	0.5
0.25	0.2
0.333333	0.166667
0.333333	0.666667
0.166667	0.307692
0.454545	0.25
0.166667	0.142857
0.111111	0.0769231
0.2	0.0714286
0.25	1
0.5	1
0.5	0.4
0.142857	0.125
0.285714	0.181818
1	0.333333
0.0769231	0.5
0.5	0.222222
0.5	0.166667
0.333333	0.333333
0.166667	0.166667
0.25	0.5
0.125	0.333333
0.25	0.2
0.3	0.1875
0.166667	0.166667
0.2	0.5
0.333333	0.666667
0.333333	0.2
0.285714	0.333333
0.0833333	0.142857
0.333333	0.25
0.0666667	0.5
0.25	0.2
0.142857	0.142857
0.4	0.75
0.142857	0.5
0.333333	0.25
0.181818	0.25
0.133333	0.114286
0.666667	0.555556
0.111111	0.5
0.0333333	0.117647
0.238095	1
0.223881	0.181818
0.333333	0.285714
0.4	0.1
0.176471	0.333333
0.75	0.25
0.5	0.2
0.0833333	0.333333
0.1	0.0714286
0.111111	0.333333
0.117647	0.1
0.125	0.222222
0.25	0.142857
0.333333	0.142857
0.142857	0.434783
0.04	0.166667
0.0810811	0.2
0.5	0.214286
0.0909091	0.555556
0.333333	0.25
0.0666667	0.333333
0.666667	1
0.5	0.666667
0.142857	0.25
0.0833333	0.307692
0.6	0.2
0.307692	0.0625
0.285714	0.285714
0.5	1
0.125	0.333333
0.25	0.2
0.1	0.166667
0.111111	0.2
0.166667	0.5
0.333333	0.111111
0.333333	0.05
0.210526	0.2
0.333333	0.333333
0.357143	0.454545
0.25	0.0833333
0.4	1
0.428571	0.25
0.2	0.333333
0.333333	0.333333
0.111111	0.2
0.25	0.25
0.5	0.333333
0.0555556	0.181818
0.125	0.666667
1	0.444444
1	0.2
0.0588235	0.333333
0.666667	0.5
0.0833333	0.25
0.3125	0.5
0.0833333	0.5
0.166667	0.142857
0.142857	0.142857
0.166667	1
0.111111	0.111111
0.166667	0.5
0.4	0.666667
0.0769231	0.625
0.3	0.5625
1	0.1
0.1	0.2
0.25	0.333333
0.352941	0.166667
0.0384615	0.333333
0.0714286	0.428571
0.5	0.0555556
0.285714	0.333333
0.5	0.0666667
0.333333	0.25
0.166667	0.142857
0.25	0.111111
0.5	0.4
0.333333	0.285714
0.333333	0.333333
0.166667	0.318182
0.363636	0.3
0.266667	0.133333
0.166667	0.416667
0.25	0.111111
0.25	0.380952
0.166667	0.0769231
0.333333	0.2
0.833333	0.253731
0.333333	0.333333
0.428571	0.4
0.142857	0.176471
0.2	0.75
0.428571	0.5
0.125	0.111111
0.25	0.4
0.142857	0.176471
0.1	0.125
0.4	0.25
0.6	0.166667
0.2	0.142857
0.333333	0.25
0.222222	0.04
0.133333	0.0810811
1	0.5
0.625	0.0909091
0.666667	0.166667
0.2	0.133333
0.176471	1
0.333333	0.375
0.5	0.0833333
0.105263	0.142857
0.0625	0.166667
0.0333333	0.25
0.1875	0.0833333
0.5	0.25
0.375	0.6
0.2	0.307692
1	0.285714
0.5	0.5
0.111111	0.1
0.178571	0.4
0.5	0.3
0.0909091	0.375
0.166667	0.25
1	0.2
1	0.111111
0.166667	0.25
0.0909091	0.25
0.6	0.111111
1	0.416667
0.0714286	0.157895
0.25	0.333333
0.5	0.5
0.25	0.25
0.285714	0.4
0.25	0.285714
0.285714	0.2
0.5	0.5
0.5	0.25
0.0625	0.5
0.3125	0.125
0.2	1
0.285714	1
0.25	0.125
0.375	0.5
0.142857	0.4
0.0909091	0.5
0.2	0.333333
0.136364	0.555556
0.151515	0.0833333
0.136364	0.25
0.0909091	0.166667
0.0909091	0.142857
0.166667	0.111111
0.333333	0.166667
0.25	0.111111
0.142857	0.222222
0.0714286	0.2
0.5	0.0769231
0.666667	0.4
0.0625	1
0.125	0.25
0.25	0.15
0.25	0.5
0.428571	0.2
0.0833333	0.181818
0.25	0.352941
0.692308	0.142857
0.4	0.181818
0.4	0.25
0.5	0.142857
0.0666667	0.5
0.333333	0.833333
0.153846	0.142857
0.5	0.75
0.2	0.5
0.285714	0.0714286
0.1	0.181818
0.2	0.333333
0.25	0.166667
0.25	0.4
0.375	0.333333
0.555556	0.181818
0.0833333	0.133333
0.333333	0.166667
0.625	0.125
0.111111	0.25
0.125	0.333333
0.166667	0.333333
0.266667	0.333333
0.0714286	1
0.2	0.333333
0.5	0.571429
0.333333	0.12
0.6	0.428571
0.4	0.6
0.5	0.428571
0.0512821	0.25
0.235294	0.142857
0.2	0.125
0.333333	0.2
0.25	0.166667
0.0666667	0.4
0.0666667	0.133333
0.285714	0.2
0.125	0.333333
0.285714	0.222222
0.142857	0.133333
0.111111	1
1	0.75
0.5	0.25
0.25	0.333333
0.133333	0.555556
0.115385	0.2
0.285714	0.294118
0.142857	0.5
0.333333	0.333333
0.4	0.5
0.25	0.5
0.5	0.333333
0.0833333	0.105263
0.333333	0.375
0.230769	0.142857
0.142857	0.111111
0.5	0.25
0.111111	0.125
0.375	0.5
0.125	0.375
0.142857	0.5
0.2	0.2
0.142857	0.333333
0.125	0.333333
0.3	0.111111
0.2	0.25
0.285714	0.2
0.333333	0.142857
0.285714	0.125
0.333333	0.5
0.142857	0.181818
0.111111	0.166667
0.583333	0.142857
0.0625	1
0.0769231	0.333333
0.222222	0.272727
0.5	0.166667
0.142857	1
0.25	0.428571
0.333333	0.0714286
0.142857	0.571429
0.285714	0.25
0.181818	0.214286
0.166667	0.25
0.4	0.5
0.166667	0.25
0.0833333	0.142857
0.0555556	0.25
0.0384615	0.142857
0.0909091	0.125
0.1	0.25
0.25	0.1
0.166667	0.125
0.0588235	0.125
0.0526316	0.2
0.181818	0.285714
0.333333	0.111111
0.5	0.25
0.5	0.285714
0.142857	0.166667
0.5	0.0909091
0.0357143	0.166667
0.333333	0.0454545
0.363636	0.030303
0.0588235	0.0909091
0.333333	0.2
0.0666667	0.0909091
0.333333	0.2
0.111111	0.0909091
0.166667	0.333333
0.25	0.5
0.0833333	0.0454545
0.4	0.142857
0.25	0.1
0.571429	0.5
0.2	0.666667
0.142857	0.0625
0.25	0.333333
0.0909091	0.333333
0.333333	0.125
0.2	0.142857
0.5	0.25
0.333333	0.25
0.166667	0.428571
0.25	0.125
0.25	0.285714
0.285714	0.25
0.181818	0.538462
0.25	0.4
0.222222	0.5
0.2	0.133333
0.6	0.153846
0.166667	0.5
0.2	0.4
0.1	0.1
0.142857	0.428571
0.5	0.1
0.0833333	0.142857
0.125	0.2
0.5	0.25
0.111111	0.0666667
0.357143	0.5
0.272727	0.125
0.142857	0.666667
0.444444	0.0833333
0.25	0.166667
0.2	0.625
0.153846	0.111111
0.25	0.125
0.6	0.2
0.333333	0.0714286
0.333333	0.6
0.166667	0.5
0.307692	0.333333
0.25	0.222222
0.166667	0.6
0.285714	0.2
1	0.5
0.0833333	0.128205
0.333333	0.235294
0.133333	0.266667
0.047619	0.25
0.25	0.533333
0.333333	0.0588235
0.142857	0.142857
0.2	0.5
0.111111	0.125
0.5	0.285714
0.2	0.333333
0.2	0.214286
0.142857	1
0.333333	0.5
0.5	0.25
0.333333	0.0666667
0.2	0.0384615
0.333333	0.25
0.25	0.285714
0.333333	0.428571
0.115385	0.166667
0.111111	0.333333
0.153846	0.4
0.333333	0.125
0.142857	0.166667
0.363636	0.25
0.272727	0.0833333
0.25	0.333333
0.428571	0.153846
0.666667	0.2
0.4	0.142857
0.166667	0.5
0.0869565	0.125
0.111111	0.125
0.2	0.142857
0.5	0.2
0.190476	0.25
0.285714	0.4
0.25	0.3
0.5	0.285714
0.428571	0.222222
0.0909091	0.153846
0.05	0.142857
0.2	0.666667
0.333333	0.142857
0.111111	0.125
0.333333	0.222222
0.166667	0.583333
0.272727	0.166667
0.111111	0.1875
0.125	0.0769231
0.4	0.555556
0.5	0.142857
0.166667	0.142857
0.5	0.166667
0.1	0.166667
0.2	0.333333
0.2	0.142857
0.333333	0.214286
0.388889	0.181818
0.166667	0.25
0.166667	0.166667
0.105263	0.3
0.142857	0.4
0.0588235	0.166667
0.25	0.166667
0.2	0.166667
0.333333	0.115385
0.222222	0.2
0.25	0.0909091
0.166667	0.2
0.333333	0.1
0.4	0.25
0.0714286	0.0588235
0.333333	0.666667
0.2	0.105263
0.377778	0.5
0.428571	0.181818
0.181818	0.166667
0.6	0.5
0.285714	0.5
0.4	0.142857
0.111111	0.5
0.25	0.2
0.222222	0.333333
0.2	0.5
0.25	0.272727
0.111111	0.117647
0.166667	0.333333
0.25	0.5
0.333333	0.2
0.333333	0.142857
0.166667	1
0.166667	0.25
0.1	0.333333
0.333333	0.111111
0.0833333	0.166667
0.4	0.375
0.166667	0.0833333
0.2	0.4
0.111111	0.142857
0.75	0.166667
0.5	0.6
0.111111	0.25
0.333333	0.285714
0.0588235	0.25
0.133333	1
0.0869565	0.181818
0.466667	0.333333
0.1	0.285714
0.333333	0.1
0.2	0.5
0.0909091	0.333333
0.5	0.2
0.166667	0.166667
0.0833333	0.25
0.5	0.25
0.285714	0.25
0.0833333	0.153846
0.125	0.166667
0.111111	0.277778
0.333333	0.2
0.208333	0.6
0.153846	0.0833333
0.5	0.166667
0.25	0.2
0.166667	1
0.25	1
0.25	0.25
0.111111	0.25
1	0.625
0.111111	0.166667
0.111111	0.6
0.142857	0.166667
0.230769	0.111111
0.4	0.357143
0.0714286	0.272727
0.8	0.125
0.235294	0.333333
0.333333	0.25
0.666667	0.2
0.5	0.0769231
0.117647	0.25
0.333333	0.6
0.6	0.166667
0.142857	0.5
0.125	0.333333
0.2	0.333333
0.333333	0.0833333
0.0666667	0.5
0.0909091	0.166667
0.428571	0.142857
0.166667	0.25
0.454545	0.133333
0.4	0.2
0.173913	0.0952381
0.333333	0.5
0.0416667	0.2
0.5	0.444444
0.2	0.142857
0.444444	0.2
0.0416667	0.111111
0.285714	0.166667
0.857143	0.2
0.333333	0.2
0.5	0.285714
0.333333	0.285714
0.222222	0.2
0.333333	0.333333
0.380952	0.4
0.25	0.333333
0.25	0.333333
0.0625	0.153846
0.307692	0.125
0.333333	1
0.25	0.115385
0.125	0.0769231
0.2	0.133333
0.1	0.333333
0.047619	0.428571
0.25	0.4
0.470588	0.285714
0.117647	0.0909091
0.5	0.545455
0.1	0.272727
0.222222	0.125
0.166667	0.25
0.111111	0.142857
0.2	0.666667
0.25	0.4
0.2	0.166667
0.333333	0.222222
0.25	0.0666667
0.333333	0.333333
1	0.142857
0.5	0.333333
0.333333	0.571429
0.166667	0.25
0.25	0.285714
0.5	0.2
0.16129	0.111111
0.111111	0.666667
0.2	0.166667
0.222222	0.0555556
0.0588235	0.125
0.0909091	0.4
0.1	0.333333
0.5	0.166667
0.333333	0.5
0.222222	0.1
0.0769231	0.2
0.25	0.2
0.166667	0.333333
0.2	0.388889
0.285714	0.166667
0.5	0.166667
0.111111	0.285714
0.25	0.142857
0.428571	0.117647
0.5	0.25
1	0.2
0.0909091	0.333333
0.4	0.185185
0.4	0.111111
0.3	0.333333
0.1	0.166667
0.157895	0.1
0.2	0.333333
0.222222	0.5
0.333333	0.4
0.111111	0.0714286
0.4	0.333333
0.4	0.6
0.333333	0.311111
0.333333	0.428571
0.2	0.181818
0.142857	0.125
0.333333	0.4
0.0952381	0.285714
0.125	0.333333
0.25	0.4
1	0.4
0.2	0.125
0.555556	0.111111
0.352941	0.222222
1	0.109091
0.333333	0.25
0.142857	0.25
0.333333	0.363636
0.25	0.25
0.1	0.4
0.4	0.2
0.1	0.333333
1	0.166667
0.666667	1
0.411765	0.166667
0.5	0.0666667
0.15	0.333333
0.142857	0.1
0.285714	0.333333
0.333333	0.333333
0.125	0.2
0.571429	0.166667
0.333333	0.111111
0.142857	0.625
0.2	0.3
0.166667	0.111111
0.0909091	0.333333
0.5	0.0588235
0.285714	0.4
0.1	0.266667
0.166667	0.1
0.0909091	0.125
0.142857	0.333333
0.777778	0.272727
0.25	0.5
0.25	0.166667
0.5	0.0833333
0.142857	0.5
0.0314961	0.285714
0.142857	0.0769231
0.375	0.2
0.333333	0.0833333
0.25	0.125
0.166667	0.111111
0.5	0.666667
0.2	0.166667
0.25	0.0769231
0.333333	0.0769231
0.5	0.208333
0.25	0.25
0.148148	0.25
0.5	0.111111
0.166667	1
0.166667	0.333333
0.0666667	0.222222
1	1
0.5	0.230769
0.222222	0.6
0.363636	1
0.4	0.352941
0.166667	0.25
0.333333	0.333333
0.285714	0.333333
0.142857	0.2
0.222222	0.666667
0.4	0.5
0.166667	0.0588235
0.0909091	0.333333
0.333333	0.2
0.2	0.5
0.117647	0.142857
0.0294118	0.125
0.6	0.5
0.5	0.428571
0.111111	0.125
0.285714	0.166667
0.2	0.3
0.333333	0.25
1	0.5
0.0833333	0.454545
0.111111	0.333333
0.125	0.2
0.105263	0.4
0.230769	0.130435
0.5	0.25
0.142857	1
0.5	0.0833333
0.166667	0.25
0.444444	0.4
0.666667	0.444444
0.285714	0.5
0.0769231	0.0416667
0.333333	0.2
0.166667	0.0714286
0.285714	0.571429
0.2	0.333333
0.333333	0.5
0.5	0.222222
0.5	0.285714
0.333333	0.25
0.5	0.375
0.2	0.0625
0.230769	0.384615
0.142857	0.285714
0.285714	0.125
0.5	0.333333
0.333333	0.25
0.571429	0.25
0.285714	0.2
0.333333	0.1
0.047619	0.166667
0.714286	1
0.142857	0.294118
0.1	0.333333
0.166667	0.5
0.133333	0.1
0.142857	0.222222
0.153846	0.0909091
0.4	0.166667
0.285714	0.2
0.25	0.25
0.0526316	0.666667
1	0.2
1	0.833333
0.352941	0.25
0.25	0.333333
0.166667	0.125
0.111111	0.6
0.5	0.111111
0.153846	0.4
0.25	0.75
0.333333	0.2
0.142857	0.666667
0.153846	0.193548
1	0.111111
0.1	0.0769231
0.25	0.2
0.153846	0.222222
0.166667	0.117647
0.285714	0.0909091
0.0625	0.25
0.333333	0.222222
0.181818	0.4
0.142857	0.25
0.5	0.333333
1	0.333333
0.125	0.333333
0.5	0.428571
0.1	0.5
0.2	0.111111
0.166667	0.1
0.0588235	0.25
0.125	0.142857
0.166667	0.6
0.1875	0.125
0.230769	1
0.2	0.0909091
0.166667	0.333333
0.125	0.111111
0.25	0.6
0.285714	0.2
0.153846	0.1
0.5	0.157895
0.25	0.111111
0.285714	0.166667
[truncated: 2,869 more rows]
