# Supplementary material for: Dynamic m6A methylation facilitates mRNA triaging to stress granules
Source: Life Sci Alliance. 2018 Jul 3;1(4):e201800113. doi: 10.26508/lsa.201800113 (PMC6238392; doi:10.26508/lsa.201800113)
Supplement: Supplementary file 6 [file LSA-2018-00113_SdataF5.xlsx]

## Sheet: Figure S3E
Total mRNA (RNA-seq)
Control log2 (RPKM)	200 µM AS log2 (RPKM)
5.17513	5.34209				R²= 0.992	Pearson correlation coefficient 200 µM AS vs control
5.56533	5.28669
2.34383	2.01817
4.0351	4.12963
6.12661	6.09611
4.04293	3.16674
2.32784	1.74542
2.66533	2.91598
4.2494	3.87643
6.28903	6.02798
1.90374	2.06128
1.22603	0.840682
2.95221	2.48774
3.42364	3.28015
2.42594	1.50195
2.93728	2.67325
5.94622	6.02071
4.58198	4.30758
3.88102	3.64625
4.78702	4.68506
5.06066	4.7808
4.35073	4.34261
6.48236	6.15793
2.36516	1.66357
1.46407	0.686712
3.24559	2.93974
2.46274	1.76287
1.57367	0.378698
2.62757	2.11862
1.21614	0.521247
3.19881	3.17217
4.75071	4.6325
1.83471	1.40285
4.29497	3.73713
7.65965	7.61519
3.57794	2.89672
7.28072	7.31083
2.23899	1.66589
5.61632	5.84813
8.20718	8.17633
7.00217	6.6526
3.95542	3.22099
3.98017	3.58053
3.74649	2.76497
2.81422	1.89581
0.397309	0.269453
8.3052	8.42106
5.29073	5.20119
4.3817	4.38424
3.58813	3.15021
3.70054	3.26108
5.21104	5.0785
5.74053	5.0415
2.90223	1.8663
7.91071	7.98741
5.43633	5.45011
4.81406	4.0507
3.42648	3.61056
4.5387	3.69593
5.27196	4.66493
3.6557	2.79189
3.59035	3.29768
5.52444	5.58997
4.34967	3.92531
3.50932	3.00037
2.79519	2.22192
3.16717	2.97876
4.92836	5.07973
2.1179	1.08468
1.59246	0.739715
4.71472	4.4313
1.96573	1.79835
4.14676	3.20293
2.32635	1.85692
2.94293	1.66024
3.89253	3.59925
3.62976	3.55972
1.66911	1.472
2.71872	1.98667
4.95633	4.56011
3.7775	3.13151
6.0257	6.00005
5.67431	5.4639
1.64344	1.20008
1.53994	1.63646
4.95617	4.7903
2.28489	1.91193
3.786	3.52999
4.58274	4.02788
1.35331	1.39538
5.16103	5.01956
3.26727	3.1317
4.26056	4.75635
1.06286	0.726421
1.38467	0.116401
2.72866	2.61319
4.30819	4.0615
2.00106	1.39362
2.00992	1.41456
4.59097	4.33758
2.69552	1.84068
3.48131	3.07329
4.41198	4.40221
2.24804	1.24704
5.38405	5.42251
3.22545	3.21748
2.65987	2.55116
7.12024	6.92931
3.66458	2.68134
2.64941	2.15211
6.39856	6.28103
3.24531	2.57688
4.33105	4.05119
0.932689	0.389796
2.87296	2.68852
7.03937	7.02717
4.80251	4.20517
1.26865	0.713475
6.44095	5.8714
4.38934	4.0226
4.67702	4.67126
3.5087	3.28981
2.74319	2.00099
5.81094	5.92118
1.62475	0.903863
5.77345	5.82885
6.67905	6.59462
4.99855	4.85276
2.09319	1.04466
1.8367	1.78857
5.98698	5.8124
3.66641	3.14144
4.40774	3.97751
8.6611	8.80854
3.88512	2.55457
5.72521	5.37808
3.23886	2.41844
1.82128	1.23531
4.60646	4.1216
2.33176	1.98681
5.20239	4.27623
1.18345	0.188988
3.21801	3.10193
3.53832	3.72478
3.48966	3.28305
4.60298	4.66298
3.51217	2.94365
2.07749	1.15127
1.67135	0.64929
2.1081	1.62088
5.21005	5.08192
5.73247	5.52929
2.60827	2.33583
2.63383	1.94946
3.32633	2.98137
7.4298	7.41817
7.68235	7.23955
5.6095	5.00023
1.99508	0.755487
3.16592	3.01851
3.34628	3.35228
4.54301	4.17004
4.89786	3.81314
4.35574	4.13387
4.72152	4.28027
4.98761	4.61771
3.75247	3.70881
5.47044	5.34605
7.72711	7.89142
5.09621	4.87863
6.02139	5.75294
6.46084	6.12286
4.42019	4.351
4.42886	4.03335
5.47553	5.31396
1.45389	1.78136
4.42332	4.22147
2.45704	1.87762
4.52625	4.14582
5.62283	5.19581
5.51685	4.8927
3.61232	3.41993
1.05317	0.91237
1.75469	1.4264
3.25639	2.42399
2.74344	1.68341
3.87358	3.54036
4.61535	4.57058
3.71001	3.52721
2.21388	2.04784
5.9326	5.96776
2.56634	2.16261
5.92205	5.74475
4.04684	3.45642
4.73826	4.59058
7.65905	7.51938
4.48575	4.05551
4.62734	4.06144
2.51022	1.50922
3.39798	2.99259
3.92658	3.41319
2.94487	2.76187
3.0801	2.31856
4.32848	4.18169
7.10109	7.06262
2.98172	2.33888
2.1106	1.67776
2.72624	1.97476
3.49458	2.37788
5.71364	5.81461
1.96385	0.901587
2.07145	1.66371
5.02614	4.16047
5.60933	5.14534
3.31446	2.96112
5.08325	4.64929
2.94119	2.10355
2.10849	0.995286
8.39864	8.5066
1.93602	1.96039
7.01625	6.96628
0.612645	0.381696
5.21479	4.75936
5.06057	4.55296
2.61528	2.21678
3.77565	3.36769
3.36544	2.70124
4.03335	3.2336
4.65143	4.33986
4.28456	4.43766
2.85451	2.44559
3.4212	2.84436
2.0316	1.97745
5.18176	5.13637
2.83108	1.94353
5.00206	4.97887
2.06075	1.41095
4.97222	4.66636
6.69394	6.69056
4.53155	4.28239
5.5107	5.14377
3.37547	1.61341
3.37661	3.41868
4.06503	3.63242
6.38238	6.56594
6.73158	6.40453
4.65237	4.28978
5.93784	5.47843
2.57168	1.74248
1.57533	0.880431
4.24107	4.02976
3.98844	3.39405
1.69704	0.915985
3.21306	2.39365
3.10123	2.43165
2.10482	1.44062
2.37276	1.65583
3.97002	3.62962
4.06655	4.03365
3.88219	3.86285
1.2436	1.17019
2.15224	1.7111
4.416	3.99583
4.93005	4.78991
2.0293	1.51717
2.92703	2.614
4.15608	4.21043
2.56119	1.81185
2.27178	2.10234
3.36888	2.19163
0.439723	0.2594
3.82402	3.3186
2.63024	2.37686
2.53235	2.04835
3.82506	3.19743
2.00067	1.17203
6.80111	6.51416
6.70596	6.73831
2.12779	1.66896
6.20104	6.14841
4.01817	3.49771
4.38288	3.87504
1.44235	1.14562
6.78002	6.78817
5.68563	5.52535
2.83163	2.05885
3.83436	3.74127
4.24648	4.22569
2.26455	0.992109
4.69865	4.34145
2.20354	1.32362
4.88815	4.72931
5.64581	5.42185
4.72043	4.35792
4.48152	4.14507
3.66867	2.85542
2.91599	2.20248
3.8167	3.6305
4.88487	4.53282
4.36146	3.89071
3.64028	2.90166
1.57077	0.750342
2.99677	3.12738
0.799327	1.71587
6.35567	6.24938
6.13121	6.04546
2.13707	1.27732
5.44924	5.00358
9.56317	9.482
0.678412	0.448677
2.29845	1.91167
3.68646	3.70777
2.74419	2.35132
3.74983	3.4464
3.6108	3.66839
3.70368	2.96487
4.14705	3.90396
4.40371	4.68905
2.32338	2.16515
4.10145	3.64482
4.65301	4.26641
4.34854	4.1712
4.35787	4.28891
3.95166	3.53429
5.08238	4.22543
4.26087	3.62256
3.85047	3.52217
5.14326	4.55161
3.33959	3.44725
4.18048	3.61126
3.2284	3.2357
5.7138	5.61136
2.77483	2.71582
3.07605	2.92548
7.21731	7.06649
5.30176	5.04076
0.784973	0.0039203
4.76456	5.05551
2.53284	2.3932
1.6879	1.067
4.19905	4.27265
3.57543	3.32351
6.2726	6.04413
4.75589	4.21136
3.11768	2.54036
3.37624	2.73026
1.24376	0.721932
4.54334	3.96526
2.69809	2.22559
2.66851	2.04265
4.59332	4.36331
4.09567	3.22655
8.39696	8.38775
2.38315	1.78367
2.07519	1.81918
3.95666	3.64118
6.52602	6.33622
4.1904	4.45703
5.71376	5.13328
4.60281	4.18148
2.4498	2.16994
4.65503	4.34379
2.94575	3.06582
3.8059	2.93419
3.20606	3.17247
4.18654	3.57653
3.24507	2.03676
3.71014	3.09355
1.59818	1.36723
3.13216	3.74127
3.72204	3.45347
6.94851	6.38903
3.66381	2.78585
4.37022	3.79984
6.30117	5.95747
4.45988	4.63028
3.37048	3.09536
3.27664	2.66664
1.80229	0.024183
5.83525	5.38547
5.39726	5.30056
4.72705	3.49043
3.01491	1.90305
3.10935	2.54764
0.527433	0.672596
4.88077	4.21797
2.72429	1.73939
4.34065	3.48475
4.34582	4.11327
2.77927	1.9199
3.98881	3.61585
2.3331	1.80198
4.15366	3.92217
2.64124	2.73675
3.08955	2.72133
5.4686	5.24839
3.39975	2.84694
7.7984	7.65482
4.66691	4.40723
1.48036	1.27732
2.08986	1.51767
4.79586	4.79641
5.00969	4.84718
3.12267	3.26567
1.08566	0.694765
3.89717	3.95318
3.55244	3.35781
0.921592	0.615738
8.47861	8.46163
3.95662	3.33311
2.7883	1.83037
3.03319	2.32161
4.54629	3.90152
4.54165	4.33188
3.46526	3.14426
6.74853	6.45888
3.53481	3.09051
1.30925	0.534186
2.46162	1.46556
5.6573	5.56803
3.58022	2.65245
3.70441	3.87021
2.1889	1.10811
3.76948	3.12434
3.25267	2.55777
3.97323	2.93123
4.01348	3.68062
4.56016	4.23796
5.84479	5.3707
1.95175	0.930629
4.41955	3.28463
2.57666	1.98365
3.07503	3.20591
2.01069	1.61219
3.21684	3.17723
5.74213	5.1502
3.27123	2.32853
4.65963	3.64232
3.96416	3.57084
4.05251	3.80917
5.90336	6.09598
0.849598	0.461033
2.69447	2.45275
2.85457	2.1311
1.59051	1.25407
3.49109	3.15765
2.37721	1.41018
2.87357	1.48859
3.47456	2.93166
4.62841	4.21494
1.33654	0.250849
0.521137	0.170889
2.89069	2.82842
3.65574	3.05736
2.41752	1.5665
5.79597	5.68331
3.45117	2.68858
2.54404	1.81352
6.45371	6.60738
2.34505	1.35761
7.33512	7.41348
3.01163	2.45135
2.48498	2.44905
5.89357	5.67998
2.31482	1.75422
3.68862	3.55873
1.92574	1.28974
4.33613	4.04215
3.83907	3.24856
4.36288	4.37815
1.4279	1.08664
4.69962	4.53666
4.12312	3.57383
3.11953	2.78309
4.48531	4.51179
1.30925	0.910749
4.0903	3.74445
2.64051	1.60924
1.37643	1.15056
7.42225	7.46054
2.56128	2.87184
6.93298	6.99659
4.1913	3.43541
2.52762	2.08242
4.7786	4.28754
5.89833	5.71156
2.63498	1.97179
4.02063	4.39318
3.45095	3.22453
2.08364	0.501217
1.77024	0.925967
1.97809	1.05493
5.84083	5.84612
6.96465	7.04711
4.38586	4.70138
1.96832	1.22756
2.80872	2.45486
3.13559	2.70744
6.55718	6.58313
5.17155	4.19175
7.48924	7.53735
3.03883	2.09968
2.11558	1.90239
3.04521	2.46134
1.93269	1.58244
3.41857	2.02454
6.0754	5.53796
4.15049	4.17769
2.07246	0.709592
1.5865	0.74021
4.15449	3.32876
3.29887	2.12794
3.70381	3.89545
5.40487	5.04798
5.77696	5.49514
1.33271	1.42058
5.14214	4.36566
3.47186	3.47709
5.3009	5.09336
3.38726	2.48447
5.01104	4.64232
3.32164	3.0325
3.56359	2.78804
1.76657	0.859959
2.95384	2.73604
3.576	3.30944
6.06843	5.95505
3.23108	3.09536
5.4147	5.11731
1.24111	1.20301
2.11932	1.13164
3.63384	3.17571
1.77477	1.69655
2.41853	2.4606
2.8517	2.43434
3.19069	2.49893
3.82893	3.35394
3.01259	2.40121
6.88999	6.8426
4.67306	4.4267
1.90726	0.788867
6.1261	6.18193
3.48241	3.05736
2.85925	2.25542
3.37309	2.65574
3.09313	2.11812
6.24606	6.17219
3.74351	2.83875
1.90572	1.97476
1.90111	1.22117
5.70612	5.40777
2.95172	2.34171
3.28772	2.80784
3.5984	3.10543
4.05686	3.7043
5.63225	5.27142
4.42495	4.29606
1.03933	0.0370071
2.54685	2.55537
7.27276	7.17084
5.06193	4.69147
3.99024	3.86142
1.85674	2.13328
3.52651	3.54586
1.70918	1.63096
4.22243	3.63922
6.90829	6.86261
3.99162	2.85894
4.62098	4.22625
5.78716	5.38359
2.54247	2.17737
4.22675	3.93429
6.40479	6.55265
2.34335	1.39312
5.71973	5.79685
3.73615	3.86001
4.82142	4.25725
3.20796	2.94432
1.4279	0.967466
0.593046	0.635115
4.69538	3.90737
6.43611	6.289
2.98789	2.76692
4.99859	4.67899
3.24056	3.0843
3.49015	2.61429
2.85064	1.94842
5.13137	4.65943
4.81712	4.6658
7.17066	7.53973
3.3176	3.12794
4.88347	3.83783
5.06177	5.08366
3.78274	3.48377
5.75998	5.80757
4.38315	4.00489
3.15535	3.13602
10.5792	10.7207
2.90007	2.66796
6.09121	6.3072
8.26531	8.40226
5.22815	5.03592
6.14866	6.04017
1.42488	1.01629
2.90465	2.11445
4.22341	3.67239
2.72711	2.60568
2.33387	1.9609
6.47279	6.46432
4.39672	4.25821
4.11507	3.48198
1.28645	0.12499
4.79756	4.16915
5.50039	5.17914
3.84234	3.88441
2.88399	2.33132
2.27396	1.98345
3.09775	2.11494
3.18131	2.85545
1.7902	1.07328
5.48453	5.13774
5.26273	5.13912
5.32926	5.18722
1.62541	0.313847
4.75705	4.80917
5.17339	4.44666
4.07556	3.3673
3.3584	2.84793
2.73365	2.81319
4.67467	4.61663
1.40861	1.13173
5.04561	4.54937
5.46127	5.15397
3.62557	3.22018
3.76715	3.58011
2.16873	1.6658
5.28776	5.17355
5.42854	4.90052
3.88571	2.91965
6.5637	6.20738
4.03899	3.99902
5.01232	4.68646
6.65548	6.53785
3.47472	1.97776
5.42049	5.21911
7.57901	7.25942
6.72601	6.59925
5.68729	4.94936
3.52756	2.90466
7.11744	7.26748
2.69822	1.97476
4.68072	4.04735
5.4315	4.7598
1.12121	0.763669
7.13752	7.08385
3.73538	2.91311
3.27906	2.98905
3.05277	2.526
6.13841	6.15026
4.03652	2.59294
4.79401	4.47187
3.8777	3.64769
4.3254	4.50871
4.43409	3.32331
4.15409	3.75402
2.21733	1.37488
3.34886	3.28939
2.78016	2.30565
1.82538	0.867446
3.8696	3.27732
3.44954	2.89645
4.60188	4.52684
4.08503	3.63824
3.54183	2.95587
5.91654	5.72547
3.39519	2.90477
0.851705	0.0193051
4.60403	4.6975
0.8953	0.200404
4.05863	3.62863
6.62504	6.4165
3.8835	2.60655
5.5986	5.2526
5.12761	4.4747
4.29541	4.10877
1.84039	1.48513
3.3577	2.29095
5.18795	5.33931
6.31461	6.16113
0.357508	0.206932
3.05605	2.63578
2.85869	2.19715
3.85081	3.49491
4.24487	3.4161
4.04466	3.45309
5.73889	5.31672
4.45319	4.04
4.46386	3.93421
3.56046	2.82117
3.72068	3.58342
4.54177	3.89862
2.94983	1.87289
2.16408	1.08657
2.76139	2.44892
3.95916	3.64614
5.03151	4.69362
2.9337	1.85916
7.68141	7.60705
5.20185	5.2374
2.66045	2.03955
3.51089	3.14487
4.32056	3.65256
5.17519	5.02963
3.98496	3.46778
4.17867	3.48377
1.58111	1.37525
2.86463	2.27556
2.92056	2.89336
9.2287	9.14961
3.02092	2.52907
4.60227	4.22188
3.70632	4.0285
4.01959	2.91694
2.69642	2.58405
5.43444	5.08175
8.18631	8.13993
5.19326	4.70633
4.37009	4.24155
6.32238	5.63862
5.1037	5.38174
3.52156	3.36508
2.44607	1.22186
2.29372	1.17352
6.37661	5.94717
4.10814	3.58878
4.19505	4.35741
1.58356	0.839029
3.06165	3.42091
4.09864	3.4646
2.43165	2.23668
3.65973	3.16164
5.46423	5.11188
3.80252	3.51497
2.76401	1.52315
5.33057	5.32149
3.57959	3.46525
2.3977	2.05563
4.2076	3.335
4.89305	4.51266
5.19764	4.97122
4.50655	4.18707
4.9766	4.9855
2.99606	2.86228
2.98602	1.70616
2.86278	1.84072
4.4761	3.59925
5.10239	5.13594
2.35751	1.74535
4.4591	4.85889
2.63205	2.46088
5.58906	5.33322
3.44429	2.82828
3.25623	2.53931
6.05159	5.82851
4.04218	3.45155
1.88548	1.9997
5.42243	5.40792
1.58223	0.779757
1.86469	1.25591
6.38296	5.92517
7.53625	6.86179
5.34682	5.08933
7.1055	6.95851
3.23525	3.07801
1.24559	0.480308
2.87945	2.20608
5.81244	5.85883
1.32123	0.961941
1.967	1.57297
2.12941	1.27532
3.85033	3.64597
0.576633	0.133275
5.95679	6.08905
5.78293	5.9774
3.58815	2.79547
4.61632	3.87188
4.87303	4.13873
3.20049	2.9294
6.44967	6.19948
2.81017	2.57213
2.38911	1.14229
3.59831	3.05968
1.97426	1.49124
3.73757	2.90995
2.1981	1.88653
2.86069	2.23265
5.31808	4.67089
5.37444	5.2133
0.694233	0.736302
3.73716	3.13982
5.41828	5.44104
4.99571	4.67884
2.1486	1.79835
4.14677	3.91839
4.06717	3.9179
6.05468	5.77117
4.25921	3.76226
4.41422	4.19326
1.72176	1.34879
6.61936	6.80769
4.95146	4.39597
6.12071	6.15845
6.04733	5.31237
4.05055	3.96388
2.65921	2.03528
2.75413	2.74521
3.91878	3.5787
4.20236	3.09478
4.04261	3.89976
4.01741	3.66338
2.07875	0.623317
7.42356	7.35496
6.12618	6.14071
2.58554	1.8054
4.03155	3.60292
1.74601	0.788083
3.59129	3.43105
2.95232	2.29695
3.80032	3.75992
6.7087	6.69523
2.65211	1.74761
6.37594	6.20411
5.87296	6.01965
5.39981	5.06385
3.87658	3.10792
7.66473	7.60808
7.30894	7.08503
3.87768	3.03839
6.27874	6.16852
5.23829	5.01429
4.70798	4.63578
2.04117	1.76131
6.59852	6.5195
4.45906	3.73135
4.86635	4.67007
3.10185	3.31385
3.55522	2.77417
5.02252	4.86487
1.94062	0.889118
2.77216	2.34116
2.59433	1.75376
1.29731	0.89881
5.41085	4.96371
5.64732	5.18421
3.76991	3.6078
3.83707	2.4817
3.21549	3.10002
3.01642	2.1547
3.1366	2.1105
6.40752	5.28258
7.51369	7.60889
2.90091	2.45293
3.67739	3.05161
4.65787	4.37396
3.73219	3.51313
3.58509	3.52913
3.45384	3.08563
5.65785	5.33622
3.4065	2.98417
4.42923	3.92649
2.80754	2.34711
1.97802	1.13691
4.75435	4.76447
4.60637	4.25208
2.24007	1.62318
5.95973	5.61574
5.55024	5.01429
1.53629	1.47883
5.16998	5.06797
5.3941	5.32045
7.58914	7.40158
0.909056	0.103128
5.0386	4.8391
3.59625	3.16714
3.12874	2.74951
6.2647	6.21074
5.11878	4.8204
1.4417	0.483772
4.69391	3.51307
2.98157	2.4218
4.29792	3.81171
2.54521	2.21644
1.41541	1.51888
3.99635	3.64284
3.0733	2.78801
3.22301	2.29781
8.89632	8.99736
1.10457	0.758569
6.82578	6.68779
2.84051	1.31868
3.93002	3.84836
3.74828	3.32003
1.66102	1.70309
4.62228	4.37562
4.46096	3.71544
2.87093	1.83208
1.51049	0.304629
5.75926	5.99958
2.91659	2.33927
3.5921	3.11959
5.42701	4.39931
7.17189	7.16241
3.66194	2.62197
11.1849	11.2373
6.28034	6.36792
1.49985	0.239354
3.30925	3.64998
2.38613	1.81761
3.62131	3.49032
4.36245	4.15972
5.45284	5.01668
6.88202	6.94717
4.26576	3.26731
5.7083	5.62121
0.824574	0.709102
4.53554	3.85772
2.82832	2.36996
4.59663	4.67417
5.67707	5.55116
3.77457	2.94789
2.94516	2.64541
3.71064	2.76316
4.77291	4.43947
3.8799	3.13982
2.54814	1.15996
2.88504	2.67279
1.85159	0.374283
4.69198	4.47507
8.75387	8.77624
2.27776	1.84136
2.20845	1.89438
1.74166	0.642177
1.10463	0.47532
6.21351	5.93226
7.93939	7.99614
1.2222	0.974759
1.18884	0.739925
4.63732	4.55011
3.4505	2.79966
4.37149	4.56397
3.50655	3.08704
5.80314	5.11831
5.34385	5.11481
3.73518	3.13982
5.39977	5.18421
5.81699	5.45134
5.19982	5.31784
3.40644	2.58019
0.763866	0.17122
4.5341	4.68086
6.65948	6.48166
2.97931	2.32623
3.8747	3.51179
2.70338	2.15497
5.61757	5.30961
4.1075	4.01673
3.39244	3.28766
1.22465	0.358348
5.87788	5.87755
2.05022	1.01429
3.99375	3.8027
1.16222	1.31121
4.08353	3.75279
3.44096	3.03204
2.91397	2.36295
1.54901	0.301569
2.93325	2.49129
1.21974	0.959246
4.13481	3.97321
4.55718	4.41171
2.6407	2.60877
4.71978	4.63937
2.98405	2.49325
0.966132	0.48464
1.89738	1.81392
4.47691	3.16576
5.36068	4.73252
2.32836	2.12532
7.03053	6.91384
1.14116	0.981598
4.21141	3.63341
6.53234	5.84692
1.91332	0.665887
4.40552	3.93399
6.92344	6.78163
6.77342	7.00582
1.79436	1.23603
2.94879	2.65924
2.54436	1.00146
4.53672	4.63537
4.19284	3.51642
0.145367	0.187436
5.91228	5.51029
3.51685	2.74036
3.46156	2.75194
5.59465	5.58014
4.89224	4.22479
3.29472	2.96727
2.06332	2.17148
2.56934	1.75478
3.0202	2.47055
4.34743	4.34476
3.79681	3.51526
2.25137	2.58295
4.66821	4.44725
3.62237	3.20734
1.30681	0.301569
3.78415	3.25035
2.98083	2.65295
2.75175	2.13982
4.10617	3.8923
6.26932	6.35225
4.599	4.14114
2.56257	1.82396
1.46526	0.844362
5.01478	4.52519
7.18715	7.22099
4.38797	3.18611
2.08009	0.573953
1.6874	1.62256
4.41102	3.92533
7.1879	7.06663
2.97222	2.97287
3.21404	3.22914
2.44497	2.79189
3.70523	3.57935
1.85023	2.26427
2.52216	2.13681
4.30792	4.14646
7.95437	7.70606
3.15508	3.01429
3.18795	2.88791
2.99682	2.66733
5.49768	5.6281
1.97453	1.96002
0.230555	0.14138
3.73406	3.10122
2.86504	2.16146
7.42976	7.3902
6.97923	7.11819
1.07965	0.0392539
7.01602	6.93026
2.97537	2.33811
5.42712	5.30198
5.53161	5.11499
6.0497	6.18089
4.86032	3.85989
4.18618	3.72321
4.6992	4.41683
5.68963	5.59694
5.25254	5.33475
1.36736	0.30251
3.72035	2.53236
4.91332	4.08925
0.591066	0.088815
3.23071	2.32199
4.35816	3.96907
2.37543	2.12204
2.81873	2.09675
3.80979	3.00087
0.886777	0.443419
3.95669	4.01737
4.94495	4.23213
4.48208	3.98258
2.99612	2.84264
7.21837	6.81535
3.20384	2.33297
3.78534	3.49199
1.96075	1.40243
2.965	2.19972
2.69016	1.62148
0.900462	0.400004
1.89521	1.21292
3.80283	3.53747
1.22603	0.567663
4.32937	4.05425
3.705	3.49073
5.22913	5.05646
2.06757	1.54135
3.02825	2.33336
3.06242	3.12618
2.37854	2.03157
2.11872	1.43144
1.94247	1.00714
6.78046	6.64374
4.52283	4.55618
3.97864	3.71473
4.22118	4.08267
3.30479	2.96676
4.81571	4.54428
3.46972	2.61513
1.91416	1.20526
3.86047	3.57819
4.60917	4.47492
2.30925	2.41545
4.54755	4.24987
4.7205	4.47012
4.30844	4.07813
2.25488	1.61106
2.45968	1.90451
4.45404	3.93938
3.10368	2.48434
3.21073	2.48107
2.7755	1.72564
6.15863	6.20479
5.22517	4.59733
5.46656	5.02081
3.61914	3.12643
3.79777	3.78375
3.76329	3.19789
6.04318	5.58299
3.39292	2.9798
2.96734	2.16872
2.82254	1.94751
4.87911	4.09401
3.58633	3.28832
3.58004	2.16196
2.14053	1.26277
4.9389	4.62473
5.14338	5.09846
3.4413	3.36169
4.51128	3.81949
2.66546	1.55866
3.28481	3.08246
2.85382	2.55486
2.43337	1.90776
5.10087	4.18421
1.76517	1.44467
3.20321	2.86831
2.27647	1.59506
3.31641	2.44231
3.21323	3.46175
3.49109	3.09794
2.95285	2.82986
2.95136	2.39439
9.59593	9.76917
4.50662	3.56746
4.33936	3.54525
4.78825	4.57879
4.49183	4.14904
5.60241	5.90454
5.67383	5.21922
6.88844	6.74735
4.54473	4.28145
2.02769	0.454098
1.65166	1.51865
5.24381	5.29439
6.91312	6.47595
4.00433	3.73633
3.92649	3.14543
8.56879	8.70359
1.32312	1.6062
6.63435	6.07825
2.20388	1.35432
5.34533	5.26341
2.71588	1.85579
2.01347	1.58278
4.59982	4.43113
5.53815	5.37686
2.12319	2.41902
5.49964	5.00616
5.85674	5.74681
2.58243	1.28195
3.95573	4.04671
2.64436	2.25347
2.49241	1.77775
4.35597	3.99279
4.6324	4.41759
2.74027	1.92086
4.87842	4.53262
2.67803	1.85135
3.12563	2.44333
3.5782	3.24056
3.97222	3.03035
2.86461	1.96382
1.71483	1.21633
5.72101	5.68349
4.97624	4.639
3.3087	3.26396
6.22326	5.5483
3.37498	3.03853
3.95224	3.56917
4.50133	4.03843
4.09185	3.67936
4.42931	4.13619
4.94686	4.5807
5.24015	5.05779
2.57112	2.11786
3.62933	3.69755
1.91679	1.04292
5.51411	5.56213
4.26014	3.71962
3.60298	3.19221
6.06118	5.91462
3.24248	2.57733
5.2336	4.97421
3.63735	2.97776
5.64654	5.62211
4.21737	3.79189
5.41532	4.99004
4.24986	3.69655
3.1569	2.02063
4.52743	4.24193
8.06794	8.22222
3.57736	3.4037
4.58438	4.22243
5.14672	5.09446
7.79182	7.60462
2.95669	2.22382
4.4417	4.18421
4.33933	3.95573
5.5726	4.56521
3.9517	3.85796
2.21449	2.37686
3.85056	3.75439
3.98075	4.53804
6.30622	6.23581
7.03078	7.14522
6.22326	6.20276
6.10641	6.15749
3.07011	2.46448
5.78956	5.74735
1.67275	0.749584
4.92878	4.44453
4.72826	4.60443
6.25379	6.3433
4.42288	4.20543
0.512786	0.32039
2.92915	2.79719
5.26619	5.04066
3.28572	3.05571
5.92907	5.72954
5.30089	4.76583
2.95024	2.23623
2.90235	2.32039
6.25944	6.1073
3.08033	2.34396
2.10334	1.17578
7.15178	6.67768
4.46578	4.03696
7.13237	7.04611
5.09847	4.63163
0.434784	0.213818
3.81894	3.39838
1.60138	0.872931
5.25127	5.12949
3.02113	2.37354
4.37432	3.85079
3.99494	3.62197
3.71541	3.46571
3.68015	3.48569
1.98771	1.65127
4.49559	4.03778
6.38726	6.18489
5.52877	5.45126
2.51996	2.54885
4.20243	3.88376
3.90824	3.61104
6.23433	5.91712
5.71135	6.04381
1.70492	1.06418
2.07272	0.977284
5.04751	4.69236
3.31542	2.90293
1.15488	1.10384
5.31039	5.24637
0.253399	0.780896
0.632368	0.481792
5.05148	5.18581
2.37396	2.0941
3.36641	2.66535
3.07019	2.8923
3.19461	3.36792
4.65465	4.65255
1.41527	1.18316
0.970991	0.442745
2.43929	2.1542
0.967417	0.453093
4.98419	4.61519
2.52027	1.84864
6.13707	5.8186
6.60501	6.49856
4.67639	4.34591
4.84148	4.51089
5.72265	5.74221
5.36497	4.98502
2.1992	0.910628
4.42741	4.7183
7.22567	7.1912
3.89938	2.61251
0.615283	1.16431
4.38133	4.06083
0.909482	0.799548
4.3633	3.8449
3.25233	3.26004
6.46461	6.05214
7.76257	7.79076
2.85555	2.11335
1.80074	0.856746
4.09193	3.83197
8.13052	8.04246
4.21809	3.95204
5.9639	5.7808
4.15938	4.26495
4.93994	4.64532
4.96849	4.85732
3.08795	2.33165
6.06189	5.88387
4.06619	3.85301
6.86591	6.82675
1.09477	1.16926
2.84446	2.52396
8.10524	8.07056
6.96273	6.68945
1.77428	1.53624
6.96422	6.58236
1.37727	0.156306
4.08325	3.66589
4.33737	4.2219
2.76462	1.99934
3.76323	2.97176
2.99077	2.32712
6.17902	6.0625
1.34596	0.928593
4.19505	3.83249
5.11412	4.67654
2.15863	1.74127
1.95854	1.57177
2.35002	0.889591
5.92729	5.8937
8.47229	8.67127
6.76014	6.5369
5.66599	5.6256
5.9603	5.93478
4.65999	4.59103
4.88422	4.72193
3.84479	3.49759
5.05858	4.84026
5.76336	5.29036
1.13397	1.55791
4.41535	4.2528
4.24703	3.72162
2.34238	1.57001
5.53584	4.25988
6.75024	6.44967
2.9575	3.12694
2.25991	2.27732
4.1101	3.33539
4.16695	3.85112
1.77746	0.989455
6.6041	5.991
4.86586	4.29461
3.79422	2.96182
3.24112	1.97402
2.83471	1.86298
3.93677	4.08267
5.30531	5.10257
2.5604	2.36497
4.27552	3.72433
3.5685	2.69803
0.363872	0.125834
5.13119	4.83066
2.48458	1.60807
4.90157	4.21834
5.94936	5.26236
2.26401	1.71636
5.87811	5.896
5.2703	4.95391
2.93864	2.01173
1.43359	1.3456
3.18945	2.71028
5.46369	5.25235
3.07786	2.59414
5.68038	5.12718
7.38118	7.21441
4.79672	4.82798
5.69364	5.75125
1.16327	0.188461
5.45908	5.49807
5.33292	5.33509
6.09919	5.95539
3.16008	2.79825
3.59251	3.71013
4.00772	3.46482
5.32398	5.13604
1.94515	1.28267
3.19845	3.16252
3.57948	3.29519
2.44301	1.66065
4.45646	3.28008
6.40308	6.54153
5.09499	4.22184
3.4386	3.65172
3.65672	3.32795
4.36955	4.04905
2.1101	0.924756
2.78498	2.10061
3.86281	4.01591
4.54793	4.11659
5.12148	4.85543
7.65401	7.48597
7.04892	6.53763
7.96614	8.23386
3.93297	3.33183
4.04368	2.89179
1.57692	1.18289
3.66547	3.58309
5.63093	5.22728
3.51279	2.55486
1.27178	1.1212
6.22344	6.16478
6.81711	6.72411
4.7463	4.53683
2.76376	2.08267
4.1469	3.74839
2.70054	1.85509
3.8901	3.48064
6.30901	6.05681
3.82488	3.41525
5.40973	5.4028
5.93203	5.91376
5.13962	4.08791
2.55923	1.69646
4.9139	4.37583
3.09823	2.46327
5.85307	5.98167
2.8088	2.41318
5.82803	5.31727
2.06533	1.61836
4.77318	4.82377
5.34806	4.81135
2.04852	1.7355
6.64488	6.56056
5.60466	5.69521
4.31568	3.74107
1.43134	0.888443
2.02634	1.81207
0.389483	0.119609
5.03466	4.86228
0.653856	0.150491
4.59894	4.37015
3.76176	3.23268
6.89499	7.05432
4.64594	4.12075
6.33944	5.81641
2.33359	1.73947
5.83654	6.1151
5.03635	4.64232
3.04261	2.78512
7.45072	7.3003
5.2518	4.86767
4.7054	4.19765
2.71876	1.90456
5.06773	3.31893
3.61213	2.76853
3.8368	3.23071
1.68591	1.32463
4.44359	3.35195
5.79468	5.76749
4.39099	4.12573
4.8961	4.37098
2.19357	1.0781
1.3543	1.2139
5.64677	5.07719
5.72499	5.74424
3.86644	2.93814
2.98493	2.17139
3.94713	3.48543
4.14162	3.49726
4.01572	3.70336
5.82538	5.83488
0.629196	0.374283
2.44693	2.47193
1.32014	1.55486
3.6039	2.76284
8.85374	9.06018
5.78372	5.15481
0.351631	0.241698
2.29567	1.28827
5.7751	5.95853
6.7179	6.44833
6.37432	6.25133
1.88823	1.58927
6.8576	6.41953
3.61467	3.38466
8.58327	8.68981
5.11661	5.26948
8.75385	8.8173
6.43941	6.54315
3.23957	2.91598
4.46733	3.68895
7.39944	7.64156
3.31511	3.20517
1.37585	0.757406
1.02113	1.2007
4.00283	4.022
3.3072	4.4436
3.72917	2.8857
5.94165	5.65404
3.26934	2.64355
6.23413	6.05193
6.25943	6.34418
2.47712	1.92636
4.43372	3.94912
3.03316	2.81009
4.28742	4.09582
6.40412	6.01785
4.61772	4.38883
2.52993	1.35232
6.68332	6.98982
3.61051	3.12465
4.85451	4.38477
3.93068	3.39579
1.50295	1.91275
5.12322	4.75598
3.61347	3.32623
1.42611	0.944613
4.30994	4.00053
2.91029	2.40487
8.17609	7.99483
7.11406	7.07465
5.93877	5.38352
5.52829	5.37633
1.10597	1.46997
4.45669	4.33956
4.81211	4.93805
3.76995	3.64872
2.48679	2.37686
7.73071	7.76349
2.50595	1.95434
5.01981	4.8229
4.6756	4.32682
2.56334	1.60541
3.38726	3.32979
3.53093	2.91275
0.840189	0.367685
5.14072	5.13075
3.48174	3.21948
5.08411	4.81201
4.63604	4.69033
5.31136	5.38166
7.50044	7.49381
8.02849	8.12281
5.03278	4.35383
7.13298	7.37762
4.81601	4.48797
1.4106	0.818795
4.65463	4.82115
2.94936	2.17429
6.46621	6.31197
2.11776	1.92279
3.7531	3.54581
7.79081	7.39329
4.50624	2.87206
4.39491	4.5931
4.98929	4.55271
7.43257	7.59925
6.64103	6.47511
7.293	7.31173
5.25652	5.09079
5.90648	5.65881
5.59128	5.42284
5.5225	5.3451
2.90572	2.26427
4.71872	4.68551
5.15503	4.88059
5.93692	5.6597
4.80449	4.55559
4.87392	4.82288
4.67582	4.13293
5.57341	5.38871
5.21265	5.20155
5.09997	4.68006
2.04212	1.19666
0.699199	0.741269
6.27054	6.12473
3.54513	2.45549
3.33966	3.40869
1.93569	2.52525
3.59671	3.57907
6.24217	6.15683
5.67866	5.49639
7.21434	7.15175
2.69494	2.38909
4.59924	4.48377
6.98032	6.87381
1.28608	0.435061
0.130915	0.172985
7.97535	7.91616
5.7477	5.71342
4.56038	3.84836
4.01492	4.05699
3.98078	3.70943
4.44836	4.3794
3.58816	2.79069
5.32165	4.70961
2.23225	1.73375
6.82175	5.99073
5.89562	5.92302
5.65787	5.71606
4.72053	4.3463
8.19301	8.17055
2.77789	1.74794
4.69486	4.55027
5.30342	5.03737
5.34065	4.91765
5.42437	5.4561
3.72126	3.51179
4.43042	4.48227
2.96044	3.1803
8.18167	8.45723
2.56314	1.16939
5.08154	4.86909
7.59538	7.57696
5.57333	5.08699
5.70656	5.78367
5.22401	5.19433
6.05968	6.08164
5.41315	5.51457
4.54613	4.39872
6.24701	6.18993
5.57586	5.38845
4.53147	3.59804
4.34379	2.94488
3.16	2.46131
0.839767	0.766359
4.46492	3.6035
5.69819	5.18421
4.32821	3.94365
5.69498	5.61559
6.85858	7.04399
6.88225	6.67711
0.244297	1.28637
3.54894	3.56882
1.80544	1.46049
1.55284	1.02723
1.07336	0.437362
3.25006	1.88043
5.63993	5.20395
2.84046	2.21858
3.61679	3.51447
3.73406	3.02988
2.53781	2.17779
4.33705	4.22888
5.04261	4.87723
3.15942	2.83892
4.81827	4.68431
3.58755	3.59925
5.98068	5.69765
4.23836	4.44171
4.25137	4.16791
4.41034	4.45241
1.75683	1.18304
3.42234	2.34242
0.620007	0.109535
7.12641	6.97809
4.2493	3.45351
4.60631	4.65481
3.82392	4.11456
4.73522	4.1901
0.306092	0.222631
4.8916	4.85413
4.31046	4.01549
2.99424	2.19579
2.37427	1.96735
2.29104	1.28248
2.00094	1.36183
7.17415	7.07872
4.231	3.47526
6.70573	6.44842
6.10255	5.70569
3.96846	2.82014
4.48679	4.20693
6.12602	5.79596
4.30974	4.03569
5.83536	5.81349
3.06471	2.02839
3.99283	3.12416
6.22703	6.01974
2.27093	1.81874
2.35267	1.53675
4.74375	3.83959
2.18616	2.01964
7.6514	7.76612
6.38726	5.73549
5.82093	5.44378
5.38008	5.77553
1.45211	0.531337
7.17799	7.06444
4.69211	4.53169
2.9932	2.11267
5.90056	5.96746
1.91332	2.57988
4.45642	3.95289
4.69616	3.51346
3.42508	3.07174
4.77731	4.55089
2.43788	2.8699
4.81108	4.64846
5.55718	5.39866
4.03135	3.82767
3.63118	2.75571
5.11229	4.75464
4.78487	4.56852
5.13475	4.1021
4.27416	4.36493
2.45165	1.11262
2.36454	1.72478
5.73453	5.71051
5.63642	5.59199
5.84762	5.77619
5.27401	5.23566
5.14618	4.82337
6.33479	5.91528
2.72455	1.69027
5.91438	5.72839
3.54199	2.67069
4.53388	4.67325
7.61822	7.60079
4.83378	4.98802
7.05909	7.29736
4.65029	3.89747
2.31745	1.50708
4.5836	3.66016
3.87334	2.86838
5.19153	5.28805
5.41666	5.192
5.73045	5.74252
6.05949	6.0875
5.8929	5.87899
6.16144	5.88278
6.1072	6.14268
4.92134	4.6322
6.50329	6.29768
5.62969	5.35689
4.76836	4.2468
8.86567	8.9619
4.71954	4.72545
5.59211	5.44252
5.58008	5.1092
4.73965	3.58631
5.89922	5.41022
5.78851	5.45651
5.14526	5.26402
4.08476	4.04125
7.04984	7.01791
4.96973	4.65775
1.50655	1.13359
1.61573	0.783333
5.14453	5.11812
4.45764	4.26683
5.45631	5.32795
2.16265	1.57245
3.26808	2.68866
5.15612	5.00616
5.9569	6.03446
1.87804	0.987219
6.38878	6.14287
0.854608	0.366162
4.24756	4.041
4.42545	4.31012
5.50801	4.80024
4.63348	4.03715
4.03458	2.82247
8.43496	8.48263
4.57405	4.27732
7.35648	7.38449
6.43067	6.14787
3.6378	2.85675
5.30895	5.4042
4.13928	3.80893
4.10139	3.23838
6.13442	6.00269
4.73201	4.27289
3.32111	3.08078
5.31207	5.22652
7.37578	7.48624
3.54045	3.44116
8.10322	8.11583
1.61943	0.539507
5.60335	5.59455
3.11103	2.94922
5.17823	5.21459
2.40393	1.83595
2.81468	3.24377
5.15863	5.21257
6.23612	6.27385
3.26229	2.36981
4.23716	3.0632
4.448	4.38664
3.90343	3.73835
5.58633	5.47104
1.42942	0.176038
2.42225	1.46432
3.87781	2.89665
5.56531	5.53252
2.98746	2.96304
3.95736	3.38045
3.20926	2.20693
3.71729	2.99382
0.678859	0.881393
3.08195	2.27967
1.69822	1.11226
3.90018	3.41925
3.71748	3.41889
3.73726	3.25208
5.08043	4.93608
4.80309	4.68596
2.41241	2.48619
0.0702679	0.112337
2.47222	1.33371
7.75559	7.40555
4.80903	4.18552
3.93052	2.91815
4.14561	3.78493
2.25706	1.88409
2.62533	2.13473
5.54816	5.0866
2.7226	2.98707
3.15508	2.12676
5.2203	5.2243
4.69685	4.42932
2.74359	2.16753
2.57736	1.50013
5.08015	4.21572
3.80484	2.95444
0.874065	0.145616
4.60915	4.36762
4.08734	3.89419
6.43854	6.2093
7.40327	6.96715
8.31457	8.33376
3.21774	3.04656
3.66018	2.5001
7.61816	7.35334
2.94365	2.51179
3.61722	3.26501
3.77696	3.00971
5.29322	5.07337
4.08896	3.43344
3.86187	3.81231
7.25385	7.45929
4.85674	4.6103
6.38228	6.57346
3.89092	3.69483
7.72441	7.60873
5.93539	5.60318
4.56504	4.44987
7.06814	6.77982
4.95839	4.32071
2.00157	0.994728
3.33479	3.27732
3.60714	3.18129
6.32271	6.11509
5.99783	5.93103
5.30063	4.72542
3.6378	3.70063
2.87761	2.71322
3.76363	3.44313
1.83784	1.87991
5.72552	5.68475
7.35106	7.24822
2.94913	2.56057
3.08531	2.82253
7.24489	7.3342
2.82402	2.16248
5.35073	5.35057
4.74229	4.61632
3.24963	2.41723
2.30644	2.08548
1.4825	0.903084
1.93058	1.34816
5.99964	5.85521
4.24524	3.89809
2.51469	1.91584
3.69583	3.10986
2.90113	1.22074
3.09566	2.32344
3.60787	3.41142
4.53138	4.53578
5.11146	4.98768
4.03984	3.86873
1.4381	0.461315
1.04411	0.823146
2.90001	2.59242
2.3706	1.49633
2.62054	2.39053
2.53257	2.07325
1.41877	0.875873
3.12637	1.7986
3.45815	3.19715
3.65493	3.19148
4.69181	3.12144
3.61163	3.42237
1.70856	1.50551
5.55718	5.50893
1.15119	0.456292
1.60671	0.326853
3.90605	3.36936
4.62644	3.99044
5.66653	5.86795
6.51053	6.52179
4.89293	4.54954
1.43579	0.860109
5.41866	4.83321
3.1507	2.26763
5.34464	5.36694
0.371314	1.41338
3.82629	3.76796
4.62502	3.60914
4.25762	4.04317
7.02185	7.11435
2.67714	3.20902
2.54311	2.81964
3.56364	3.20207
2.09229	2.67868
7.38635	7.15833
2.61347	1.79572
8.07814	8.12318
2.85305	2.23615
6.65404	6.49541
5.08934	4.88348
1.51279	1.27106
4.13598	3.83371
3.94156	3.84815
5.26869	5.37838
4.48539	3.81964
3.97502	3.53334
3.28007	3.02127
3.94011	3.40632
3.63503	3.40618
3.21667	2.59132
4.44429	4.89298
5.61781	5.35946
3.90809	3.53512
2.88317	2.53697
2.56593	2.17737
6.56923	6.55001
1.13465	0.00679247
3.6338	3.18712
2.93352	2.47989
3.24919	3.61319
5.69284	5.80705
4.40558	3.76557
4.14294	4.06758
3.65029	3.10175
8.11852	8.14927
3.81928	3.48938
2.81937	2.33469
5.00221	4.8643
3.41892	2.87603
4.20123	4.19326
3.88507	3.52786
5.6114	5.61148
4.44786	4.34133
5.98081	5.76644
3.41378	3.31952
8.10028	8.00892
3.45482	1.91193
4.5928	4.53471
6.9254	6.84056
0.847522	0.889591
3.78326	2.95539
4.76008	4.64372
5.27281	5.02057
6.31617	5.78594
3.05822	2.42222
3.35688	2.75125
5.30654	4.63929
5.62577	5.42425
8.2192	8.28653
5.49219	5.12414
2.51049	2.34902
2.64815	2.15257
6.3801	6.32614
6.57362	6.51891
5.30945	5.02387
1.49027	0.929002
4.08662	3.46807
3.40895	3.26757
2.19633	1.34693
8.7675	8.80133
4.37628	3.92409
6.12376	5.98663
5.55367	5.35154
5.35879	5.275
1.91686	1.80365
0.368877	0.517861
[truncated: 8,979 more rows]
