# Supplementary material for: Dynamic m6A methylation facilitates mRNA triaging to stress granules
Source: Life Sci Alliance. 2018 Jul 3;1(4):e201800113. doi: 10.26508/lsa.201800113 (PMC6238392; doi:10.26508/lsa.201800113)
Supplement: Supplementary file 7 [file LSA-2018-00113_SdataF6.xlsx]

## Sheet: Figure S3F
Total RNA correlation and detected clients in SG and RPFs at 200 µM AS
mRNA control log2 (RPKM)	mRNA 200 µM AS log2 (RPKM)	RPF control log2 (RPKM)	RPF 200 µM AS log2 (RPKM)	SG control log2 (RPKM)	SG 200 µM AS [log2 (RPKM)
5.17513	5.34209	9.56317	9.482	6.28903	6.02798
5.56533	5.28669	10.5792	10.7207	5.06066	4.7808
2.34383	2.01817	11.1849	11.2373	4.35073	4.34261
4.0351	4.12963	7.96614	8.23386	5.61632	5.84813
6.12661	6.09611	8.75385	8.8173	0.397309	0.269453
4.04293	3.16674	7.97535	7.91616	7.91071	7.98741
2.32784	1.74542	8.43496	8.48263	4.92836	5.07973
2.66533	2.91598	8.07814	8.12318	4.71472	4.4313
4.2494	3.87643	8.2192	8.28653	1.64344	1.20008
6.28903	6.02798	8.7675	8.80133	1.53994	1.63646
1.90374	2.06128	8.00714	7.90025	7.03937	7.02717
1.22603	0.840682	8.69468	8.7249	4.38934	4.0226
2.95221	2.48774	8.98836	8.88711	5.81094	5.92118
3.42364	3.28015	7.78168	7.6011	5.73247	5.52929
2.42594	1.50195	8.55355	8.7449	7.72711	7.89142
2.93728	2.67325	8.93486	9.08506	2.45704	1.87762
5.94622	6.02071	8.8361	8.8155	3.87358	3.54036
4.58198	4.30758	7.63298	7.74621	5.9326	5.96776
3.88102	3.64625	7.39747	7.51871	4.48575	4.05551
4.78702	4.68506	7.14846	7.39298	4.32848	4.18169
5.06066	4.7808	7.89698	7.1087	5.71364	5.81461
4.35073	4.34261	2.53728	2.86886	1.93602	1.96039
6.48236	6.15793	10.3059	10.2993	7.01625	6.96628
2.36516	1.66357	7.82168	7.73675	0.612645	0.381696
1.46407	0.686712	8.70048	8.77525	2.06075	1.41095
3.24559	2.93974	9.92045	9.99396	0.439723	0.2594
2.46274	1.76287	6.6526	6.76231	6.70596	6.73831
1.57367	0.378698	8.20187	8.29486	2.99677	3.12738
2.62757	2.11862	8.86592	8.82639	3.2284	3.2357
1.21614	0.521247	9.35999	9.44739	5.7138	5.61136
3.19881	3.17217	8.66266	8.73029	7.21731	7.06649
4.75071	4.6325	7.72286	7.52759	4.19905	4.27265
1.83471	1.40285	7.89607	7.90087	4.54334	3.96526
4.29497	3.73713	8.68156	8.57697	8.39696	8.38775
7.65965	7.61519	8.17692	6.98823	4.34582	4.11327
3.57794	2.89672	8.50051	8.51172	2.64124	2.73675
7.28072	7.31083	10.5473	10.6979	4.79586	4.79641
2.23899	1.66589	8.68249	8.8042	8.47861	8.46163
5.61632	5.84813	8.63247	8.71514	3.46526	3.14426
8.20718	8.17633	9.43854	9.51047	5.6573	5.56803
7.00217	6.6526	9.63057	9.65365	5.90336	6.09598
3.95542	3.22099	7.05683	7.4045	0.521137	0.170889
3.98017	3.58053	2.7278	3.64232	7.42225	7.46054
3.74649	2.76497	10.2844	10.3399	4.38586	4.70138
2.81422	1.89581	7.91033	8.03179	7.48924	7.53735
0.397309	0.269453	7.09537	6.88341	6.06843	5.95505
8.3052	8.42106	4.92683	5.13662	3.3176	3.12794
5.29073	5.20119	10.9645	11.0615	2.90007	2.66796
4.3817	4.38424	9.26547	9.21825	6.09121	6.3072
3.58813	3.15021	7.90742	7.84923	5.22815	5.03592
3.70054	3.26108	8.81836	8.89982	2.72711	2.60568
5.21104	5.0785	4.67683	4.74805	2.33387	1.9609
5.74053	5.0415	1.79165	0.0967492	2.88399	2.33132
2.90223	1.8663	3.66736	4.45486	5.32926	5.18722
7.91071	7.98741	5.00626	5.23204	4.75705	4.80917
5.43633	5.45011	7.50705	7.27621	7.11744	7.26748
4.81406	4.0507	9.27175	9.41019	9.2287	9.14961
3.42648	3.61056	5.06377	4.75919	3.52156	3.36508
4.5387	3.69593	8.51807	8.78449	3.06165	3.42091
5.27196	4.66493	9.51757	9.72026	2.43165	2.23668
3.6557	2.79189	7.85416	8.07915	5.46423	5.11188
3.59035	3.29768	7.5485	7.72358	4.9766	4.9855
5.52444	5.58997	7.24906	6.9806	6.05159	5.82851
4.34967	3.92531	5.34823	5.23204	5.78293	5.9774
3.50932	3.00037	3.71531	3.41389	6.05468	5.77117
2.79519	2.22192	8.65949	8.79472	7.42356	7.35496
3.16717	2.97876	7.89609	7.88465	5.87296	6.01965
4.92836	5.07973	9.53107	9.60473	7.51369	7.60889
2.1179	1.08468	7.07979	7.38338	5.65785	5.33622
1.59246	0.739715	8.92989	8.97165	5.95973	5.61574
4.71472	4.4313	7.34657	7.1302	1.53629	1.47883
1.96573	1.79835	4.20025	3.40942	5.16998	5.06797
4.14676	3.20293	5.93022	6.14425	6.2647	6.21074
2.32635	1.85692	7.45571	7.53094	1.4417	0.483772
2.94293	1.66024	7.21118	7.43065	8.89632	8.99736
3.89253	3.59925	9.88506	9.90201	5.75926	5.99958
3.62976	3.55972	2.32452	1.78163	11.1849	11.2373
1.66911	1.472	4.10173	3.7859	2.88504	2.67279
2.71872	1.98667	6.72167	6.14124	7.93939	7.99614
4.95633	4.56011	5.67705	5.74233	3.8747	3.51179
3.7775	3.13151	8.12857	8.38232	4.13481	3.97321
6.0257	6.00005	8.52095	8.34959	2.6407	2.60877
5.67431	5.4639	4.55718	3.49119	2.32836	2.12532
1.64344	1.20008	0.901828	2.42932	6.92344	6.78163
1.53994	1.63646	8.42454	8.35558	6.77342	7.00582
4.95617	4.7903	0.5799	0.62197	2.94879	2.65924
2.28489	1.91193	0.469717	1.68171	4.53672	4.63537
3.786	3.52999	6.06619	6.19893	2.06332	2.17148
4.58274	4.02788	5.66883	4.93767	7.1879	7.06663
1.35331	1.39538	7.84684	7.84753	0.230555	0.14138
5.16103	5.01956	7.47302	7.52018	2.86504	2.16146
3.26727	3.1317	11.3001	11.3722	5.25254	5.33475
4.26056	4.75635	6.02825	6.20782	2.99612	2.84264
1.06286	0.726421	5.48163	5.26994	9.59593	9.76917
1.38467	0.116401	2.79165	1.51179	5.24381	5.29439
2.72866	2.61319	6.4579	6.64472	8.56879	8.70359
4.30819	4.0615	2.03362	2.07569	5.53815	5.37686
2.00106	1.39362	9.74098	9.95036	1.71483	1.21633
2.00992	1.41456	2.96448	2.95925	8.06794	8.22222
4.59097	4.33758	5.56533	5.28669	7.03078	7.14522
2.69552	1.84068	6.12661	6.09611	6.22326	6.20276
3.48131	3.07329	2.32784	1.74542	6.25379	6.3433
4.41198	4.40221	4.2494	3.87643	7.13237	7.04611
2.24804	1.24704	6.28903	6.02798	4.37432	3.85079
5.38405	5.42251	4.29497	3.73713	5.71135	6.04381
3.22545	3.21748	7.65965	7.61519	0.253399	0.780896
2.65987	2.55116	7.28072	7.31083	5.72265	5.74221
7.12024	6.92931	8.20718	8.17633	7.76257	7.79076
3.66458	2.68134	7.00217	6.6526	8.13052	8.04246
2.64941	2.15211	8.3052	8.42106	5.9639	5.7808
6.39856	6.28103	7.91071	7.98741	4.06619	3.85301
3.24531	2.57688	4.81406	4.0507	6.86591	6.82675
4.33105	4.05119	3.42648	3.61056	1.09477	1.16926
0.932689	0.389796	5.27196	4.66493	2.99077	2.32712
2.87296	2.68852	2.79519	2.22192	6.17902	6.0625
7.03937	7.02717	4.14676	3.20293	2.35002	0.889591
4.80251	4.20517	6.0257	6.00005	6.76014	6.5369
1.26865	0.713475	2.87296	2.68852	5.66599	5.6256
6.44095	5.8714	5.77345	5.82885	4.65999	4.59103
4.38934	4.0226	4.40774	3.97751	2.25991	2.27732
4.67702	4.67126	8.6611	8.80854	6.09919	5.95539
3.5087	3.28981	5.20239	4.27623	1.94515	1.28267
2.74319	2.00099	7.4298	7.41817	7.65401	7.48597
5.81094	5.92118	4.54301	4.17004	7.96614	8.23386
1.62475	0.903863	4.89786	3.81314	5.85307	5.98167
5.77345	5.82885	6.46084	6.12286	6.89499	7.05432
6.67905	6.59462	5.62283	5.19581	5.83654	6.1151
4.99855	4.85276	2.74344	1.68341	5.79468	5.76749
2.09319	1.04466	5.92205	5.74475	5.72499	5.74424
1.8367	1.78857	7.01625	6.96628	8.85374	9.06018
5.98698	5.8124	3.4212	2.84436	0.351631	0.241698
3.66641	3.14144	5.18176	5.13637	6.37432	6.25133
4.40774	3.97751	4.53155	4.28239	8.58327	8.68981
8.6611	8.80854	4.15608	4.21043	5.11661	5.26948
3.88512	2.55457	4.38288	3.87504	8.75385	8.8173
5.72521	5.37808	3.83436	3.74127	7.39944	7.64156
3.23886	2.41844	2.26455	0.992109	1.02113	1.2007
1.82128	1.23531	5.64581	5.42185	4.00283	4.022
4.60646	4.1216	4.48152	4.14507	3.3072	4.4436
2.33176	1.98681	4.88487	4.53282	6.23413	6.05193
5.20239	4.27623	6.35567	6.24938	3.61051	3.12465
1.18345	0.188988	2.13707	1.27732	1.10597	1.46997
3.21801	3.10193	4.40371	4.68905	4.45669	4.33956
3.53832	3.72478	4.10145	3.64482	4.81211	4.93805
3.48966	3.28305	5.08238	4.22543	7.73071	7.76349
4.60298	4.66298	5.14326	4.55161	3.38726	3.32979
3.51217	2.94365	3.2284	3.2357	5.08411	4.81201
2.07749	1.15127	7.21731	7.06649	4.81601	4.48797
1.67135	0.64929	6.2726	6.04413	6.46621	6.31197
2.1081	1.62088	3.37624	2.73026	4.87392	4.82288
5.21005	5.08192	8.39696	8.38775	5.57341	5.38871
5.73247	5.52929	6.52602	6.33622	5.21265	5.20155
2.60827	2.33583	4.1904	4.45703	6.27054	6.12473
2.63383	1.94946	5.71376	5.13328	3.33966	3.40869
3.32633	2.98137	4.60281	4.18148	7.21434	7.15175
7.4298	7.41817	3.8059	2.93419	2.69494	2.38909
7.68235	7.23955	6.94851	6.38903	7.97535	7.91616
5.6095	5.00023	6.30117	5.95747	5.7477	5.71342
1.99508	0.755487	3.39975	2.84694	5.65787	5.71606
3.16592	3.01851	7.7984	7.65482	4.69486	4.55027
3.34628	3.35228	4.54629	3.90152	5.30342	5.03737
4.54301	4.17004	5.6573	5.56803	7.59538	7.57696
4.89786	3.81314	3.76948	3.12434	5.41315	5.51457
4.35574	4.13387	5.74213	5.1502	4.54613	4.39872
4.72152	4.28027	4.65963	3.64232	4.41034	4.45241
4.98761	4.61771	3.96416	3.57084	0.306092	0.222631
3.75247	3.70881	3.49109	3.15765	1.91332	2.57988
5.47044	5.34605	4.62841	4.21494	5.55718	5.39866
7.72711	7.89142	3.65574	3.05736	4.03135	3.82767
5.09621	4.87863	5.79597	5.68331	7.61822	7.60079
6.02139	5.75294	6.45371	6.60738	2.31745	1.50708
6.46084	6.12286	7.33512	7.41348	4.76836	4.2468
4.42019	4.351	4.33613	4.04215	5.14526	5.26402
4.42886	4.03335	4.7786	4.28754	7.04984	7.01791
5.47553	5.31396	6.96465	7.04711	5.45631	5.32795
1.45389	1.78136	6.55718	6.58313	5.9569	6.03446
4.42332	4.22147	5.17155	4.19175	4.57405	4.27732
2.45704	1.87762	6.0754	5.53796	7.35648	7.38449
4.52625	4.14582	5.3009	5.09336	7.37578	7.48624
5.62283	5.19581	6.06843	5.95505	8.10322	8.11583
5.51685	4.8927	3.23108	3.09536	2.81468	3.24377
3.61232	3.41993	5.4147	5.11731	5.15863	5.21257
1.05317	0.91237	3.82893	3.35394	3.08195	2.27967
1.75469	1.4264	6.1261	6.18193	5.2203	5.2243
3.25639	2.42399	5.70612	5.40777	4.69685	4.42932
2.74344	1.68341	4.42495	4.29606	4.60915	4.36762
3.87358	3.54036	7.27276	7.17084	6.43854	6.2093
4.61535	4.57058	6.90829	6.86261	3.86187	3.81231
3.71001	3.52721	3.99162	2.85894	7.25385	7.45929
2.21388	2.04784	5.78716	5.38359	4.85674	4.6103
5.9326	5.96776	6.40479	6.55265	6.38228	6.57346
2.56634	2.16261	6.43611	6.289	5.99783	5.93103
5.92205	5.74475	4.81712	4.6658	3.6378	3.70063
4.04684	3.45642	4.88347	3.83783	1.41877	0.875873
4.73826	4.59058	3.78274	3.48377	4.69181	3.12144
7.65905	7.51938	8.26531	8.40226	1.70856	1.50551
4.48575	4.05551	5.22815	5.03592	1.15119	0.456292
4.62734	4.06144	3.18131	2.85545	4.89293	4.54954
2.51022	1.50922	4.07556	3.3673	1.51279	1.27106
3.39798	2.99259	6.65548	6.53785	3.90809	3.53512
3.92658	3.41319	5.42049	5.21911	2.93352	2.47989
2.94487	2.76187	6.72601	6.59925	4.14294	4.06758
3.0801	2.31856	6.13841	6.15026	5.00221	4.8643
4.32848	4.18169	4.03652	2.59294	3.45482	1.91193
7.10109	7.06262	4.43409	3.32331	8.2192	8.28653
2.98172	2.33888	3.34886	3.28939	3.40895	3.26757
2.1106	1.67776	4.60188	4.52684	6.12376	5.98663
2.72624	1.97476	3.54183	2.95587	6.93369	6.67847
3.49458	2.37788	5.91654	5.72547	0.912013	0.352632
5.71364	5.81461	3.39519	2.90477	4.40862	4.31471
1.96385	0.901587	4.60403	4.6975	3.37498	3.73897
2.07145	1.66371	4.05863	3.62863	4.61456	4.57494
5.02614	4.16047	6.62504	6.4165	5.94979	5.89739
5.60933	5.14534	4.29541	4.10877	6.54207	6.72716
3.31446	2.96112	5.18795	5.33931	4.44289	4.57768
5.08325	4.64929	4.24487	3.4161	5.49646	5.32427
2.94119	2.10355	4.04466	3.45309	5.33405	5.08719
2.10849	0.995286	5.73889	5.31672	4.05837	3.92561
8.39864	8.5066	5.03151	4.69362	5.42398	5.64802
1.93602	1.96039	7.68141	7.60705	1.18712	0.42183
7.01625	6.96628	5.17519	5.02963	4.3355	4.33707
0.612645	0.381696	5.43444	5.08175	4.57681	4.53871
5.21479	4.75936	6.32238	5.63862	6.20499	6.12936
5.06057	4.55296	6.37661	5.94717	7.53285	7.50195
2.61528	2.21678	4.10814	3.58878	5.1668	4.58047
3.77565	3.36769	4.89305	4.51266	4.06452	3.38883
3.36544	2.70124	6.38296	5.92517	6.1874	6.31859
4.03335	3.2336	5.78293	5.9774	5.74184	5.9968
4.65143	4.33986	3.58815	2.79547	2.77667	2.4495
4.28456	4.43766	3.73716	3.13982	2.60965	2.2136
2.85451	2.44559	4.06717	3.9179	4.52028	4.53975
3.4212	2.84436	4.95146	4.39597	6.786	6.70133
2.0316	1.97745	6.12071	6.15845	6.89652	6.88666
5.18176	5.13637	4.05055	3.96388	3.47726	3.425
2.83108	1.94353	3.59129	3.43105	7.68605	7.69781
5.00206	4.97887	5.87296	6.01965	6.33691	6.29871
2.06075	1.41095	3.87768	3.03839	6.84148	6.62052
4.97222	4.66636	5.23829	5.01429	3.99283	3.5464
6.69394	6.69056	6.59852	6.5195	4.72913	4.6174
4.53155	4.28239	4.86635	4.67007	6.37188	6.36932
5.5107	5.14377	5.02252	4.86487	5.05106	5.17199
3.37547	1.61341	3.76991	3.6078	0.285717	0.912749
3.37661	3.41868	3.21549	3.10002	9.8989	10.0184
4.06503	3.63242	7.51369	7.60889	8.14951	8.2682
6.38238	6.56594	4.60637	4.25208	4.73194	4.66428
6.73158	6.40453	4.69391	3.51307	8.80789	8.78531
4.65237	4.28978	2.98157	2.4218	6.85176	6.8745
5.93784	5.47843	8.89632	8.99736	1.19419	0.671472
2.57168	1.74248	6.82578	6.68779	5.36134	5.39829
1.57533	0.880431	4.46096	3.71544	8.69468	8.7249
4.24107	4.02976	6.28034	6.36792	8.02796	8.14365
3.98844	3.39405	4.26576	3.26731	2.6339	2.54668
1.69704	0.915985	4.59663	4.67417	5.47026	5.27805
3.21306	2.39365	5.67707	5.55116	3.97554	3.73252
3.10123	2.43165	4.77291	4.43947	11.1324	11.2599
2.10482	1.44062	4.69198	4.47507	6.10958	6.12465
2.37276	1.65583	6.21351	5.93226	5.2621	5.34453
3.97002	3.62962	4.63732	4.55011	5.82834	5.64734
4.06655	4.03365	4.37149	4.56397	7.99303	7.93977
3.88219	3.86285	5.81699	5.45134	1.97668	1.72329
1.2436	1.17019	6.65948	6.48166	2.82759	2.11293
2.15224	1.7111	2.91397	2.36295	6.58739	6.61065
4.416	3.99583	1.54901	0.301569	5.15743	5.2296
4.93005	4.78991	4.47691	3.16576	4.85974	4.55861
2.0293	1.51717	4.21141	3.63341	4.1889	4.34418
2.92703	2.614	6.53234	5.84692	6.91889	6.78233
4.15608	4.21043	4.40552	3.93399	6.61695	6.75016
2.56119	1.81185	5.91228	5.51029	6.29415	6.46473
2.27178	2.10234	3.29472	2.96727	1.04622	1.08829
3.36888	2.19163	3.78415	3.25035	7.11224	7.06873
0.439723	0.2594	6.26932	6.35225	7.29807	7.24088
3.82402	3.3186	7.1879	7.06663	4.55478	4.63476
2.63024	2.37686	2.97222	2.97287	4.04636	3.90173
2.53235	2.04835	5.49768	5.6281	5.2729	5.08468
3.82506	3.19743	7.01602	6.93026	3.79713	3.75947
2.00067	1.17203	6.0497	6.18089	2.03111	2.75125
6.80111	6.51416	3.72035	2.53236	7.2138	7.15042
6.70596	6.73831	4.91332	4.08925	2.99987	3.06009
2.12779	1.66896	2.81873	2.09675	5.58906	5.97962
6.20104	6.14841	3.20384	2.33297	1.06854	1.11061
4.01817	3.49771	4.52283	4.55618	7.22113	7.22121
4.38288	3.87504	5.22517	4.59733	3.83281	3.28992
1.44235	1.14562	5.46656	5.02081	7.12149	7.19646
6.78002	6.78817	4.87911	4.09401	4.79669	4.83216
5.68563	5.52535	5.10087	4.18421	8.86441	8.90451
2.83163	2.05885	4.50662	3.56746	5.29915	4.58124
3.83436	3.74127	6.88844	6.74735	1.61005	1.13129
4.24648	4.22569	6.91312	6.47595	4.8906	4.82164
2.26455	0.992109	3.92649	3.14543	6.53693	6.55846
4.69865	4.34145	4.59982	4.43113	6.58613	6.63456
2.20354	1.32362	5.49964	5.00616	5.98068	5.8903
4.88815	4.72931	4.42931	4.13619	7.54669	7.50939
5.64581	5.42185	6.06118	5.91462	3.74427	3.50762
4.72043	4.35792	3.63735	2.97776	8.11615	8.17065
4.48152	4.14507	5.41532	4.99004	0.729926	0.994387
3.66867	2.85542	5.14672	5.09446	3.93924	3.5801
2.91599	2.20248	7.79182	7.60462	4.06796	3.72866
3.8167	3.6305	4.33933	3.95573	5.85416	5.86914
4.88487	4.53282	5.5726	4.56521	5.57295	5.56313
4.36146	3.89071	3.98075	4.53804	7.78168	7.6011
3.64028	2.90166	7.03078	7.14522	5.83966	5.48071
1.57077	0.750342	6.22326	6.20276	6.33543	6.53582
2.99677	3.12738	5.26619	5.04066	5.70853	5.69378
0.799327	1.71587	3.99494	3.62197	4.65079	4.3346
6.35567	6.24938	3.68015	3.48569	5.30499	5.21118
6.13121	6.04546	4.49559	4.03778	3.27541	2.68945
2.13707	1.27732	6.38726	6.18489	2.47565	2.41338
5.44924	5.00358	5.52877	5.45126	6.72573	6.78417
9.56317	9.482	3.90824	3.61104	4.64464	4.52525
0.678412	0.448677	6.23433	5.91712	1.50407	1.33969
2.29845	1.91167	5.04751	4.69236	1.52651	1.26902
3.68646	3.70777	5.05148	5.18581	4.23736	3.97581
2.74419	2.35132	3.19461	3.36792	3.89736	3.6883
3.74983	3.4464	0.967417	0.453093	6.19718	6.29227
3.6108	3.66839	6.13707	5.8186	7.25056	7.27481
3.70368	2.96487	4.42741	4.7183	5.57488	5.51364
4.14705	3.90396	4.38133	4.06083	4.95311	4.88737
4.40371	4.68905	6.46461	6.05214	4.52774	4.47769
2.32338	2.16515	4.21809	3.95204	6.70565	6.43938
4.10145	3.64482	4.15938	4.26495	4.69768	4.48551
4.65301	4.26641	4.96849	4.85732	6.83419	6.63307
4.34854	4.1712	6.86591	6.82675	6.1127	6.10329
4.35787	4.28891	6.96422	6.58236	7.85416	8.00524
3.95166	3.53429	4.08325	3.66589	9.72225	9.73048
5.08238	4.22543	4.33737	4.2219	4.6034	4.55842
4.26087	3.62256	2.76462	1.99934	4.59301	4.51597
3.85047	3.52217	3.84479	3.49759	8.93486	9.08506
5.14326	4.55161	6.75024	6.44967	6.09412	6.0944
3.33959	3.44725	4.16695	3.85112	4.73673	4.45943
4.18048	3.61126	6.6041	5.991	6.59453	6.57722
3.2284	3.2357	3.24112	1.97402	8.8361	8.8155
5.7138	5.61136	4.27552	3.72433	7.63298	7.74621
2.77483	2.71582	5.13119	4.83066	1.59371	1.35824
3.07605	2.92548	5.46369	5.25235	9.60732	9.47264
7.21731	7.06649	5.68038	5.12718	4.39923	4.91475
5.30176	5.04076	4.79672	4.82798	5.87646	5.99094
0.784973	0.00392029	5.69364	5.75125	8.18874	8.34602
4.76456	5.05551	5.45908	5.49807	7.39747	7.51871
2.53284	2.3932	6.09919	5.95539	2.88932	3.2626
1.6879	1.067	6.40308	6.54153	5.31498	5.51833
4.19905	4.27265	4.04368	2.89179	6.47201	6.59925
3.57543	3.32351	5.63093	5.22728	3.53134	3.50215
6.2726	6.04413	5.40973	5.4028	5.60759	5.62467
4.75589	4.21136	5.13962	4.08791	4.32673	4.07719
3.11768	2.54036	5.85307	5.98167	2.47201	2.39209
3.37624	2.73026	5.82803	5.31727	4.08903	4.04864
1.24376	0.721932	5.34806	4.81135	2.46754	2.80917
4.54334	3.96526	6.64488	6.56056	3.65218	3.9991
2.69809	2.22559	5.60466	5.69521	7.14846	7.39298
2.66851	2.04265	5.83654	6.1151	4.25137	4.22155
4.59332	4.36331	7.45072	7.3003	5.5346	5.38602
4.09567	3.22655	5.06773	3.31893	6.80124	6.99969
8.39696	8.38775	3.61213	2.76853	5.50699	5.51024
2.38315	1.78367	5.64677	5.07719	1.85305	1.51179
2.07519	1.81918	3.94713	3.48543	5.81352	5.54202
3.95666	3.64118	5.82538	5.83488	3.46768	3.0197
6.52602	6.33622	6.37432	6.25133	7.01308	7.10649
4.1904	4.45703	8.58327	8.68981	5.03736	4.83564
5.71376	5.13328	6.43941	6.54315	8.37286	8.39202
4.60281	4.18148	5.94165	5.65404	4.28093	4.13303
2.4498	2.16994	6.40412	6.01785	5.92574	5.82934
4.65503	4.34379	5.12322	4.75598	5.60112	5.75088
2.94575	3.06582	5.93877	5.38352	5.54119	5.66148
3.8059	2.93419	4.45669	4.33956	7.19541	7.37662
3.20606	3.17247	7.73071	7.76349	7.10481	7.35598
4.18654	3.57653	4.6756	4.32682	6.49597	6.38752
3.24507	2.03676	5.14072	5.13075	6.6641	6.80762
3.71014	3.09355	4.63604	4.69033	3.41318	3.21625
1.59818	1.36723	4.81601	4.48797	4.5222	4.06104
3.13216	3.74127	6.46621	6.31197	7.76754	7.88723
3.72204	3.45347	7.43257	7.59925	5.84516	5.75041
6.94851	6.38903	6.64103	6.47511	4.41757	4.38035
3.66381	2.78585	7.293	7.31173	3.14655	2.98081
4.37022	3.79984	5.5225	5.3451	7.86052	8.01068
6.30117	5.95747	4.71872	4.68551	1.51826	2.53761
4.45988	4.63028	5.93692	5.6597	5.96861	6.01068
3.37048	3.09536	5.57341	5.38871	7.56345	7.62531
3.27664	2.66664	5.09997	4.68006	3.78796	3.42748
1.80229	0.024183	6.24217	6.15683	4.1248	3.6721
5.83525	5.38547	6.98032	6.87381	5.66988	5.72026
5.39726	5.30056	6.82175	5.99073	2.8454	2.57935
4.72705	3.49043	5.89562	5.92302	1.57663	2.39631
3.01491	1.90305	5.42437	5.4561	5.69431	6.0019
3.10935	2.54764	8.18167	8.45723	0.807646	0.527787
0.527433	0.672596	2.56314	1.16939	5.15582	5.18421
4.88077	4.21797	7.59538	7.57696	5.90819	5.79549
2.72429	1.73939	5.57333	5.08699	2.74462	2.46019
4.34065	3.48475	5.22401	5.19433	5.90838	5.52068
4.34582	4.11327	5.69498	5.61559	2.47579	2.50058
2.77927	1.9199	6.88225	6.67711	2.86735	2.68703
3.98881	3.61585	3.61679	3.51447	6.74861	6.71398
2.3331	1.80198	5.04261	4.87723	0.767103	0.639248
4.15366	3.92217	5.98068	5.69765	7.89698	7.1087
2.64124	2.73675	3.42234	2.34242	4.24648	4.10175
3.08955	2.72133	4.231	3.47526	8.87964	9.0239
5.4686	5.24839	6.22703	6.01974	7.60752	7.60538
3.39975	2.84694	5.55718	5.39866	3.77041	3.70097
7.7984	7.65482	5.13475	4.1021	4.3665	4.48987
4.66691	4.40723	5.84762	5.77619	8.51921	8.6823
1.48036	1.27732	5.14618	4.82337	5.66611	5.83371
2.08986	1.51767	6.33479	5.91528	7.66204	7.72698
4.79586	4.79641	7.61822	7.60079	2.96395	2.90293
5.00969	4.84718	4.83378	4.98802	6.093	6.11589
3.12267	3.26567	7.05909	7.29736	5.56961	5.624
1.08566	0.694765	4.5836	3.66016	8.16553	8.02486
3.89717	3.95318	5.73045	5.74252	0.682711	0.876783
3.55244	3.35781	5.8929	5.87899	3.16911	2.95879
0.921592	0.615738	6.16144	5.88278	3.42558	3.45135
8.47861	8.46163	6.1072	6.14268	6.74128	6.97158
3.95662	3.33311	4.92134	4.6322	10.7223	10.7966
2.7883	1.83037	6.50329	6.29768	12.2636	12.4165
3.03319	2.32161	8.86567	8.9619	5.98049	6.2787
4.54629	3.90152	5.58008	5.1092	2.53728	2.86886
4.54165	4.33188	5.89922	5.41022	8.1318	8.22485
3.46526	3.14426	5.14526	5.26402	3.22925	2.84286
6.74853	6.45888	5.9569	6.03446	3.17575	2.67033
3.53481	3.09051	5.50801	4.80024	6.22354	6.08775
1.30925	0.534186	7.35648	7.38449	4.18233	3.73897
2.46162	1.46556	6.43067	6.14787	5.4417	5.3032
5.6573	5.56803	5.30895	5.4042	1.97222	2.12976
3.58022	2.65245	4.73201	4.27289	4.37926	4.63338
3.70441	3.87021	5.31207	5.22652	1.52476	1.69236
2.1889	1.10811	5.17823	5.21459	9.71002	9.90828
3.76948	3.12434	5.15863	5.21257	4.82323	4.5856
3.25267	2.55777	5.58633	5.47104	4.04664	4.06433
3.97323	2.93123	3.87781	2.89665	4.64124	4.78828
4.01348	3.68062	5.08043	4.93608	6.57824	6.78688
4.56016	4.23796	7.75559	7.40555	6.19322	6.02642
5.84479	5.3707	4.80903	4.18552	7.94292	7.96685
1.95175	0.930629	4.14561	3.78493	8.70048	8.77525
4.41955	3.28463	5.54816	5.0866	7.57941	7.48992
2.57666	1.98365	4.60915	4.36762	7.61174	7.74696
3.07503	3.20591	6.43854	6.2093	9.92045	9.99396
2.01069	1.61219	7.40327	6.96715	6.17766	5.95054
3.21684	3.17723	3.21774	3.04656	5.39164	5.2829
5.74213	5.1502	7.61816	7.35334	3.00298	3.29586
3.27123	2.32853	3.77696	3.00971	2.97222	2.66065
4.65963	3.64232	5.29322	5.07337	7.47597	7.5248
3.96416	3.57084	7.25385	7.45929	6.08018	6.26016
4.05251	3.80917	7.06814	6.77982	8.34808	8.35668
5.90336	6.09598	3.33479	3.27732	2.33479	1.75125
0.849598	0.461033	7.35106	7.24822	7.69025	7.77604
2.69447	2.45275	7.24489	7.3342	5.98099	5.95869
2.85457	2.1311	5.35073	5.35057	1.97422	1.50172
1.59051	1.25407	4.69181	3.12144	5.05489	4.86735
3.49109	3.15765	5.41866	4.83321	3.76288	3.65439
2.37721	1.41018	5.34464	5.36694	8.43662	8.49749
2.87357	1.48859	6.65404	6.49541	5.20388	5.32515
3.47456	2.93166	5.26869	5.37838	4.17405	4.38605
4.62841	4.21494	3.97502	3.53334	0.137922	1.70355
1.33654	0.250849	3.90809	3.53512	5.11567	5.15774
0.521137	0.170889	5.69284	5.80705	6.6526	6.76231
2.89069	2.82842	4.44786	4.34133	5.95757	6.00698
3.65574	3.05736	8.10028	8.00892	6.65987	6.56737
2.41752	1.5665	4.5928	4.53471	0.993177	1.2417
5.79597	5.68331	5.27281	5.02057	2.32014	1.84436
3.45117	2.68858	6.57362	6.51891	1.21323	1.2553
2.54404	1.81352	6.93369	6.67847	5.33817	5.10294
6.45371	6.60738	5.9937	5.85156	2.09775	2.84026
2.34505	1.35761	4.67737	4.6178	5.31004	5.27522
7.33512	7.41348	2.06414	1.52125	5.58512	5.53329
3.01163	2.45135	3.93861	3.79427	6.55426	6.90591
2.48498	2.44905	3.95534	3.28846	3.90101	3.94308
5.89357	5.67998	4.79479	4.87899	5.46258	4.75166
2.31482	1.75422	4.91483	4.35934	2.2251	1.47249
3.68862	3.55873	4.11807	3.36659	4.87336	4.84466
1.92574	1.28974	5.44484	5.0042	1.86416	1.27236
4.33613	4.04215	6.00913	5.55155	1.52076	1.27332
3.83907	3.24856	4.60203	4.53719	5.82244	5.97699
4.36288	4.37815	7.09533	6.97222	6.265	6.48026
1.4279	1.08664	4.44289	4.57768	7.47749	7.3719
4.69962	4.53666	5.11114	4.79824	5.05937	5.07853
4.12312	3.57383	8.30238	8.24825	4.15573	4.17355
3.11953	2.78309	7.53285	7.50195	6.23375	6.37486
4.48531	4.51179	10.3841	10.5441	1.94474	2.09372
1.30925	0.910749	4.12074	3.82907	4.87828	4.73713
4.0903	3.74445	6.37188	6.36932	10.9053	11.0107
2.64051	1.60924	4.79144	4.42672	4.18051	4.27732
1.37643	1.15056	9.8989	10.0184	5.96802	6.03097
7.42225	7.46054	9.47749	9.49592	4.18817	3.64352
2.56128	2.87184	8.02796	8.14365	6.96133	7.18059
6.93298	6.99659	2.70528	2.55972	1.03955	0.56315
4.1913	3.43541	6.10958	6.12465	2.05129	1.4495
2.52762	2.08242	5.2621	5.34453	4.38638	4.29645
4.7786	4.28754	7.99303	7.93977	5.14407	5.07665
5.89833	5.71156	6.11575	5.98845	6.2835	6.3023
2.63498	1.97179	2.30596	1.63182	6.95452	7.13894
4.02063	4.39318	6.32367	6.23204	6.05787	6.19441
3.45095	3.22453	8.16763	8.0967	5.26131	4.90181
2.08364	0.501217	5.31237	5.03346	8.23653	8.11212
1.77024	0.925967	4.85974	4.55861	8.62918	8.6814
1.97809	1.05493	2.62131	2.66338	7.78822	7.53868
5.84083	5.84612	3.68812	3.22769	3.54404	3.12338
6.96465	7.04711	6.61695	6.75016	8.66211	8.65061
4.38586	4.70138	6.29415	6.46473	6.15014	6.02775
1.96832	1.22756	8.23062	8.30464	3.30925	2.57371
2.80872	2.45486	3.46148	3.64915	8.30134	8.44725
3.13559	2.70744	2.97788	2.18448	2.719	2.82666
6.55718	6.58313	3.2897	3.13147	5.74274	5.80539
5.17155	4.19175	3.90889	2.74237	4.3264	4.52855
7.48924	7.53735	6.57328	6.32795	9.35999	9.44739
3.03883	2.09968	6.28187	5.96453	6.9495	7.13134
2.11558	1.90239	5.39007	5.36743	0.5185	0.429325
3.04521	2.46134	4.75728	4.10127	8.02322	8.29632
1.93269	1.58244	0.672908	0.130015	3.29111	2.83675
3.41857	2.02454	8.27402	8.13631	3.94837	4.19207
6.0754	5.53796	4.17644	2.93007	4.90201	4.95915
4.15049	4.17769	3.79713	3.75947	4.43633	4.34648
2.07246	0.709592	4.68215	4.47706	2.67786	2.87193
1.5865	0.74021	5.96422	5.8205	5.41192	5.20797
4.15449	3.32876	7.2138	7.15042	7.89607	7.90087
3.29887	2.12794	4.33308	3.62213	6.65596	6.30753
3.70381	3.89545	6.71503	6.93196	5.76283	5.73322
5.40487	5.04798	6.1892	6.06074	4.88545	4.6119
5.77696	5.49514	5.58794	5.67791	5.77324	5.90396
1.33271	1.42058	5.97708	5.79068	4.90268	4.65474
5.14214	4.36566	5.06346	4.75584	5.22143	5.05646
3.47186	3.47709	4.19618	4.02526	6.33378	6.51442
5.3009	5.09336	3.82731	3.42686	6.06386	6.0412
3.38726	2.48447	2.35424	2.13328	6.84268	6.52546
5.01104	4.64232	5.8075	5.50513	6.35499	6.59925
3.32164	3.0325	8.86441	8.90451	4.26729	3.82893
3.56359	2.78804	5.41675	5.41197	4.26056	3.98852
1.76657	0.859959	4.48254	4.25902	7.68083	7.49223
2.95384	2.73604	6.42465	6.2352	6.99606	7.00826
3.576	3.30944	4.56156	4.57716	4.67469	4.63786
6.06843	5.95505	6.33713	5.24085	5.60825	5.40846
3.23108	3.09536	4.09775	3.47461	3.2534	3.68779
5.4147	5.11731	4.18759	3.67786	2.60609	2.2007
1.24111	1.20301	6.29714	6.18795	7.24071	7.30751
2.11932	1.13164	4.4303	3.8613	4.46972	4.49161
3.63384	3.17571	7.61478	7.81526	4.40665	4.22572
1.77477	1.69655	4.25911	3.85788	5.07175	5.16113
2.41853	2.4606	2.9421	2.2951	4.35787	3.64505
2.8517	2.43434	2.80229	2.32979	6.47141	6.32754
3.19069	2.49893	6.42875	6.02562	1.11623	1.2958
3.82893	3.35394	5.87372	5.53512	3.28799	3.21459
3.01259	2.40121	5.86064	5.5251	6.14018	6.0333
6.88999	6.8426	5.96682	5.92548	3.05468	2.75279
4.67306	4.4267	4.61079	3.31829	3.39887	3.12643
1.90726	0.788867	4.51019	3.47426	4.13065	3.90737
6.1261	6.18193	6.58613	6.63456	7.88223	7.89596
3.48241	3.05736	7.54669	7.50939	9.40501	9.52787
2.85925	2.25542	5.32333	4.22447	4.68367	4.42212
3.37309	2.65574	6.18192	6.22399	5.96639	5.87387
3.09313	2.11812	8.51885	8.74711	9.8272	9.8569
6.24606	6.17219	3.51031	3.03392	5.51505	5.56777
3.74351	2.83875	8.0758	8.14958	5.68136	5.41353
1.90572	1.97476	2.52101	1.77253	3.12613	3.78711
1.90111	1.22117	3.92431	3.08676	3.54088	3.75578
5.70612	5.40777	2.95547	1.28788	6.76568	6.41162
2.95172	2.34171	4.17942	3.38814	4.51971	4.58063
3.28772	2.80784	4.96169	4.95539	2.51193	1.83577
3.5984	3.10543	4.20565	4.26085	2.88131	2.47272
4.05686	3.7043	5.00657	4.71606	6.49163	6.61744
5.63225	5.27142	5.49788	5.69749	5.35122	5.24987
4.42495	4.29606	6.74433	6.94054	2.68776	2.55296
1.03933	0.0370071	8.05581	8.07862	9.14741	9.08941
2.54685	2.55537	5.70853	5.69378	5.48679	5.52886
7.27276	7.17084	4.65079	4.3346	4.66821	4.34771
5.06193	4.69147	5.20873	4.7277	7.83655	7.92018
3.99024	3.86142	4.5751	4.21984	4.98279	4.84569
1.85674	2.13328	6.72573	6.78417	6.32271	6.41094
3.52651	3.54586	6.3179	5.99648	4.64835	4.61181
1.70918	1.63096	5.51753	4.73531	1.38086	1.42293
4.22243	3.63922	5.2569	5.14952	5.34069	5.6343
6.90829	6.86261	5.42564	5.42578	0.243599	0.672692
3.99162	2.85894	6.3747	6.31897	7.21112	7.19103
4.62098	4.22625	4.23736	3.97581	5.78723	6.17394
5.78716	5.38359	6.19718	6.29227	8.26774	8.20686
2.54247	2.17737	7.25056	7.27481	5.00079	5.2355
4.22675	3.93429	1.49736	0.977546	6.51204	6.48918
6.40479	6.55265	4.0613	3.6504	2.09161	2.22115
2.34335	1.39312	7.85416	8.00524	2.9121	2.39958
5.71973	5.79685	2.36955	1.34123	5.38011	5.48997
3.73615	3.86001	9.72225	9.73048	5.12086	4.90393
4.82142	4.25725	5.10851	4.78021	5.54952	5.29215
3.20796	2.94432	4.97708	4.74735	4.87205	4.31495
1.4279	0.967466	4.7253	4.40067	4.57556	4.3871
0.593046	0.635115	3.16891	3.70848	3.79193	3.93512
4.69538	3.90737	5.945	5.94525	3.79744	3.70201
6.43611	6.289	4.59301	4.51597	2.28772	2.1074
2.98789	2.76692	4.54753	4.18421	6.29555	6.14637
4.99859	4.67899	4.78443	4.34753	5.03485	5.38749
3.24056	3.0843	6.59453	6.57722	8.50051	8.51172
3.49015	2.61429	4.6901	4.60811	4.62864	4.55345
2.85064	1.94842	3.25601	3.39762	2.16708	1.77852
5.13137	4.65943	5.06242	4.53119	4.75191	4.53966
4.81712	4.6658	5.87646	5.99094	5.70351	5.35824
7.17066	7.53973	8.14866	8.0979	4.97485	4.92328
3.3176	3.12794	4.599	4.68171	5.52283	5.52078
4.88347	3.83783	4.09048	3.56749	6.41223	6.28837
5.06177	5.08366	3.96779	3.42822	5.11702	5.28234
3.78274	3.48377	6.99328	7.10424	5.48959	5.07569
5.75998	5.80757	5.03382	4.7838	6.06552	5.9892
4.38315	4.00489	7.81065	7.62324	6.08827	6.03276
3.15535	3.13602	4.50574	3.35974	5.76363	5.77328
10.5792	10.7207	4.66897	4.85543	4.7683	4.48844
2.90007	2.66796	3.71283	3.5434	3.74415	3.63973
6.09121	6.3072	3.74049	3.27732	4.51223	4.45997
8.26531	8.40226	4.28072	3.70654	5.41857	5.44847
5.22815	5.03592	4.27293	3.52359	8.04863	8.15679
6.14866	6.04017	5.7569	5.25989	3.33673	3.20547
1.42488	1.01629	6.50446	6.35541	11.3896	11.5526
2.90465	2.11445	4.32354	4.1222	5.0151	5.24906
4.22341	3.67239	5.44882	5.21161	7.3874	7.48061
2.72711	2.60568	7.13022	6.95984	4.16868	4.12829
2.33387	1.9609	4.20824	4.07541	7.34607	7.20693
6.47279	6.46432	4.53036	4.11063	4.97222	4.76053
4.39672	4.25821	6.05987	5.90598	10.5473	10.6979
4.11507	3.48198	7.21263	6.75613	6.60717	6.91376
1.28645	0.12499	5.13424	5.2231	2.15346	3.48503
4.79756	4.16915	5.33441	4.92879	6.44026	6.27083
5.50039	5.17914	3.63532	2.98551	4.02566	3.71263
3.84234	3.88441	5.75967	5.6902	7.98135	7.87421
2.88399	2.33132	7.67566	7.37053	3.03871	3.08078
2.27396	1.98345	6.24737	6.13926	3.83914	2.94133
3.09775	2.11494	6.63196	6.25669	5.66739	5.20681
3.18131	2.85545	6.95283	6.85526	3.80894	3.43912
1.7902	1.07328	6.4935	6.2855	1.262	0.212918
5.48453	5.13774	4.70207	4.11697	5.63051	5.7469
5.26273	5.13912	5.28143	4.64083	2.97044	2.64994
5.32926	5.18722	5.98207	5.58734	7.63486	7.76917
1.62541	0.313847	5.86119	6.10489	3.78274	3.46997
4.75705	4.80917	4.60609	4.72478	2.17867	2.9577
5.17339	4.44666	6.18044	6.07743	6.04942	5.52697
4.07556	3.3673	4.72347	4.72424	4.35096	4.53373
3.3584	2.84793	1.98732	1.50744	6.36985	6.44784
2.73365	2.81319	5.65672	5.75873	3.51454	3.55661
4.67467	4.61663	5.59219	5.42457	7.67781	7.62626
1.40861	1.13173	4.06017	3.28554	9.81835	9.93597
5.04561	4.54937	4.70632	4.30736	7.18244	7.33055
5.46127	5.15397	5.92774	5.44725	2.11756	1.74459
3.62557	3.22018	2.62598	1.82851	3.38581	3.52828
3.76715	3.58011	6.47201	6.59925	5.334	4.86072
2.16873	1.6658	5.06619	4.14674	8.57626	8.47449
5.28776	5.17355	4.04718	3.63096	2.36353	1.33951
5.42854	4.90052	6.27784	5.96023	8.95581	9.10305
3.88571	2.91965	3.6402	3.0782	5.10112	5.30899
6.5637	6.20738	6.24484	6.13862	4.9665	4.55877
4.03899	3.99902	4.22563	3.78869	6.6208	6.31717
5.01232	4.68646	4.68874	4.66306	6.76928	6.89083
6.65548	6.53785	5.81047	5.64232	6.75063	6.65322
3.47472	1.97776	4.16315	3.38313	2.19086	1.87678
5.42049	5.21911	5.48177	4.93182	5.31705	5.08468
7.57901	7.25942	2.47201	2.39209	5.86096	6.04219
6.72601	6.59925	0.786351	0.676417	5.64253	5.15324
5.68729	4.94936	3.51536	3.9294	6.38708	6.46722
3.52756	2.90466	6.80124	6.99969	2.51876	2.49372
7.11744	7.26748	5.33314	5.05328	7.15855	6.96025
2.69822	1.97476	4.48226	4.1923	1.02012	0.312167
4.68072	4.04735	4.70842	4.07379	3.03164	2.02741
5.4315	4.7598	3.82953	3.67282	4.46874	5.46875
1.12121	0.763669	6.2583	5.73534	2.15055	1.97581
7.13752	7.08385	4.15455	4.11532	3.03039	3.14497
3.73538	2.91311	4.78913	4.36281	3.80443	3.86086
3.27906	2.98905	3.60902	3.39144	5.25996	5.08586
3.05277	2.526	5.4191	5.16113	9.19501	9.25972
6.13841	6.15026	3.95232	3.57935	3.91332	3.54036
4.03652	2.59294	0.787793	0.370431	3.98618	3.38804
4.79401	4.47187	7.24553	7.23458	4.35899	4.42069
3.8777	3.64769	6.85245	6.56585	3.071	3.29239
4.3254	4.50871	5.03736	4.83564	0.491091	0.755553
4.43409	3.32331	3.03423	2.3898	4.20737	3.95798
4.15409	3.75402	3.51279	3.23935	5.94333	6.05027
2.21733	1.37488	6.66527	6.56747	9.63057	9.65365
3.34886	3.28939	3.82284	3.49294	4.46061	4.12416
2.78016	2.30565	7.98529	7.89648	5.45119	5.23152
1.82538	0.867446	5.96263	6.09555	6.86133	6.97889
3.8696	3.27732	5.41968	5.08978	1.0899	0.880431
3.44954	2.89645	4.21456	3.99907	2.86285	2.27977
4.60188	4.52684	5.15279	4.65583	4.89118	5.31914
4.08503	3.63824	5.4065	4.88496	0.678035	0.000211826
3.54183	2.95587	5.00926	4.67777	4.43489	4.24901
5.91654	5.72547	7.19541	7.37662	2.73615	2.19326
3.39519	2.90477	4.46897	3.3642	1.3375	0.716606
0.851705	0.0193051	5.6536	5.54741	3.74983	3.10223
4.60403	4.6975	4.86109	4.21376	3.17867	0.89881
0.8953	0.200404	2.47152	2.54397	5.61459	5.20462
4.05863	3.62863	4.42014	3.77853	5.60488	5.45932
6.62504	6.4165	4.75011	3.59811	2.82322	2.76146
3.8835	2.60655	7.83835	7.8198	5.84726	5.73733
5.5986	5.2526	5.88159	5.69906	1.87744	2.07151
5.12761	4.4747	4.86631	4.36809	2.72907	2.30647
4.29541	4.10877	4.03588	3.52886	5.19058	5.11453
1.84039	1.48513	4.6806	4.48729	6.06185	6.11259
3.3577	2.29095	5.87911	6.01868	3.18817	3.00898
5.18795	5.33931	4.38388	4.3281	3.43335	2.7475
6.31461	6.16113	6.49597	6.38752	2.89508	2.85276
0.357508	0.206932	6.12565	5.96637	10.3053	10.3626
3.05605	2.63578	4.06617	2.52047	7.59759	7.43628
2.85869	2.19715	4.79965	3.98441	5.46938	5.4771
3.85081	3.49491	8.29479	8.24928	6.66939	6.62031
4.24487	3.4161	4.10346	3.71649	4.84367	5.03308
4.04466	3.45309	5.21733	4.51993	4.96548	4.81674
5.73889	5.31672	4.04492	3.15914	5.60068	5.73943
4.45319	4.04	4.33543	4.36387	2.77007	3.18251
4.46386	3.93421	7.76754	7.88723	8.06082	7.89578
3.56046	2.82117	5.20411	4.94056	3.63435	3.53992
3.72068	3.58342	4.86776	3.29619	6.06392	6.08896
4.54177	3.89862	5.57759	5.47484	4.8262	4.75279
2.94983	1.87289	4.41757	4.38035	1.39343	1.19449
2.16408	1.08657	3.78612	3.51408	2.61573	2.61341
2.76139	2.44892	6.43562	6.30974	3.79165	3.31914
3.95916	3.64614	3.57755	2.16785	3.33928	3.22702
5.03151	4.69362	5.28282	4.97341	4.97426	5.10235
2.9337	1.85916	6.31595	5.34914	4.84902	4.90777
7.68141	7.60705	5.52803	5.34771	3.23061	3.17646
5.20185	5.2374	5.84864	5.01798	4.8595	4.89438
2.66045	2.03955	5.18475	4.75204	6.56918	6.50499
3.51089	3.14487	3.76959	3.52786	1.14082	1.09542
4.32056	3.65256	4.1248	3.6721	4.78761	4.71535
5.17519	5.02963	3.84531	3.19932	5.14086	4.90025
3.98496	3.46778	5.32044	5.38192	5.63892	7.27611
4.17867	3.48377	3.91202	3.76917	5.2644	5.45486
1.58111	1.37525	4.01331	2.75704	5.35121	5.30492
2.86463	2.27556	3.76724	3.97555	5.14055	5.0029
2.92056	2.89336	7.5774	7.81748	3.89649	3.78367
9.2287	9.14961	3.36415	2.8757	10.2844	10.3399
3.02092	2.52907	5.69431	6.0019	6.7276	6.8261
4.60227	4.22188	4.50938	4.0984	7.55089	7.57792
3.70632	4.0285	3.22328	2.58728	2.36454	1.59925
4.01959	2.91694	3.95262	2.8303	7.24711	7.37004
2.69642	2.58405	4.53866	4.15321	4.46202	4.56822
5.43444	5.08175	5.1075	4.71661	3.80229	3.15595
8.18631	8.13993	5.02431	3.82257	2.70213	2.72712
5.19326	4.70633	0.662362	0.119469	5.22597	5.1212
4.37009	4.24155	6.0742	6.02039	4.80283	4.8594
6.32238	5.63862	4.05991	5.80753	4.82021	5.09336
5.1037	5.38174	6.51138	6.77418	6.52208	6.30537
3.52156	3.36508	3.45473	2.95794	3.02611	2.85059
2.44607	1.22186	5.46882	5.61346	4.46128	4.3519
2.29372	1.17352	5.80528	5.50724	4.05817	3.86461
6.37661	5.94717	3.80546	2.99499	6.36238	6.41476
4.10814	3.58878	4.20069	3.92629	1.84264	1.88471
4.19505	4.35741	4.08607	3.82948	3.19153	2.34052
1.58356	0.839029	4.1015	3.82164	4.94813	4.78711
3.06165	3.42091	4.62866	3.62197	6.28912	6.34995
4.09864	3.4646	4.50519	4.40112	3.16486	2.97247
2.43165	2.23668	6.23119	5.73823	3.61607	3.94502
3.65973	3.16164	3.40374	3.15631	3.31958	2.77202
5.46423	5.11188	4.25023	4.32577	7.84947	7.80309
3.80252	3.51497	4.86119	5.08383	7.20885	7.28454
2.76401	1.52315	6.26785	5.69683	1.25706	2.02159
5.33057	5.32149	4.5857	3.78796	7.61891	7.67974
3.57959	3.46525	6.06689	5.87414	4.56658	4.62726
2.3977	2.05563	7.87229	7.89767	2.02846	1.1847
4.2076	3.335	3.61786	2.98685	9.778	9.88826
4.89305	4.51266	3.08663	2.91396	6.26056	6.42052
5.19764	4.97122	2.41279	2.33622	5.1353	4.99335
4.50655	4.18707	4.91192	4.55644	5.72387	5.75763
4.9766	4.9855	3.20049	2.72295	5.81924	5.96962
2.99606	2.86228	7.16283	7.00318	4.91672	4.39489
2.98602	1.70616	6.78796	6.44852	5.85467	5.78983
2.86278	1.84072	4.55718	4.35483	1.85023	1.8923
4.4761	3.59925	7.50559	7.67333	2.86107	2.61363
5.10239	5.13594	5.54311	5.54937	3.4212	3.42932
2.35751	1.74535	3.69021	3.28957	3.37421	3.15868
4.4591	4.85889	6.401	6.27053	7.30364	7.31102
2.63205	2.46088	7.66204	7.72698	4.63273	4.59925
5.58906	5.33322	4.01029	4.05798	3.03515	3.14593
3.44429	2.82828	5.86347	5.57749	1.79546	1.55213
3.25623	2.53931	5.99471	5.98724	10.9645	11.0615
6.05159	5.82851	4.36666	3.76752	2.19963	2.35717
4.04218	3.45155	4.57855	4.75555	1.71512	1.46768
1.88548	1.9997	5.05072	4.97581	4.90249	4.74596
5.42243	5.40792	3.7763	3.73745	0.943751	0.269613
1.58223	0.779757	7.11759	7.31784	0.199628	0.0717725
1.86469	1.25591	4.32545	4.20087	6.69951	7.09509
6.38296	5.92517	4.33721	4.39616	6.32819	6.15765
7.53625	6.86179	4.38539	4.20973	4.23525	3.57345
5.34682	5.08933	8.16553	8.02486	7.04336	7.13384
7.1055	6.95851	5.70077	5.89066	4.62627	4.72931
3.23525	3.07801	7.02348	6.61697	5.38972	5.27979
1.24559	0.480308	5.55718	5.04153	4.98429	5.25902
2.87945	2.20608	6.41429	6.37369	2.1699	1.55486
5.81244	5.85883	5.40638	5.14502	3.86973	3.93812
1.32123	0.961941	4.4417	3.9692	5.19714	5.59037
1.967	1.57297	2.31511	2.35717	8.81522	8.99474
2.12941	1.27532	4.48785	3.62857	6.16139	5.95564
3.85033	3.64597	4.95073	3.50052	2.82679	3.10986
0.576633	0.133275	10.524	10.6309	8.81836	8.89982
5.95679	6.08905	4.85431	4.77563	1.99647	1.36046
5.78293	5.9774	6.15438	5.72983	1.62644	1.25347
3.58815	2.79547	7.23212	7.32559	4.67683	4.74805
4.61632	3.87188	6.11879	5.84339	2.08841	2.51952
4.87303	4.13873	9.04889	8.97563	4.02886	3.85013
3.20049	2.9294	1.93827	1.49491	6.6677	6.79848
6.44967	6.19948	10.7223	10.7966	0.396716	0.995178
2.81017	2.57213	12.2636	12.4165	11.3664	11.3291
2.38911	1.14229	7.56565	7.66297	4.38394	4.25733
3.59831	3.05968	6.01717	5.27275	5.37053	5.0625
1.97426	1.49124	8.60727	8.36801	2.72902	2.19222
3.73757	2.90995	3.56115	3.78192	3.60038	2.55931
2.1981	1.88653	5.23429	4.6107	8.19064	8.11905
2.86069	2.23265	3.28416	3.0632	7.26312	7.50819
5.31808	4.67089	5.67937	4.6376	7.31483	7.20172
5.37444	5.2133	6.90307	6.85668	3.10346	3.37686
0.694233	0.736302	4.28607	3.88211	8.29524	8.29182
3.73716	3.13982	6.40832	6.17621	2.54984	1.85984
5.41828	5.44104	2.88923	2.29808	5.84097	6.14485
4.99571	4.67884	2.94985	1.99192	6.75858	6.81002
2.1486	1.79835	7.18756	7.14646	3.80195	3.5494
4.14677	3.91839	6.06999	6.04905	3.22653	3.54614
4.06717	3.9179	6.22354	6.08775	3.06278	2.55384
6.05468	5.77117	4.59782	4.22485	6.7181	6.99396
4.25921	3.76226	3.78384	2.94471	6.94858	7.15507
4.41422	4.19326	3.54894	2.46448	2.61895	2.09712
1.72176	1.34879	6.39551	5.87467	4.97514	4.99961
6.61936	6.80769	9.59866	9.75778	8.09757	7.9484
4.95146	4.39597	4.64124	4.78828	6.47867	6.24921
6.12071	6.15845	3.9607	3.04671	6.58777	6.76459
6.04733	5.31237	6.28596	5.22888	11.477	11.3919
4.05055	3.96388	4.4308	5.74939	7.05808	7.24637
2.65921	2.03528	7.94292	7.96685	5.25168	5.33401
2.75413	2.74521	1.55718	1.55194	4.27948	4.29406
3.91878	3.5787	4.73242	3.79322	3.11953	2.88262
4.20236	3.09478	6.08459	6.25754	3.06973	3.02434
4.04261	3.89976	7.61174	7.74696	8.21512	8.26579
4.01741	3.66338	7.55323	7.38323	2.88341	2.70309
2.07875	0.623317	4.48621	3.99102	2.32964	1.78675
7.42356	7.35496	8.30964	8.34683	3.11807	3.24106
6.12618	6.14071	4.73406	4.46175	4.16973	3.65926
2.58554	1.8054	3.23198	3.00444	5.99775	5.74364
4.03155	3.60292	5.78984	5.84414	6.51206	6.24361
1.74601	0.788083	5.60863	5.60163	4.4617	4.75409
3.59129	3.43105	8.34808	8.35668	6.49372	6.61103
2.95232	2.29695	4.79669	4.61856	4.36931	4.33844
3.80032	3.75992	7.69025	7.77604	7.66536	7.77573
6.7087	6.69523	5.52019	5.0195	4.05616	4.10448
2.65211	1.74761	3.85052	3.5306	6.49392	6.49307
6.37594	6.20411	3.8319	3.31209	9.27175	9.41019
5.87296	6.01965	5.28362	5.53214	5.06377	4.75919
5.39981	5.06385	6.39433	5.83776	6.28957	6.48282
3.87658	3.10792	3.72307	3.17019	5.6755	5.3288
7.66473	7.60808	4.89359	3.99928	8.51807	8.78449
7.30894	7.08503	5.96403	6.17329	0.572287	6.01239
3.87768	3.03839	4.7727	4.22663	3.24708	3.30379
6.27874	6.16852	6.65987	6.56737	2.2703	1.25347
5.23829	5.01429	3.28933	2.44821	2.5011	2.77058
4.70798	4.63578	7.00497	6.958	1.45284	0.172985
2.04117	1.76131	5.05599	4.92118	1.25036	0.707466
6.59852	6.5195	4.26912	3.84477	7.61369	7.6963
4.45906	3.73135	4.78505	4.39322	5.93305	6.21816
4.86635	4.67007	3.92621	3.47077	6.2819	6.13133
3.10185	3.31385	2.97757	3.30915	6.46355	6.4367
3.55522	2.77417	5.13142	4.70731	5.62508	5.52799
5.02252	4.86487	6.39033	6.10867	2.65304	2.58819
1.94062	0.889118	2.7569	1.9667	7.27058	7.44635
2.77216	2.34116	5.46258	4.75166	3.87668	3.81817
2.59433	1.75376	7.13193	6.68954	6.31362	6.35569
1.29731	0.89881	2.32677	2.00154	5.23891	5.2156
5.41085	4.96371	4.91806	4.75731	2.93905	2.80278
5.64732	5.18421	7.76214	7.99339	6.11124	6.05336
3.76991	3.6078	3.76972	3.83142	1.57384	1.58616
3.83707	2.4817	5.39261	5.28934	9.51757	9.72026
3.21549	3.10002	3.7057	3.03157	5.50471	5.38485
3.01642	2.1547	8.5434	8.64798	2.20519	2.95353
3.1366	2.1105	4.69045	4.35655	2.94468	2.3645
6.40752	5.28258	5.4417	5.34175	6.72814	6.73421
7.51369	7.60889	4.18051	4.27732	0.379262	1.68437
2.90091	2.45293	5.87344	5.83371	4.13268	3.77231
3.67739	3.05161	4.43847	3.87436	8.45882	8.34983
4.65787	4.37396	3.5896	3.52064	0.822471	0.86454
3.73219	3.51313	4.51262	3.76717	6.2851	6.27732
3.58509	3.52913	4.95839	3.74147	2.02113	0.741269
3.45384	3.08563	7.1894	6.92844	5.22376	5.47372
5.65785	5.33622	6.01202	5.83741	1.47722	0.891263
3.4065	2.98417	2.98992	2.53242	6.01805	6.21299
4.42923	3.92649	1.22105	0.842791	7.16541	7.47372
2.80754	2.34711	4.8932	4.46905	2.46972	2.31015
1.97802	1.13691	5.03066	4.59925	7.73494	7.78325
4.75435	4.76447	4.38638	4.29645	10.7816	10.7042
4.60637	4.25208	6.62921	6.46519	5.34094	5.4313
2.24007	1.62318	5.76192	5.62962	6.03088	6.34088
5.95973	5.61574	5.54548	4.2812	3.82631	3.85966
5.55024	5.01429	6.68173	6.74533	3.88282	4.16133
1.53629	1.47883	6.95452	7.13894	2.21999	2.32218
5.16998	5.06797	5.83188	5.47816	5.10787	4.9573
5.3941	5.32045	6.05787	6.19441	4.40285	4.15369
7.58914	7.40158	6.73068	6.63469	5.55415	5.54689
0.909056	0.103128	5.26131	4.90181	2.82538	2.38202
5.0386	4.8391	8.23653	8.11212	0.167011	1.01644
3.59625	3.16714	8.62918	8.6814	3.54691	3.18762
3.12874	2.74951	4.21235	4.04352	2.28788	2.7068
6.2647	6.21074	7.78822	7.53868	3.83419	3.69104
5.11878	4.8204	4.29415	3.55155	4.11357	4.46598
1.4417	0.483772	6.42036	6.44725	1.28608	1.43506
4.69391	3.51307	8.30134	8.44725	4.58904	4.96698
2.98157	2.4218	4.47635	3.41188	5.99932	6.34415
4.29792	3.81171	6.48887	6.3495	6.57614	6.53685
2.54521	2.21644	4.2644	3.40239	1.81175	1.93628
1.41541	1.51888	5.10652	4.96217	6.70402	6.97379
3.99635	3.64284	6.9495	7.13134	1.37131	0.627508
3.0733	2.78801	5.79819	5.97026	2.84669	2.96538
3.22301	2.29781	4.49908	4.25821	3.91517	3.99774
8.89632	8.99736	6.18881	5.37324	4.4515	4.51647
1.10457	0.758569	4.71501	4.59925	5.34823	5.23204
6.82578	6.68779	5.31391	5.26483	5.37997	5.49888
2.84051	1.31868	6.66277	6.40275	4.82926	4.66574
3.93002	3.84836	4.90803	4.64713	0.0599937	1.42399
3.74828	3.32003	5.32595	5.02853	6.10167	6.09999
1.66102	1.70309	3.77228	3.33282	8.65949	8.79472
4.62228	4.37562	5.21098	4.95123	1.85091	1.10448
4.46096	3.71544	3.79333	3.33706	2.14009	1.72273
2.87093	1.83208	3.94837	4.19207	4.47752	4.12333
1.51049	0.304629	3.6695	3.42019	4.31002	4.04466
5.75926	5.99958	4.50101	3.55061	2.61376	1.27732
2.91659	2.33927	4.85333	4.7708	4.9132	4.91996
3.5921	3.11959	5.38619	5.22328	4.60965	4.2136
5.42701	4.39931	3.47626	2.81789	7.68195	7.79189
7.17189	7.16241	3.81299	3.14203	1.72429	1.12893
3.66194	2.62197	5.76283	5.73322	4.60211	4.2694
11.1849	11.2373	6.05949	6.0922	7.97222	8.05297
6.28034	6.36792	4.25539	4.00265	4.11785	3.84581
1.49985	0.239354	5.77324	5.90396	4.09034	4.18585
3.30925	3.64998	5.23374	5.07342	1.97222	1.70113
2.38613	1.81761	5.38229	4.88348	5.47875	5.40333
3.62131	3.49032	5.88899	4.39495	6.69827	6.93299
4.36245	4.15972	5.22143	5.05646	3.21127	2.68839
5.45284	5.01668	2.92839	2.27437	9.53107	9.60473
6.88202	6.94717	1.93269	1.15533	2.96682	2.87301
4.26576	3.26731	4.47871	4.29838	4.24524	4.03136
5.7083	5.62121	1.48134	0.479012	7.22882	7.41392
0.824574	0.709102	6.59661	6.40809	8.74848	8.86184
4.53554	3.85772	6.06386	6.0412	5.67502	5.75738
2.82832	2.36996	2.41632	2.26045	2.38726	1.47823
4.59663	4.67417	5.20395	4.95858	3.26345	2.35132
5.67707	5.55116	6.27419	6.28508	4.94622	4.93485
3.77457	2.94789	5.50565	4.89564	4.87478	4.71496
2.94516	2.64541	6.46669	5.8844	0.923855	1.09145
3.71064	2.76316	4.91672	4.57177	3.85147	4.22914
4.77291	4.43947	3.51454	3.7201	3.82992	3.91532
3.8799	3.13982	6.67326	6.5273	4.06103	3.81837
2.54814	1.15996	3.83946	3.31385	5.54206	4.79908
2.88504	2.67279	4.39763	4.22247	4.40561	4.02976
1.85159	0.374283	5.20163	4.05793	7.59441	7.39714
4.69198	4.47507	4.82449	3.60217	4.46852	4.33812
8.75387	8.77624	7.69066	7.50967	8.92989	8.97165
2.27776	1.84136	5.92723	5.57371	9.4387	9.47897
2.20845	1.89438	3.20021	2.32276	4.20025	3.40942
1.74166	0.642177	5.2135	4.61	7.72827	7.79008
1.10463	0.47532	4.26056	3.98852	4.97364	5.00288
6.21351	5.93226	5.61528	5.11448	2.40337	2.35618
7.93939	7.99614	5.29138	4.88965	4.66835	4.67549
1.2222	0.974759	3.29672	2.64988	1.9953	1.64505
1.18884	0.739925	2.55718	2.14755	7.06074	7.17125
4.63732	4.55011	5.60825	5.40846	1.54436	0.364033
3.4505	2.79966	5.60103	5.62572	9.92552	10.098
4.37149	4.56397	5.17016	4.69734	9.94732	10.0824
3.50655	3.08704	4.71716	4.16503	5.14952	5.04449
5.80314	5.11831	3.69836	3.2501	2.13933	2.03938
5.34385	5.11481	4.83991	5.05462	8.35976	8.40899
3.73518	3.13982	4.61826	3.92585	2.9761	2.70783
5.39977	5.18421	2.67204	1.74326	2.83528	2.36545
5.81699	5.45134	5.15738	4.64002	2.45851	2.05628
5.19982	5.31784	3.18903	2.99466	2.09775	1.77058
3.40644	2.58019	4.24732	3.83371	4.26136	4.18961
0.763866	0.17122	1.72752	1.82111	5.04664	4.70293
4.5341	4.68086	3.84695	2.94924	6.87351	6.73464
6.65948	6.48166	4.41541	4.04244	3.23525	3.72983
2.97931	2.32623	3.98834	3.3903	5.67332	5.65849
3.8747	3.51179	4.19665	3.75695	2.39279	1.27732
2.70338	2.15497	4.65906	4.02411	3.73561	3.96496
5.61757	5.30961	6.43405	6.13663	4.86962	4.72379
4.1075	4.01673	4.46972	4.49161	5.30246	5.07751
3.39244	3.28766	4.17867	4.47106	4.67369	3.85778
1.22465	0.358348	5.03172	4.66747	2.91828	2.00099
5.87788	5.87755	5.59443	4.61943	2.82021	2.86228
2.05022	1.01429	5.17777	4.52525	7.35555	7.75985
3.99375	3.8027	5.77795	4.84578	2.92491	2.60658
1.16222	1.31121	5.44333	5.28123	3.1637	3.23002
4.08353	3.75279	4.32891	4.05477	3.99662	3.87555
3.44096	3.03204	5.88416	5.85382	3.57012	3.78211
2.91397	2.36295	4.58519	4.03116	3.96143	3.83126
1.54901	0.301569	6.70497	6.28652	8.87911	9.06284
2.93325	2.49129	4.05711	4.15311	4.04507	3.55844
1.21974	0.959246	6.02741	5.19047	7.94137	7.9694
4.13481	3.97321	3.04787	2.33596	9.20327	9.3873
4.55718	4.41171	5.59153	5.20149	9.17053	9.36478
2.6407	2.60877	2.72679	2.40047	7.75881	7.78877
4.71978	4.63937	8.13467	8.41774	2.32881	1.37088
2.98405	2.49325	5.02102	4.56289	6.06708	6.1222
0.966132	0.48464	4.17221	3.10892	4.89008	4.785
1.89738	1.81392	2.82279	2.58107	8.64195	8.59925
4.47691	3.16576	6.35988	6.20218	10.7221	10.8907
5.36068	4.73252	3.92354	3.96561	7.01382	7.11505
2.32836	2.12532	6.59928	6.52508	4.2982	4.18647
7.03053	6.91384	6.68113	6.31748	5.82516	5.89658
1.14116	0.981598	5.49688	5.44818	5.91882	5.95653
4.21141	3.63341	5.82021	5.57598	3.72447	3.48869
6.53234	5.84692	4.42867	3.63966	2.88709	2.37775
1.91332	0.665887	4.6042	4.06814	4.55576	3.95061
4.40552	3.93399	4.35028	3.89881	5.37734	5.43782
6.92344	6.78163	5.42055	5.41403	1.00903	0.531726
6.77342	7.00582	3.22567	2.97555	4.90232	4.73951
1.79436	1.23603	3.35977	3.60829	2.97222	2.77172
2.94879	2.65924	7.04522	6.91628	3.789	3.44578
2.54436	1.00146	4.96677	4.96853	5.38643	5.07147
4.53672	4.63537	4.13604	3.58087	4.54841	4.47451
4.19284	3.51642	7.88223	7.89596	5.83346	5.63047
0.145367	0.187436	3.6731	3.30013	8.36899	8.35666
5.91228	5.51029	9.40501	9.52787	0.697038	0.463473
3.51685	2.74036	5.96639	5.87387	3.41115	3.29423
3.46156	2.75194	5.34015	5.5375	5.01691	5.3903
5.59465	5.58014	5.32779	4.91166	7.42577	7.41776
4.89224	4.22479	5.30482	4.92979	3.29184	3.15703
3.29472	2.96727	5.68136	5.41353	2.51788	1.49124
2.06332	2.17148	3.12613	3.78711	3.83421	3.42932
2.56934	1.75478	9.27375	9.45263	0.253399	1.10282
3.0202	2.47055	3.54088	3.75578	2.32891	1.82666
4.34743	4.34476	3.81805	3.63772	1.75967	1.80174
3.79681	3.51526	7.55431	7.72526	9.80776	9.94569
2.25137	2.58295	6.76568	6.41162	5.38812	5.28251
4.66821	4.44725	5.38412	5.32867	3.94163	3.74923
3.62237	3.20734	4.51971	4.58063	0.0128597	0.054929
1.30681	0.301569	1.2055	1.91054	1.15184	1.32515
3.78415	3.25035	4.8074	4.61108	8.18911	8.30945
2.98083	2.65295	4.57415	4.39804	1.21676	1.30463
2.75175	2.13982	3.6616	3.3522	1.95116	1.81265
4.10617	3.8923	5.65607	5.83688	0.737001	1.101
6.26932	6.35225	6.01273	5.86532	0.813019	0.2336
4.599	4.14114	4.25779	3.93195	7.52941	7.41009
2.56257	1.82396	4.12361	3.98952	4.49888	4.09079
1.46526	0.844362	9.14741	9.08941	3.90318	3.20356
5.01478	4.52519	5.48679	5.52886	6.68315	6.99707
7.18715	7.22099	2.92969	2.14579	8.12857	8.38232
4.38797	3.18611	4.99113	4.59544	8.41968	8.50681
2.08009	0.573953	3.8926	3.58953	1.90921	1.14392
1.6874	1.62256	4.84646	4.62673	0.927824	0.554855
4.41102	3.92533	4.06325	3.51776	2.7416	2.72478
7.1879	7.06663	2.93064	2.2691	4.17819	3.86387
2.97222	2.97287	5.09687	4.83863	2.82021	2.77982
3.21404	3.22914	5.92742	6.10236	3.8989	3.75903
2.44497	2.79189	2.09307	1.55018	6.60665	6.69968
3.70523	3.57935	5.2324	4.69727	6.63518	6.79856
1.85023	2.26427	6.72027	6.7364	1.80586	2.11096
2.52216	2.13681	4.56535	3.93423	5.13229	4.71246
4.30792	4.14646	3.92641	3.98007	3.91651	3.49345
7.95437	7.70606	4.46075	3.87055	2.3584	1.94104
3.15508	3.01429	4.96876	4.90312	8.7579	8.88285
3.18795	2.88791	7.83655	7.92018	6.46698	6.70053
2.99682	2.66733	4.24115	4.04355	7.44718	7.87464
5.49768	5.6281	4.57348	3.92118	5.68329	5.46867
1.97453	1.96002	3.69744	2.85368	1.51279	1.73928
0.230555	0.14138	3.10014	3.1422	4.53252	4.44996
3.73406	3.10122	3.21909	3.30123	0.469717	1.68171
2.86504	2.16146	5.19756	5.04698	9.2283	9.31751
7.42976	7.3902	2.19133	1.53089	10.9765	11.1939
6.97923	7.11819	5.8995	5.53934	2.29706	2.21782
1.07965	0.0392539	3.29415	2.10175	7.49595	7.22452
7.01602	6.93026	4.59004	4.14148	5.2525	5.0572
2.97537	2.33811	5.73685	6.00661	4.6969	5.61142
5.42712	5.30198	4.64835	4.61181	2.95384	2.99591
5.53161	5.11499	4.69998	3.94598	11.7959	12.0029
6.0497	6.18089	2.73222	1.55565	4.73343	4.4232
4.86032	3.85989	3.84007	3.18946	3.3584	3.28681
4.18618	3.72321	5.53428	5.76031	3.97809	3.97852
4.6992	4.41683	3.71059	3.29481	1.46972	2.68171
5.68963	5.59694	3.45516	3.11498	1.61858	1.66065
5.25254	5.33475	4.49867	3.26812	9.04809	9.21655
1.36736	0.30251	3.89086	2.95405	5.28799	5.28625
3.72035	2.53236	5.18945	4.84211	5.47472	5.19486
4.91332	4.08925	5.68381	5.54531	4.26824	3.71275
0.591066	0.088815	6.57824	6.44842	7.81173	7.73775
3.23071	2.32199	6.10497	5.67817	10.6372	10.6336
4.35816	3.96907	7.57334	7.61541	7.20195	7.35329
2.37543	2.12204	4.3803	4.18421	5.45366	5.62686
2.81873	2.09675	5.38011	5.48997	8.18908	8.33105
3.80979	3.00087	5.12086	4.90393	6.27832	6.44238
0.886777	0.443419	5.04967	4.44231	6.12694	6.42079
3.95669	4.01737	5.15851	4.9332	9.03936	7.84347
4.94495	4.23213	5.03485	5.38749	9.6498	9.71989
4.48208	3.98258	2.43824	1.28766	6.963	6.81638
2.99612	2.84264	5.74876	5.72975	4.50147	3.98112
7.21837	6.81535	7.01754	6.93137	8.95454	9.06253
3.20384	2.33297	4.11861	4.52008	6.06619	6.19893
3.78534	3.49199	5.18252	4.81163	2.35555	1.51626
1.96075	1.40243	6.0365	5.90546	2.02546	1.35132
2.965	2.19972	6.90489	6.12831	9.69325	9.83756
2.69016	1.62148	5.47145	5.02121	1.41082	0.774821
0.900462	0.400004	5.52283	5.52078	1.92782	3.5846
1.89521	1.21292	5.91893	5.83573	2.54436	3.13662
3.80283	3.53747	6.41223	6.28837	7.84684	7.84753
1.22603	0.567663	3.50433	3.28766	4.07771	4.2007
4.32937	4.05425	7.274	7.21202	1.17142	0.521612
3.705	3.49073	4.79457	4.55155	5.26469	5.23942
5.22913	5.05646	5.90291	5.49512	8.99902	9.09253
2.06757	1.54135	4.33479	4.30917	6.69873	6.7807
3.02825	2.33336	6.4355	6.17712	1.41582	0.692359
3.06242	3.12618	7.60099	7.75629	5.23525	5.38585
2.37854	2.03157	6.71484	6.6515	6.29994	6.01912
2.11872	1.43144	5.22838	5.22035	3.98039	3.30974
1.94247	1.00714	4.84639	4.72019	7.16066	7.07184
6.78046	6.64374	2.18592	1.28939	4.32369	3.81927
4.52283	4.55618	4.7683	4.48844	4.43092	4.28536
3.97864	3.71473	9.69394	9.63738	5.92736	5.80897
4.22118	4.08267	6.93685	6.8255	4.18691	4.51849
3.30479	2.96676	5.4598	5.41893	1.44676	1.78428
4.81571	4.54428	8.04863	8.15679	3.95248	3.63028
3.46972	2.61513	11.3896	11.5526	4.82264	4.82164
1.91416	1.20526	6.51765	6.76994	5.34555	5.18035
3.86047	3.57819	4.94612	4.70194	6.55904	6.69306
4.60917	4.47492	4.94491	4.63487	6.55832	6.49943
2.30925	2.41545	6.60717	6.91376	6.48853	6.43157
4.54755	4.24987	5.63861	5.28313	5.60714	4.71796
4.7205	4.47012	5.62285	5.32343	4.38441	4.46855
4.30844	4.07813	4.15064	4.03963	7.18795	7.19323
2.25488	1.61106	7.71843	7.89581	2.30342	1.85451
2.45968	1.90451	4.99499	4.95744	6.6623	6.83595
4.45404	3.93938	6.7314	6.59371	5.49543	5.3962
3.10368	2.48434	6.4703	6.34927	1.7883	1.2263
3.21073	2.48107	5.8237	5.06058	11.3001	11.3722
2.7755	1.72564	5.62007	4.65528	3.65192	3.25429
6.15863	6.20479	4.71283	4.49187	5.09251	5.00642
5.22517	4.59733	4.27211	3.76769	4.52752	4.37266
5.46656	5.02081	6.20926	6.42416	6.73227	6.76745
3.61914	3.12643	5.38591	4.73283	6.02825	6.20782
3.79777	3.78375	5.84949	5.95322	6.24832	6.21118
3.76329	3.19789	6.37913	6.31991	3.29159	3.70981
6.04318	5.58299	3.32329	3.01429	3.34388	3.38594
3.39292	2.9798	7.96355	8.02229	3.17531	3.45839
2.96734	2.16872	2.28416	2.02138	3.51186	2.85732
2.82254	1.94751	7.09971	7.15541	4.55246	4.29606
4.87911	4.09401	2.59322	1.77968	6.32917	6.4066
3.58633	3.28832	5.0419	4.51302	3.72279	4.01798
3.58004	2.16196	4.90965	4.63242	5.33523	5.39895
2.14053	1.26277	4.31845	3.49533	6.85708	7.08624
4.9389	4.62473	1.13092	1.98034	4.10363	3.79386
5.14338	5.09846	5.97382	4.90121	2.5896	1.66338
3.4413	3.36169	5.49305	5.20497	2.62598	2.12491
4.51128	3.81949	9.30348	9.19348	3.46686	3.78808
2.66546	1.55866	7.43824	7.51648	7.05657	7.00196
3.28481	3.08246	8.08581	7.51276	4.77757	5.16068
2.85382	2.55486	5.30671	5.35947	2.72148	2.68109
2.43337	1.90776	6.47385	6.35086	4.74818	4.70098
5.10087	4.18421	6.56086	6.39817	6.90422	6.97157
1.76517	1.44467	2.29415	1.82164	3.02546	2.45086
3.20321	2.86831	5.77086	5.38247	1.9267	1.26833
2.27647	1.59506	4.71121	4.67832	2.51487	2.74958
3.31641	2.44231	3.36852	2.32313	4.54691	4.16014
3.21323	3.46175	4.63504	4.67711	2.55718	3.01429
3.49109	3.09794	3.8252	3.00929	3.60266	3.4421
2.95285	2.82986	5.10062	5.06703	1.70632	2.64148
2.95136	2.39439	1.42515	1.26077	2.88162	3.22949
9.59593	9.76917	4.55718	4.39714	2.00538	2.83595
4.50662	3.56746	4.53265	3.58986	8.82587	9.03376
4.33936	3.54525	3.55548	2.78849	3.01831	3.06038
4.78825	4.57879	5.44234	4.9932	1.29979	1.66379
4.49183	4.14904	5.19648	4.59048	5.47038	4.74914
5.60241	5.90454	5.47918	5.63672	6.26699	6.43771
5.67383	5.21922	4.35455	3.9429	3.20839	3.03129
6.88844	6.74735	6.30014	6.16629	2.5685	0.610565
4.54473	4.28145	2.03635	0.554855	5.47857	6.10175
2.02769	0.454098	3.33618	2.59506	8.04261	8.03221
1.65166	1.51865	7.67781	7.62626	3.2897	3.38424
5.24381	5.29439	4.78545	4.26138	7.71864	7.76495
6.91312	6.47595	4.32494	3.25043	2.72711	2.59925
4.00433	3.73633	6.90685	6.87853	2.84446	3.30157
3.92649	3.14543	5.0438	4.01009	6.4579	6.64472
8.56879	8.70359	7.18244	7.33055	6.58728	6.34315
1.32312	1.6062	5.98	5.81606	2.03362	2.07569
6.63435	6.07825	6.39912	6.61952	1.35424	0.618702
2.20388	1.35432	3.5324	3.22004	5.58872	5.5382
5.34533	5.26341	6.3277	6.25662	8.41937	8.61948
2.71588	1.85579	4.16961	3.21995	3.01445	3.13744
2.01347	1.58278	4.76628	4.50349	0.228057	0.755553
4.59982	4.43113	5.28085	4.63197	4.27478	4.19486
5.53815	5.37686	5.36525	5.05368	9.74098	9.95036
2.12319	2.41902	4.00041	3.74364	2.10787	0.449502
5.49964	5.00616	6.26838	6.29477	2.54901	2.21911
5.85674	5.74681	3.98613	3.4082	7.06141	7.14945
2.58243	1.28195	8.57626	8.47449	7.82529	7.79528
3.95573	4.04671	4.34617	3.62702	4.30754	4.1028
2.64436	2.25347	4.75979	3.78437	3.64157	3.65047
2.49241	1.77775	5.54471	5.3151	4.88295	4.96538
4.35597	3.99279	6.83371	5.53901	7.50319	7.81616
4.6324	4.41759	6.03871	6.04125	2.82679	2.61888
2.74027	1.92086	4.63266	3.91896	2.615	2.45062
4.87842	4.53262	4.4401	3.5087	5.93009	5.75643
2.67803	1.85135	5.77189	5.59642	1.70918	1.16629
3.12563	2.44333	3.55718	3.14674	4.56832	4.36938
3.5782	3.24056	4.15433	4.1964	0.333179	0.96021
3.97222	3.03035	4.91359	4.01429	3.33479	3.65439
2.86461	1.96382	4.82237	4.85363	1.41235	1.24029
1.71483	1.21633	5.75175	5.88525	4.75559	4.79766
5.72101	5.68349	3.92641	3.95289	4.68303	4.6163
4.97624	4.639	5.51186	5.02908	3.29845	2.89071
3.3087	3.26396	6.76928	6.89083	6.32147	6.3883
6.22326	5.5483	3.25601	2.57819	3.17016	2.41868
3.37498	3.03853	6.75063	6.65322	0.245122	0.5282
3.95224	3.56917	2.98493	2.44204	2.79975	1.77143
4.50133	4.03843	4.44455	4.02565	4.20124	4.4975
4.09185	3.67936	3.72711	3.23668	0.953839	0.617397
4.42931	4.13619	6.48679	6.34794	4.13548	3.74459
4.94686	4.5807	7.37598	7.41501	3.51279	3.69781
5.24015	5.05779	5.86096	6.04219	0.784591	1.11617
2.57112	2.11786	5.97136	5.72392	2.76959	1.87877
3.62933	3.69755	6.27401	6.38191
1.91679	1.04292	7.15855	6.96025
5.51411	5.56213	3.12815	2.84498
4.26014	3.71962	4.35455	4.2267
3.60298	3.19221	4.87326	4.85687
6.06118	5.91462	5.34295	5.26303
3.24248	2.57733	2.78153	2.1074
5.2336	4.97421	4.15742	2.56699
3.63735	2.97776	4.34917	3.82618
5.64654	5.62211	1.44344	2.18595
4.21737	3.79189	3.82252	3.2342
5.41532	4.99004	3.03164	2.02741
4.24986	3.69655	5.75082	5.59126
3.1569	2.02063	4.88932	3.90794
4.52743	4.24193	7.44387	7.28957
8.06794	8.22222	7.90852	7.80424
3.57736	3.4037	9.19501	9.25972
4.58438	4.22243	6.80919	6.74595
5.14672	5.09446	5.19728	4.70402
7.79182	7.60462	4.20737	3.95798
2.95669	2.22382	7.75144	7.88115
4.4417	4.18421	7.68358	7.78401
4.33933	3.95573	6.86133	6.97889
5.5726	4.56521	5.07771	5.36185
3.9517	3.85796	4.26688	3.74127
2.21449	2.37686	2.61737	1.36175
3.85056	3.75439	3.38586	3.19715
3.98075	4.53804	5.6038	5.593
6.30622	6.23581	4.36788	4.10509
7.03078	7.14522	5.88998	5.83605
6.22326	6.20276	3.45409	3.59925
6.10641	6.15749	3.23861	2.52684
3.07011	2.46448	4.24168	4.13767
5.78956	5.74735	4.82136	4.4918
1.67275	0.749584	5.73889	5.58465
4.92878	4.44453	4.4085	3.97083
4.72826	4.60443	0.518261	1.14529
6.25379	6.3433	4.74427	3.92266
4.42288	4.20543	3.96049	2.96074
0.512786	0.32039	3.44567	3.19346
2.92915	2.79719	1.15406	0.755553
5.26619	5.04066	4.20451	3.86807
3.28572	3.05571	2.33673	1.82081
5.92907	5.72954	3.54961	2.77671
5.30089	4.76583	6.81304	6.25787
2.95024	2.23623	4.60185	4.53429
2.90235	2.32039	3.17276	2.52646
6.25944	6.1073	5.95311	5.78531
3.08033	2.34396	4.08863	4.18017
2.10334	1.17578	8.35073	7.34406
7.15178	6.67768	3.37625	2.06873
4.46578	4.03696	0.653729	0.695798
7.13237	7.04611	5.68136	5.35873
5.09847	4.63163	3.46623	3.20112
0.434784	0.213818	5.24007	4.5847
3.81894	3.39838	4.71918	4.41672
1.60138	0.872931	1.49726	0.0538989
5.25127	5.12949	4.77017	4.20591
3.02113	2.37354	5.03717	4.69562
4.37432	3.85079	3.08373	2.20693
3.99494	3.62197	3.77383	2.51594
3.71541	3.46571	5.61459	5.20462
3.68015	3.48569	4.57647	4.07988
1.98771	1.65127	6.19694	6.02447
4.49559	4.03778	5.60488	5.45932
6.38726	6.18489	6.85291	5.92862
5.52877	5.45126	3.95452	3.48963
2.51996	2.54885	3.22768	2.95256
4.20243	3.88376	5.14742	4.75679
3.90824	3.61104	2.83086	2.57206
6.23433	5.91712	5.67864	5.41216
5.71135	6.04381	5.32244	5.45389
1.70492	1.06418	3.52508	2.28084
2.07272	0.977284	4.34026	4.26286
5.04751	4.69236	4.55893	3.94792
3.31542	2.90293	2.84474	2.09381
1.15488	1.10384	3.76418	3.5743
5.31039	5.24637	6.63989	6.60818
0.253399	0.780896	5.14581	5.13568
0.632368	0.481792	2.5019	2.12893
5.05148	5.18581	5.67931	5.66404
2.37396	2.0941	3.87437	3.87797
3.36641	2.66535	4.44233	4.317
3.07019	2.8923	2.72907	2.30647
3.19461	3.36792	4.66494	4.66824
4.65465	4.65255	4.89207	4.47175
1.41527	1.18316	7.4377	7.42331
0.970991	0.442745	5.21262	5.19998
2.43929	2.1542	5.90355	5.70409
0.967417	0.453093	4.82084	4.18358
4.98419	4.61519	3.25233	2.1212
2.52027	1.84864	4.89063	4.75312
6.13707	5.8186	6.87616	6.83003
6.60501	6.49856	4.83729	4.08014
4.67639	4.34591	7.00079	7.05793
4.84148	4.51089	3.05468	2.86934
5.72265	5.74221	2.3251	2.42061
5.36497	4.98502	10.3053	10.3626
2.1992	0.910628	10.8393	10.9866
4.42741	4.7183	3.18214	2.92465
7.22567	7.1912	2.97694	1.39098
3.89938	2.61251	4.67931	4.74921
0.615283	1.16431	5.50331	5.59168
4.38133	4.06083	4.37985	3.92442
0.909482	0.799548	7.19006	7.01825
4.3633	3.8449	5.36713	4.39762
3.25233	3.26004	6.06478	6.01863
6.46461	6.05214	5.30032	5.11877
7.76257	7.79076	5.46938	5.4771
2.85555	2.11335	5.05998	4.7538
1.80074	0.856746	5.37344	4.69829
4.09193	3.83197	7.69492	7.68149
8.13052	8.04246	3.046	2.2621
4.21809	3.95204	6.36236	6.29149
5.9639	5.7808	4.96548	4.81674
4.15938	4.26495	9.03291	9.21841
4.93994	4.64532	4.46285	4.73841
4.96849	4.85732	3.19001	2.58849
3.08795	2.33165	3.96345	3.29182
6.06189	5.88387	4.62327	4.52999
4.06619	3.85301	5.05511	3.93456
6.86591	6.82675	6.41291	6.24815
1.09477	1.16926	7.72214	7.78887
2.84446	2.52396	3.96	3.45345
8.10524	8.07056	6.06392	6.08896
6.96273	6.68945	6.68722	5.84698
1.77428	1.53624	5.98602	5.8799
6.96422	6.58236	7.20362	7.06454
1.37727	0.156306	4.51905	4.39762
4.08325	3.66589	3.33928	3.22702
4.33737	4.2219	4.97426	5.10235
2.76462	1.99934	5.14916	4.92215
3.76323	2.97176	3.96499	2.98958
2.99077	2.32712	3.23061	3.17646
6.17902	6.0625	6.02925	6.10038
1.34596	0.928593	3.09528	2.94858
4.19505	3.83249	2.69704	2.16974
5.11412	4.67654	3.32865	2.85922
2.15863	1.74127	5.14086	4.90025
1.95854	1.57177	5.79629	5.49423
2.35002	0.889591	4.49514	4.31809
5.92729	5.8937	5.21359	4.82845
8.47229	8.67127	5.63952	5.6037
6.76014	6.5369	6.7276	6.8261
5.66599	5.6256	3.87426	3.7004
5.9603	5.93478	6.09273	6.16957
4.65999	4.59103	8.66258	8.74798
4.88422	4.72193	3.91899	3.40994
3.84479	3.49759	6.20737	6.06682
5.05858	4.84026	5.43139	5.17173
5.76336	5.29036	5.22597	5.1212
1.13397	1.55791	2.78635	1.89881
4.41535	4.2528	8.31391	8.12497
4.24703	3.72162	6.6415	6.79856
2.34238	1.57001	4.81396	4.57087
5.53584	4.25988	6.36238	6.41476
6.75024	6.44967	4.83471	4.50239
2.9575	3.12694	5.55306	4.9641
2.25991	2.27732	3.21684	2.79451
4.1101	3.33539	3.68353	3.05289
4.16695	3.85112	4.51661	3.85309
1.77746	0.989455	6.1986	6.43534
6.6041	5.991	4.89732	4.66235
4.86586	4.29461	5.97601	5.45326
3.79422	2.96182	4.11023	3.79189
3.24112	1.97402	2.82021	2.19486
2.83471	1.86298	5.87593	5.72808
3.93677	4.08267	2.91146	1.90623
5.30531	5.10257	4.00259	3.70287
2.5604	2.36497	6.77823	6.45658
4.27552	3.72433	1.57643	0.57411
3.5685	2.69803	4.81419	4.54785
0.363872	0.125834	7.72906	7.85088
5.13119	4.83066	2.98026	2.11543
2.48458	1.60807	3.47152	3.02509
4.90157	4.21834	5.0599	4.7531
5.94936	5.26236	4.28836	4.03221
2.26401	1.71636	2.82091	2.56342
5.87811	5.896	4.60965	4.03419
5.2703	4.95391	4.13449	4.32241
2.93864	2.01173	3.6858	3.65833
1.43359	1.3456	7.29415	7.24631
3.18945	2.71028	3.84208	2.81886
5.46369	5.25235	1.90948	2.29259
3.07786	2.59414	5.03209	4.51658
5.68038	5.12718	3.72936	3.30748
7.38118	7.21441	4.27243	3.06215
4.79672	4.82798	4.53372	3.39994
5.69364	5.75125	5.03943	5.04937
1.16327	0.188461	4.198	3.82706
5.45908	5.49807	1.87536	0.917425
5.33292	5.33509	5.57623	5.35106
6.09919	5.95539	4.51765	4.60358
3.16008	2.79825	5.03541	4.59205
3.59251	3.71013	8.01557	8.11033
4.00772	3.46482	4.35421	4.05115
5.32398	5.13604	2.01286	1.24757
1.94515	1.28267	6.10307	6.12998
3.19845	3.16252	4.48546	3.69278
3.57948	3.29519	2.17537	1.1794
2.44301	1.66065	5.88076	5.86228
4.45646	3.28008	9.778	9.88826
6.40308	6.54153	3.83174	3.6623
5.09499	4.22184	4.8554	4.40508
3.4386	3.65172	3.04751	3.13767
3.65672	3.32795	10.0598	10.1722
4.36955	4.04905	3.09121	3.0208
2.1101	0.924756	6.41072	6.5335
2.78498	2.10061	5.44676	5.1814
3.86281	4.01591	1.31315	0.654781
4.54793	4.11659	3.46852	2.58966
5.12148	4.85543	6.26915	6.35381
7.65401	7.48597	4.04261	3.33622
7.04892	6.53763	4.51296	3.77822
7.96614	8.23386	3.53146	3.44328
3.93297	3.33183	5.82332	5.69837
4.04368	2.89179	3.33479	3.25656
1.57692	1.18289	7.42446	7.42897
3.66547	3.58309	8.21266	8.26498
5.63093	5.22728	3.02756	2.30526
3.51279	2.55486	3.29159	3.101
1.27178	1.1212	4.41034	3.93573
6.22344	6.16478	4.91672	4.39489
6.81711	6.72411	0.999185	1.19326
4.7463	4.53683	5.39137	4.733
2.76376	2.08267	3.42736	2.48805
4.1469	3.74839	7.5438	7.5349
2.70054	1.85509	3.99208	2.90256
3.8901	3.48064	4.01621	3.69849
6.30901	6.05681	4.52588	4.46298
3.82488	3.41525	7.79678	7.79401
5.40973	5.4028	6.86197	6.71663
5.93203	5.91376	5.71712	5.65456
5.13962	4.08791	4.91828	4.99094
2.55923	1.69646	6.51644	6.26556
4.9139	4.37583	7.11434	6.70639
3.09823	2.46327	7.00433	6.30266
5.85307	5.98167	4.16669	3.21171
2.8088	2.41318	2.86107	2.61363
5.82803	5.31727	6.00319	6.01497
2.06533	1.61836	5.92802	5.86021
4.77318	4.82377	5.35802	4.84565
5.34806	4.81135	3.49406	2.67483
2.04852	1.7355	7.30364	7.31102
6.64488	6.56056	4.70104	3.90709
5.60466	5.69521	4.07336	3.40084
4.31568	3.74107	5.3594	5.11161
1.43134	0.888443	4.76169	4.54806
2.02634	1.81207	2.89495	2.40027
0.389483	0.119609	5.85393	6.04638
5.03466	4.86228	4.54834	4.30353
0.653856	0.150491	3.26522	2.86961
4.59894	4.37015	5.33417	4.69119
3.76176	3.23268	3.95285	3.52694
6.89499	7.05432	4.58734	3.9652
4.64594	4.12075	4.89508	4.74918
6.33944	5.81641	6.32271	6.16662
2.33359	1.73947	5.98294	5.96779
5.83654	6.1151	3.71696	2.94779
5.03635	4.64232	7.38587	7.65991
3.04261	2.78512	2.09092	1.5729
7.45072	7.3003	8.33897	8.37068
5.2518	4.86767	3.16404	2.71371
4.7054	4.19765	4.73382	4.61732
2.71876	1.90456	6.02546	5.63848
5.06773	3.31893	4.15801	3.71945
3.61213	2.76853	7.02406	6.92586
3.8368	3.23071	5.32858	5.19276
1.68591	1.32463	5.74983	5.71566
4.44359	3.35195	4.62627	4.72931
5.79468	5.76749	5.38972	5.27979
4.39099	4.12573	4.98429	5.25902
4.8961	4.37098	4.62711	3.70561
2.19357	1.0781	6.40321	6.47452
1.3543	1.2139	4.67923	3.95279
5.64677	5.07719	4.42902	4.60645
5.72499	5.74424	3.00171	1.29723
3.86644	2.93814	11.3664	11.3291
2.98493	2.17139	6.16312	5.1822
3.94713	3.48543	6.81362	6.5625
4.14162	3.49726	4.89034	4.52088
4.01572	3.70336	6.12203	5.95669
5.82538	5.83488	5.37053	5.0625
0.629196	0.374283	5.56956	5.83085
2.44693	2.47193	7.26312	7.50819
1.32014	1.55486	8.29524	8.29182
3.6039	2.76284	6.49639	6.70391
8.85374	9.06018	5.10652	5.11617
5.78372	5.15481	0.848835	2.17101
0.351631	0.241698	7.0967	7.27889
2.29567	1.28827	5.40827	5.31853
5.7751	5.95853	6.49175	6.7872
6.7179	6.44833	5.69526	5.08197
6.37432	6.25133	4.97514	4.99961
1.88823	1.58927	6.27281	5.96549
6.8576	6.41953	2.88952	2.1558
3.61467	3.38466	2.62054	1.98454
8.58327	8.68981	6.45742	6.1759
5.11661	5.26948	6.31707	5.63805
8.75385	8.8173	7.20015	7.22434
6.43941	6.54315	6.74866	6.55674
3.23957	2.91598	6.26256	6.10876
4.46733	3.68895	6.00303	5.84273
7.39944	7.64156	11.477	11.3919
3.31511	3.20517	5.34015	4.97341
1.37585	0.757406	4.16327	3.85232
1.02113	1.2007	8.21512	8.26579
4.00283	4.022	3.42183	2.74261
3.3072	4.4436	4.17385	3.73189
3.72917	2.8857	5.98001	5.81024
5.94165	5.65404	5.83836	5.6174
3.26934	2.64355	5.32555	4.47685
6.23413	6.05193	3.12894	2.8909
6.25943	6.34418	8.66782	8.64301
2.47712	1.92636	5.75127	5.48313
4.43372	3.94912	6.51206	6.24361
3.03316	2.81009	5.73028	5.13579
4.28742	4.09582	6.01121	6.05328
6.40412	6.01785	4.52379	4.2785
4.61772	4.38883	5.2701	4.63054
2.52993	1.35232	4.14404	3.68235
6.68332	6.98982	5.06315	4.14984
3.61051	3.12465	4.69804	4.52978
4.85451	4.38477	5.49894	5.48593
3.93068	3.39579	8.12729	7.87366
1.50295	1.91275	7.66536	7.77573
5.12322	4.75598	2.45284	1.64692
3.61347	3.32623	8.21446	7.87383
1.42611	0.944613	4.54216	3.96041
4.30994	4.00053	5.94324	5.63567
2.91029	2.40487	6.49392	6.49307
8.17609	7.99483	7.39308	7.26418
7.11406	7.07465	3.39623	2.85023
5.93877	5.38352	3.1364	2.14744
5.52829	5.37633	5.52676	5.4379
1.10597	1.46997	6.11674	5.99071
4.45669	4.33956	0.572287	6.01239
4.81211	4.93805	5.9623	5.81882
3.76995	3.64872	3.7057	2.53002
2.48679	2.37686	6.05046	6.07281
7.73071	7.76349	6.31572	5.96401
2.50595	1.95434	6.78618	6.20129
5.01981	4.8229	6.47897	6.26921
4.6756	4.32682	3.92704	3.81777
2.56334	1.60541	5.4991	4.55822
3.38726	3.32979	3.20576	1.63915
3.53093	2.91275	6.27365	5.86627
0.840189	0.367685	6.47918	6.73503
5.14072	5.13075	5.06307	4.64888
3.48174	3.21948	3.90272	3.09744
5.08411	4.81201	4.41213	4.27732
4.63604	4.69033	4.38517	5.47334
5.31136	5.38166	2.44281	2.16295
7.50044	7.49381	6.27628	6.62854
8.02849	8.12281	6.19177	6.01879
5.03278	4.35383	4.41874	3.60579
7.13298	7.37762	6.86253	6.55743
4.81601	4.48797	4.06501	3.45433
1.4106	0.818795	4.33868	3.86228
4.65463	4.82115	2.73937	1.50228
2.94936	2.17429	2.95175	2.26826
6.46621	6.31197	6.18858	6.26505
2.11776	1.92279	4.05596	4.1355
3.7531	3.54581	5.7233	5.58615
7.79081	7.39329	2.20519	2.95353
4.50624	2.87206	2.54919	3.00629
4.39491	4.5931	6.09663	5.86079
4.98929	4.55271	4.95962	4.67659
7.43257	7.59925	5.63518	5.38352
6.64103	6.47511	4.11413	3.63216
7.293	7.31173	7.10917	7.45807
5.25652	5.09079	7.16541	7.47372
5.90648	5.65881	3.99158	3.41216
5.59128	5.42284	3.95357	2.94552
5.5225	5.3451	5.08302	4.99426
2.90572	2.26427	7.06963	7.10673
4.71872	4.68551	6.13604	5.98197
5.15503	4.88059	3.91794	2.88351
5.93692	5.6597	2.87423	2.09585
4.80449	4.55559	5.76363	5.72324
4.87392	4.82288	3.27469	2.97031
4.67582	4.13293	5.82142	6.09191
5.57341	5.38871	5.10787	4.9573
5.21265	5.20155	5.25013	5.20155
5.09997	4.68006	4.6192	4.29768
2.04212	1.19666	5.55415	5.54689
0.699199	0.741269	5.12834	5.03982
6.27054	6.12473	1.51677	0.906759
3.54513	2.45549	6.43309	6.44018
3.33966	3.40869	3.24524	3.38352
1.93569	2.52525	5.99624	5.64836
3.59671	3.57907	2.48908	1.62426
6.24217	6.15683	6.30208	6.13359
5.67866	5.49639	6.10395	5.86171
7.21434	7.15175	5.44567	5.23498
2.69494	2.38909	5.42812	4.99847
4.59924	4.48377	2.87911	1.67725
6.98032	6.87381	5.35677	4.87936
1.28608	0.435061	5.09152	5.29586
0.130915	0.172985	3.11547	3.35824
7.97535	7.91616	4.57136	4.03473
5.7477	5.71342	4.82141	4.52958
4.56038	3.84836	4.54233	4.45978
4.01492	4.05699	6.8528	6.28079
3.98078	3.70943	1.57736	0.671895
4.44836	4.3794	1.79196	1.5753
3.58816	2.79069	3.94247	3.98454
5.32165	4.70961	5.72711	5.56888
2.23225	1.73375	6.05743	5.64375
6.82175	5.99073	2.16882	0.625923
5.89562	5.92302	5.99932	6.34415
5.65787	5.71606	4.49671	4.08366
4.72053	4.3463	6.27232	6.26868
8.19301	8.17055	3.19461	2.26583
2.77789	1.74794	6.30698	6.66233
4.69486	4.55027	2.14764	1.38862
5.30342	5.03737	5.62672	5.40236
5.34065	4.91765	4.34726	5.06957
5.42437	5.4561	3.91517	3.99774
3.72126	3.51179	3.37276	3.22841
4.43042	4.48227	3.97222	4.21021
2.96044	3.1803	6.91273	6.92997
8.18167	8.45723	5.25762	4.84109
2.56314	1.16939	2.83692	2.51493
5.08154	4.86909	6.84936	6.73943
7.59538	7.57696	3.38856	3.28253
5.57333	5.08699	4.98168	4.17974
5.70656	5.78367	4.95196	4.70452
5.22401	5.19433	2.38726	1.66379
6.05968	6.08164	2.41279	2.20693
5.41315	5.51457	6.23416	5.7842
4.54613	4.39872	4.88107	4.36151
6.24701	6.18993	7.68195	7.79189
5.57586	5.38845	7.97222	8.05297
4.53147	3.59804	5.75135	5.53679
4.34379	2.94488	0.729361	0.127574
3.16	2.46131	7.51048	6.94151
0.839767	0.766359	1.84637	1.77109
4.46492	3.6035	6.12825	5.80908
5.69819	5.18421	6.23525	6.25401
4.32821	3.94365	4.57747	4.20181
5.69498	5.61559	6.26211	5.87301
6.85858	7.04399	5.49858	4.99042
6.88225	6.67711	6.02366	6.05837
0.244297	1.28637	5.77627	5.32695
3.54894	3.56882	5.89391	6.06003
1.80544	1.46049	5.70871	4.96651
1.55284	1.02723	5.35379	4.96182
1.07336	0.437362	4.95469	4.76788
3.25006	1.88043	2.3909	1.5585
5.63993	5.20395	8.74848	8.86184
2.84046	2.21858	4.43788	3.63989
3.61679	3.51447	6.41042	5.94277
3.73406	3.02988	5.29415	5.46175
2.53781	2.17779	6.08103	5.61249
4.33705	4.22888	4.94622	4.93485
5.04261	4.87723	7.75613	7.71968
3.15942	2.83892	3.72068	2.43652
4.81827	4.68431	4.71439	4.21551
3.58755	3.59925	2.5219	2.11522
5.98068	5.69765	3.39988	2.85699
4.23836	4.44171	2.52861	1.8903
4.25137	4.16791	4.56935	3.24017
4.41034	4.45241	3.99198	3.44171
1.75683	1.18304	4.8711	3.64727
3.42234	2.34242	4.40561	4.02976
0.620007	0.109535	5.87432	6.08336
7.12641	6.97809	6.64732	6.49424
4.2493	3.45351	9.4387	9.47897
4.60631	4.65481	7.63551	7.52964
3.82392	4.11456	4.91579	4.45382
4.73522	4.1901	6.73017	6.14877
0.306092	0.222631	7.95013	8.07354
4.8916	4.85413	9.02539	9.2338
4.31046	4.01549	7.11135	6.95185
2.99424	2.19579	8.05739	8.1993
2.37427	1.96735	3.06286	3.13241
2.29104	1.28248	6.47679	6.68017
2.00094	1.36183	4.10972	3.44725
7.17415	7.07872	7.31018	7.38462
4.231	3.47526	3.09029	2.5197
6.70573	6.44842	4.65315	4.60686
6.10255	5.70569	4.94009	4.83879
3.96846	2.82014	2.8988	1.88775
4.48679	4.20693	7.31102	7.28438
6.12602	5.79596	2.91161	2.59925
4.30974	4.03569	9.92552	10.098
5.83536	5.81349	9.94732	10.0824
3.06471	2.02839	3.43598	2.66269
3.99283	3.12416	3.46768	2.82937
6.22703	6.01974	4.10112	3.81198
2.27093	1.81874	4.89317	4.44533
2.35267	1.53675	9.60426	9.71323
4.74375	3.83959	4.2732	3.48499
2.18616	2.01964	5.19284	5.12738
7.6514	7.76612	4.68534	3.91644
6.38726	5.73549	3.39705	2.70215
5.82093	5.44378	5.15794	4.70771
5.38008	5.77553	7.51089	7.62185
1.45211	0.531337	2.00969	2.99518
7.17799	7.06444	5.617	5.29537
4.69211	4.53169	5.49731	5.81661
2.9932	2.11267	5.28226	5.357
5.90056	5.96746	4.91626	4.56754
1.91332	2.57988	2.08824	1.47823
4.45642	3.95289	6.87351	6.73464
4.69616	3.51346	7.37096	7.74391
3.42508	3.07174	2.93943	2.56646
4.77731	4.55089	5.23525	4.81337
2.43788	2.8699	2.77667	2.86454
4.81108	4.64846	4.96476	4.67176
5.55718	5.39866	5.04026	4.46774
4.03135	3.82767	6.13689	5.17544
3.63118	2.75571	6.09875	6.01429
5.11229	4.75464	4.98971	5.06613
4.78487	4.56852	4.67369	3.85778
5.13475	4.1021	4.59483	4.32507
4.27416	4.36493	3.73684	3.64505
2.45165	1.11262	3.51429	1.95472
2.36454	1.72478	7.35555	7.75985
5.73453	5.71051	3.08566	2.94269
5.63642	5.59199	8.84146	8.86944
5.84762	5.77619	4.33067	3.31385
5.27401	5.23566	6.06889	6.01919
5.14618	4.82337	4.12079	3.77838
6.33479	5.91528	7.36454	7.28496
2.72455	1.69027	8.87911	9.06284
5.91438	5.72839	3.33713	3.56363
3.54199	2.67069	5.50633	4.904
4.53388	4.67325	6.62521	6.66084
7.61822	7.60079	9.20327	9.3873
4.83378	4.98802	9.17053	9.36478
7.05909	7.29736	5.20873	5.06873
4.65029	3.89747	7.75881	7.78877
2.31745	1.50708	5.51631	5.51631
4.5836	3.66016	8.64195	8.59925
3.87334	2.86838	7.06027	7.0632
5.19153	5.28805	10.7221	10.8907
5.41666	5.192	7.01382	7.11505
5.73045	5.74252	7.97222	7.82019
6.05949	6.0875	6.66152	6.65979
5.8929	5.87899	5.91882	5.95653
6.16144	5.88278	4.59732	4.0632
6.1072	6.14268	7.9185	8.12042
4.92134	4.6322	6.31356	5.5819
6.50329	6.29768	4.55576	3.95061
5.62969	5.35689	5.72956	5.53138
4.76836	4.2468	5.37734	5.43782
8.86567	8.9619	7.66736	7.70412
4.71954	4.72545	5.34464	5.40189
5.59211	5.44252	1.7724	1.37837
5.58008	5.1092	4.62713	4.15763
4.73965	3.58631	3.26217	2.69483
5.89922	5.41022	4.52823	4.30336
5.78851	5.45651	6.5846	6.79772
5.14526	5.26402	2.82237	2.07137
4.08476	4.04125	4.29055	3.45094
7.04984	7.01791	3.83421	3.42932
4.96973	4.65775	7.36392	6.93566
1.50655	1.13359	4.0557	3.149
1.61573	0.783333	5.67806	5.01186
5.14453	5.11812	3.82284	3.21283
4.45764	4.26683	0.0128597	0.054929
5.45631	5.32795	2.90993	2.22209
2.16265	1.57245	7.49362	7.7032
3.26808	2.68866	3.44362	3.48569
5.15612	5.00616	4.63213	4.10637
5.9569	6.03446	6.27707	5.9956
1.87804	0.987219	4.90991	4.53124
6.38878	6.14287	6.69054	6.8173
0.854608	0.366162	12.0299	12.0039
4.24756	4.041	4.49888	4.09079
4.42545	4.31012	6.07975	6.17656
5.50801	4.80024	4.2076	4.78732
4.63348	4.03715	3.9997	2.35824
4.03458	2.82247	5.1452	4.95561
8.43496	8.48263	3.78215	4.0729
4.57405	4.27732	5.31617	4.78145
7.35648	7.38449	5.25539	5.01429
6.43067	6.14787	5.82021	5.15179
3.6378	2.85675	8.41968	8.50681
5.30895	5.4042	2.87646	1.70553
4.13928	3.80893	4.47918	4.07379
4.10139	3.23838	3.8989	3.75903
6.13442	6.00269	5.13744	4.47158
4.73201	4.27289	6.945	7.01549
3.32111	3.08078	10.2769	10.4888
5.31207	5.22652	2.77901	2.18814
7.37578	7.48624	7.70708	7.39487
3.54045	3.44116	7.09403	6.51601
8.10322	8.11583	6.63735	6.51163
1.61943	0.539507	4.94659	4.77143
5.60335	5.59455	2.27707	2.1307
3.11103	2.94922	8.7579	8.88285
5.17823	5.21459	2.99212	2.23668
2.40393	1.83595	6.46698	6.70053
2.81468	3.24377	7.15806	6.7438
5.15863	5.21257	7.44718	7.87464
6.23612	6.27385	6.02834	5.90554
3.26229	2.36981	5.32369	4.88423
4.23716	3.0632	5.6215	5.50721
4.448	4.38664	1.94985	1.16184
3.90343	3.73835	6.66668	6.69672
5.58633	5.47104	2.39529	2.41311
1.42942	0.176038	4.76175	4.5416
2.42225	1.46432	3.27951	2.79189
3.87781	2.89665	7.59982	7.58475
5.56531	5.53252	3.89693	3.13164
2.98746	2.96304	9.2283	9.31751
3.95736	3.38045	4.79922	4.78742
3.20926	2.20693	10.9765	11.1939
3.71729	2.99382	3.47333	3.04828
0.678859	0.881393	10.2248	10.2894
3.08195	2.27967	9.09264	9.14357
1.69822	1.11226	3.16954	2.88266
3.90018	3.41925	4.39404	3.8937
3.71748	3.41889	6.64997	6.64883
3.73726	3.25208	3.99328	3.44252
5.08043	4.93608	11.7959	12.0029
4.80309	4.68596	4.84335	4.60258
2.41241	2.48619	4.4471	3.62962
0.0702679	0.112337	3.40485	2.28027
2.47222	1.33371	3.51544	3.11694
7.75559	7.40555	1.46972	2.68171
4.80903	4.18552	7.32598	7.28424
3.93052	2.91815	4.56978	4.13268
4.14561	3.78493	5.3923	5.12532
2.25706	1.88409	4.23886	2.93628
2.62533	2.13473	6.84637	7.08719
5.54816	5.0866	9.04809	9.21655
2.7226	2.98707	8.14648	7.95807
3.15508	2.12676	0.901828	2.20693
5.2203	5.2243	4.35507	4.11005
4.69685	4.42932	2.36589	1.48031
2.74359	2.16753	3.63486	3.33744
2.57736	1.50013	3.81244	3.45241
5.08015	4.21572	8.40984	8.55118
3.80484	2.95444	7.20195	7.35329
0.874065	0.145616	2.59307	1.42299
4.60915	4.36762	8.18908	8.33105
4.08734	3.89419	4.51971	3.77328
6.43854	6.2093	3.98981	3.96934
7.40327	6.96715	6.27832	6.44238
8.31457	8.33376	5.95348	5.53258
3.21774	3.04656	9.6498	9.71989
3.66018	2.5001	5.06694	4.71789
7.61816	7.35334	3.9618	3.95604
2.94365	2.51179	3.9857	3.49875
3.61722	3.26501	3.0288	2.291
3.77696	3.00971	2.94482	1.86715
5.29322	5.07337	6.963	6.81638
4.08896	3.43344	5.63592	5.32916
3.86187	3.81231	1.38726	1.16629
7.25385	7.45929	7.63414	7.83569
4.85674	4.6103	8.95454	9.06253
6.38228	6.57346	4.06223	3.08084
3.89092	3.69483	2.0139	0.881475
7.72441	7.60873	5.88416	5.95618
5.93539	5.60318	4.17559	3.70309
4.56504	4.44987	9.69325	9.83756
7.06814	6.77982	3.33479	2.59335
4.95839	4.32071	1.20486	0.0149862
2.00157	0.994728	4.89098	4.48239
3.33479	3.27732	6.51199	6.43804
3.60714	3.18129	6.53132	6.39083
6.32271	6.11509	7.22327	7.30542
5.99783	5.93103	5.6686	5.08618
5.30063	4.72542	5.48548	4.86228
3.6378	3.70063	3.36396	1.83933
2.87761	2.71322	4.1614	4.11327
3.76363	3.44313	6.33239	5.72518
1.83784	1.87991	4.80324	4.91204
5.72552	5.68475	6.83049	6.27415
7.35106	7.24822	5.76	5.65269
2.94913	2.56057	1.17725	0.326231
3.08531	2.82253	6.32271	6.12976
7.24489	7.3342	4.02935	3.38017
2.82402	2.16248	7.42861	7.17165
5.35073	5.35057	4.66289	4.50333
4.74229	4.61632	3.77649	3.57755
3.24963	2.41723	4.40611	4.01429
2.30644	2.08548	3.61937	2.4056
1.4825	0.903084	5.51791	5.14817
1.93058	1.34816	2.62251	2.30201
5.99964	5.85521	6.21282	5.88697
4.24524	3.89809	3.88675	3.73327
2.51469	1.91584	4.02771	3.11797
3.69583	3.10986	4.72881	4.39937
2.90113	1.22074	2.94895	1.58766
3.09566	2.32344	0.884755	2.24875
3.60787	3.41142	8.99902	9.09253
4.53138	4.53578	6.69873	6.7807
5.11146	4.98768	7.41922	7.39922
4.03984	3.86873	6.51394	6.42354
1.4381	0.461315	5.1021	4.78023
1.04411	0.823146	3.97453	3.7093
2.90001	2.59242	6.65204	7.0625
2.3706	1.49633	5.23525	5.38585
2.62054	2.39053	1.95727	0.584299
2.53257	2.07325	10.2963	10.5473
1.41877	0.875873	5.94369	5.73991
3.12637	1.7986	6.29994	6.01912
3.45815	3.19715	2.05893	1.58643
3.65493	3.19148	5.37968	5.54124
4.69181	3.12144	0.594547	0.177185
3.61163	3.42237	3.38726	2.42932
1.70856	1.50551	5.62532	5.43998
5.55718	5.50893	6.22573	6.18927
1.15119	0.456292	6.48853	6.43157
1.60671	0.326853	5.60714	4.71796
3.90605	3.36936	7.18795	7.19323
4.62644	3.99044	2.30342	1.85451
5.66653	5.86795	5.98412	5.34405
6.51053	6.52179	5.49543	5.3962
4.89293	4.54954	6.24611	6.35632
1.43579	0.860109	4.84348	5.21898
5.41866	4.83321	6.17112	6.18002
3.1507	2.26763	3.08173	2.53884
5.34464	5.36694	6.27657	6.2712
0.371314	1.41338	3.88856	3.41913
3.82629	3.76796	4.36096	3.65112
4.62502	3.60914	5.1683	4.92187
4.25762	4.04317	6.32946	6.24668
7.02185	7.11435	6.48944	6.31085
2.67714	3.20902	5.2189	4.66851
2.54311	2.81964	3.52269	3.07
3.56364	3.20207	3.29159	3.70981
2.09229	2.67868	1.737	1.77907
7.38635	7.15833	4.7108	4.96901
2.61347	1.79572	5.4143	5.57397
8.07814	8.12318	4.32442	3.79286
2.85305	2.23615	3.37727	2.81166
6.65404	6.49541	7.43236	7.40884
5.08934	4.88348	4.25462	4.30866
1.51279	1.27106	4.07719	3.70783
4.13598	3.83371	1.87706	1.70763
3.94156	3.84815	6.56868	5.68513
5.26869	5.37838	4.27178	4.33177
4.48539	3.81964	6.43358	6.29189
3.97502	3.53334	3.41403	3.07862
3.28007	3.02127	8.28436	8.46661
3.94011	3.40632	4.70263	4.55915
3.63503	3.40618	4.03717	3.48061
3.21667	2.59132	2.17181	1.35259
4.44429	4.89298	6.74817	6.21223
5.61781	5.35946	6.35569	6.18608
3.90809	3.53512	8.04261	8.03221
2.88317	2.53697	5.22534	4.86886
2.56593	2.17737	8.45814	8.6103
6.56923	6.55001	6.58728	6.34315
1.13465	0.00679247	5.58872	5.5382
3.6338	3.18712	6.61806	6.3187
2.93352	2.47989	5.76229	5.57907
3.24919	3.61319	8.41937	8.61948
5.69284	5.80705	7.67666	7.79533
4.40558	3.76557	2.08222	1.34668
4.14294	4.06758	6.38939	6.48255
3.65029	3.10175	2.54901	2.21911
8.11852	8.14927	6.37231	6.36708
3.81928	3.48938	2.93513	2.59191
2.81937	2.33469	5.86034	4.47412
5.00221	4.8643	7.54784	7.6652
3.41892	2.87603	5.99424	5.9692
4.20123	4.19326	0.0814468	0.708479
3.88507	3.52786	3.19016	2.77852
5.6114	5.61148	2.17044	2.13234
4.44786	4.34133	4.38647	4.18105
5.98081	5.76644	5.9822	6.36792
3.41378	3.31952	5.56182	4.80653
8.10028	8.00892	4.70999	3.90985
3.45482	1.91193	7.82209	7.93805
4.5928	4.53471	4.26416	3.66349
6.9254	6.84056	6.36095	6.20308
0.847522	0.889591	2.86203	1.93805
3.78326	2.95539	6.8063	6.77336
4.76008	4.64372	4.21038	3.89881
5.27281	5.02057	3.61327	3.65534
6.31617	5.78594	3.33479	3.65439
3.05822	2.42222	6.91146	5.95353
3.35688	2.75125	6.65515	5.0917
5.30654	4.63929	3.49969	2.84718
5.62577	5.42425	4.25491	4.30779
8.2192	8.28653	1.11977	0.313847
5.49219	5.12414	4.75559	4.79766
2.51049	2.34902	7.49757	7.62984
2.64815	2.15257	4.31461	3.87936
6.3801	6.32614	0.538854	0.121491
6.57362	6.51891	2.95146	2.99353
5.30945	5.02387	5.05271	4.31237
1.49027	0.929002	3.61622	3.53028
4.08662	3.46807	6.32147	6.3883
3.40895	3.26757	3.86772	3.87899
2.19633	1.34693	3.89738	2.74681
8.7675	8.80133	5.5193	4.978
4.37628	3.92409	3.17016	2.41868
6.12376	5.98663	6.09997	5.75125
5.55367	5.35154	4.20124	4.4975
5.35879	5.275	3.42594	3.83058
1.91686	1.80365	0.122949	0.357664
0.368877	0.517861	2.3844	2.34703
[truncated: 8,979 more rows]
