# Supplementary material for: Dynamic m6A methylation facilitates mRNA triaging to stress granules
Source: Life Sci Alliance. 2018 Jul 3;1(4):e201800113. doi: 10.26508/lsa.201800113 (PMC6238392; doi:10.26508/lsa.201800113)
Supplement: Supplementary file 8 [file LSA-2018-00113_SdataF7.xlsx]

## Sheet: Figure S3G
Disribution of predicted DRACH motifs				DRACH motifs within transcript regions
	SGs	translated			SGs	translated		p values
5UTR	0.00736927	0.0246114		5UTR	3625	75		p = 1.4x10-3	Mann-Whitney test
	0.00896334	0.0207254		CDS	23481	246
	0.00930305	0.0142487		3UTR	11383	66
	0.0098257	0.0259067		Sum	38489	387
	0.00953824	0.0233161
	0.00964277	0.0194301		In percenatge
	0.00993023	0.0233161			SGs	translated
	0.0097473	0.0129534		5UTR	9.41828	19.3798
	0.0102699	0.011658		CDS	61.007	63.5659
	0.0101393	0.0181347		3UTR	29.5747	17.0543
CDS	0.0668984	0.0725389
	0.0628479	0.0751295
	0.0590326	0.0725389
	0.0615935	0.0699482
	0.0602085	0.0569948
	0.0602869	0.0569948
	0.0602347	0.0608808
	0.0604176	0.0582902
	0.0616981	0.0556995
	0.0602869	0.0518135
3UTR	0.0369509	0.0220207
	0.0320119	0.0181347
	0.0316722	0.0168394
	0.0310189	0.0220207
	0.0280921	0.0194301
	0.029059	0.015544
	0.0294771	0.0168394
	0.0275956	0.0103627
	0.0260015	0.00906736
	0.0198866	0.0129534
