# Supplementary material for: Dynamic m6A methylation facilitates mRNA triaging to stress granules
Source: Life Sci Alliance. 2018 Jul 3;1(4):e201800113. doi: 10.26508/lsa.201800113 (PMC6238392; doi:10.26508/lsa.201800113)
Supplement: Supplementary file 12 [file LSA-2018-00113_SdataF11.xlsx]

## Sheet: Figure 2E
Metagene profiles of m6A distribution for SG-clients					m6A sites within transcript regions
	Control	500 µM AS				Control	500 µM AS		p values
5UTR	0.000974865	0.00132648			5UTR	421	603		p = 1.4x10-3	Mann-Whitney test
	0.00190735	0.00265296			CDS	1222	1584		p = 1.6x10-2	Mann-Whitney test
	0.00182257	0.00269441			3UTR	1155	1169
	0.00169542	0.00211408
	0.0017378	0.00281877
	0.00211927	0.00273586
	0.00161065	0.00232134
	0.0020345	0.00281877
	0.00186496	0.0025286
	0.00207689	0.00298458
CDS	0.00779892	0.0102802
	0.00491671	0.00596916
	0.0043657	0.00493285
	0.00402662	0.00547173
	0.00402662	0.00534737
	0.00500148	0.0057619
	0.00423855	0.0057619
	0.00313652	0.00455977
	0.00500148	0.00704692
	0.00928241	0.0105289
3UTR	0.0134362	0.0138451
	0.00830755	0.00845631
	0.00580681	0.00621787
	0.00508625	0.00480849
	0.00330607	0.00319184
	0.00279744	0.00327475
	0.00296698	0.00269441
	0.00245836	0.00215553
	0.00224643	0.00227989
	0.00216166	0.00140938
