# Supplementary material for: Dynamic m6A methylation facilitates mRNA triaging to stress granules
Source: Life Sci Alliance. 2018 Jul 3;1(4):e201800113. doi: 10.26508/lsa.201800113 (PMC6238392; doi:10.26508/lsa.201800113)
Supplement: Supplementary file 13 [file LSA-2018-00113_SdataF12.xlsx]

## Sheet: Figure 2F
TRIM65 (ENST00000269383) methylation profile
Position	Control [coverage]	500 µM AS [coverage]
1	0	4
2	0	4
3	0	4
4	0	5
5	0	5
6	0	5
7	0	5
8	0	5
9	0	5
10	0	5
11	0	5
12	0	5
13	0	5
14	0	5
15	0	5
16	0	5
17	0	5
18	0	5
19	0	5
20	0	5
21	0	5
22	0	5
23	0	5
24	0	5
25	0	5
26	4	14
27	4	14
28	4	14
29	4	15
30	4	15
31	4	15
32	4	15
33	4	16
34	5	16
35	5	16
36	5	16
37	5	16
38	5	16
39	5	16
40	5	16
41	5	16
42	5	16
43	5	16
44	5	16
45	4	15
46	4	14
47	4	14
48	4	14
49	4	14
50	4	11
51	4	11
52	4	11
53	4	11
54	4	11
55	4	11
56	3	11
57	3	9
58	3	8
59	3	8
60	3	8
61	3	8
62	3	8
63	3	8
64	3	8
65	2	8
66	2	8
67	3	8
68	3	8
69	3	8
70	3	8
71	3	7
72	3	7
73	3	7
74	3	6
75	1	2
76	1	2
77	1	3
78	1	3
79	1	3
80	1	3
81	1	3
82	1	2
83	2	3
84	2	3
85	2	3
86	2	3
87	2	3
88	2	3
89	2	4
90	2	4
91	2	4
92	2	4
93	2	4
94	2	4
95	3	4
96	3	4
97	3	5
98	3	5
99	3	5
100	3	5
101	3	5
102	3	5
103	2	5
104	4	5
105	4	5
106	6	5
107	6	5
108	6	6
109	6	6
110	7	6
111	7	6
112	7	6
113	7	6
114	7	6
115	6	6
116	6	7
117	6	8
118	5	7
119	5	6
120	5	6
121	5	6
122	5	6
123	5	8
124	5	8
125	7	8
126	7	7
127	7	7
128	7	7
129	8	7
130	8	7
131	9	7
132	12	7
133	12	8
134	12	8
135	11	8
136	10	8
137	10	8
138	9	8
139	9	8
140	9	8
141	9	8
142	9	8
143	9	8
144	8	8
145	8	8
146	8	9
147	8	9
148	8	9
149	8	10
150	8	10
151	7	10
152	10	11
153	10	11
154	12	15
155	13	16
156	13	16
157	13	17
158	13	18
159	13	17
160	13	17
161	12	17
162	12	17
163	9	17
164	8	17
165	8	17
166	8	17
167	8	18
168	9	18
169	9	18
170	9	20
171	11	20
172	11	20
173	11	20
174	11	20
175	11	20
176	11	20
177	11	19
178	11	19
179	11	23
180	11	23
181	11	22
182	10	23
183	10	23
184	9	22
185	7	22
186	6	21
187	6	21
188	6	21
189	6	21
190	6	21
191	6	20
192	5	20
193	4	20
194	4	20
195	4	19
196	4	19
197	3	16
198	1	11
199	1	11
200	1	11
201	1	11
202	1	10
203	1	10
204	1	9
205	1	9
206	0	8
207	0	8
208	0	8
209	0	8
210	0	6
211	0	6
212	0	6
213	0	6
214	0	6
215	0	6
216	0	6
217	0	6
218	0	7
219	0	7
220	0	7
221	0	6
222	0	5
223	0	5
224	0	4
225	0	5
226	0	6
227	0	5
228	0	4
229	0	4
230	0	4
231	0	4
232	0	4
233	0	4
234	0	4
235	0	4
236	0	4
237	0	3
238	0	3
239	0	3
240	0	3
241	0	3
242	0	3
243	0	3
244	0	3
245	0	3
246	0	4
247	0	4
248	0	4
249	0	5
250	0	5
251	0	8
252	0	8
253	0	9
254	0	9
255	0	9
256	0	9
257	0	9
258	0	9
259	0	9
260	0	9
261	0	9
262	0	7
263	0	7
264	0	7
265	0	7
266	0	7
267	0	7
268	0	7
269	0	7
270	0	7
271	0	7
272	0	6
273	0	6
274	0	6
275	0	6
276	0	6
277	0	6
278	0	6
279	0	6
280	0	6
281	0	6
282	0	6
283	0	6
284	0	6
285	0	5
286	0	3
287	0	3
288	0	2
289	0	0
290	0	0
291	0	0
292	0	0
293	0	0
294	0	0
295	0	0
296	0	0
297	0	0
298	0	0
299	0	0
300	0	0
301	0	0
302	0	0
303	0	0
304	0	0
305	0	0
306	0	0
307	0	0
308	0	0
309	0	0
310	0	0
311	0	0
312	0	0
313	0	0
314	0	0
315	0	0
316	0	0
317	0	0
318	0	0
319	0	0
320	0	0
321	0	0
322	0	0
323	0	0
324	0	0
325	0	0
326	0	0
327	0	0
328	0	0
329	0	0
330	0	0
331	0	0
332	0	0
333	0	0
334	0	0
335	0	0
336	0	0
337	0	0
338	0	2
339	0	2
340	0	3
341	0	3
342	0	3
343	0	3
344	0	3
345	0	3
346	0	3
347	0	3
348	0	3
349	0	3
350	0	3
351	0	3
352	0	3
353	0	3
354	0	3
355	0	3
356	0	3
357	0	3
358	0	3
359	4	4
360	4	4
361	4	4
362	4	4
363	4	5
364	4	5
365	4	5
366	4	6
367	4	7
368	4	9
369	4	9
370	4	10
371	4	12
372	4	13
373	4	13
374	4	15
375	4	16
376	4	16
377	4	16
378	5	16
379	5	15
380	5	16
381	5	17
382	5	20
383	5	19
384	6	20
385	8	20
386	8	20
387	5	20
388	9	29
389	9	29
390	8	32
391	8	34
392	8	34
393	8	34
394	8	35
395	8	35
396	8	35
397	8	34
398	8	34
399	8	34
400	8	34
401	8	34
402	9	35
403	9	35
404	9	35
405	9	32
406	9	32
407	9	30
408	10	30
409	10	30
410	10	30
411	10	30
412	10	28
413	10	28
414	10	28
415	10	28
416	10	28
417	10	27
418	10	27
419	10	27
420	9	26
421	9	26
422	9	26
423	8	24
424	8	23
425	7	23
426	7	23
427	5	19
428	5	16
429	5	14
430	5	13
431	4	5
432	3	5
433	2	3
434	2	2
435	1	2
436	1	2
437	0	1
438	0	1
439	0	1
440	1	1
441	1	1
442	1	1
443	1	1
444	1	1
445	1	1
446	1	1
447	1	1
448	1	1
449	1	1
450	1	1
451	1	1
452	1	1
453	1	1
454	1	1
455	1	1
456	1	1
457	1	1
458	1	1
459	1	0
460	1	0
461	1	0
462	1	0
463	1	0
464	1	1
465	1	1
466	1	1
467	1	1
468	1	1
469	1	1
470	1	1
471	1	1
472	0	1
473	0	2
474	0	3
475	0	3
476	0	3
477	0	3
478	0	3
479	0	3
480	0	3
481	0	3
482	0	3
483	0	3
484	0	3
485	0	3
486	0	3
487	0	3
488	0	3
489	0	3
490	0	3
491	0	3
492	0	3
493	0	3
494	0	3
495	0	3
496	0	3
497	0	3
498	0	3
499	0	3
500	0	3
501	0	3
502	0	3
503	0	2
504	0	2
505	0	2
506	0	2
507	0	2
508	0	2
509	0	2
510	0	2
511	0	2
512	0	2
513	0	2
514	0	2
515	0	2
516	0	2
517	0	2
518	0	1
519	0	1
520	0	1
521	0	1
522	0	0
523	0	0
524	0	0
525	0	0
526	1	0
527	1	1
528	1	1
529	1	1
530	1	1
531	1	1
532	1	1
533	1	1
534	1	1
535	1	1
536	1	1
537	1	1
538	1	1
539	1	1
540	1	1
541	2	1
542	2	1
543	2	1
544	2	1
545	2	1
546	2	1
547	2	1
548	2	1
549	2	1
550	2	1
551	2	2
552	2	2
553	2	2
554	2	2
555	2	2
556	2	2
557	2	2
558	2	2
559	4	5
560	4	4
561	4	4
562	4	4
563	4	4
564	4	4
565	4	4
566	4	4
567	4	4
568	4	4
569	4	4
570	4	4
571	4	4
572	4	7
573	4	7
574	4	7
575	4	8
576	4	8
577	4	9
578	4	12
579	4	12
580	5	12
581	5	12
582	5	12
583	5	12
584	5	12
585	5	12
586	5	12
587	4	12
588	4	12
589	8	23
590	8	23
591	8	23
592	8	25
593	8	24
594	8	22
595	8	22
596	8	22
597	7	22
598	7	22
599	7	22
600	7	22
601	7	22
602	7	22
603	6	22
604	6	22
605	6	22
606	6	22
607	6	22
608	6	22
609	6	22
610	6	22
611	6	23
612	6	24
613	6	24
614	6	24
615	6	24
616	6	24
617	3	23
618	3	23
619	1	24
620	1	24
621	1	22
622	1	19
623	1	18
624	1	17
625	1	16
626	1	14
627	1	14
628	1	14
629	2	14
630	2	14
631	2	14
632	2	9
633	2	8
634	2	8
635	2	7
636	2	7
637	2	7
638	2	7
639	2	7
640	2	8
641	1	7
642	1	7
643	1	7
644	1	7
645	2	7
646	2	7
647	2	7
648	2	7
649	2	7
650	2	7
651	2	7
652	3	7
653	3	7
654	3	7
655	3	6
656	3	6
657	7	6
658	7	6
659	7	6
660	7	3
661	8	2
662	8	1
663	8	1
664	7	1
665	7	1
666	7	1
667	7	1
668	7	1
669	7	1
670	6	1
671	6	1
672	6	1
673	6	1
674	6	1
675	6	1
676	6	3
677	6	3
678	6	3
679	6	3
680	6	3
681	6	3
682	5	3
683	5	3
684	5	3
685	5	3
686	5	3
687	5	3
688	5	3
689	4	2
690	4	3
691	4	3
692	4	3
693	3	3
694	3	3
695	3	3
696	3	3
697	3	3
698	3	3
699	1	3
700	1	3
701	1	4
702	1	4
703	1	4
704	1	4
705	1	4
706	1	4
707	1	3
708	0	3
709	0	3
710	0	3
711	0	3
712	0	3
713	0	3
714	0	3
715	0	3
716	0	3
717	0	3
718	0	3
719	0	3
720	0	3
721	0	3
722	0	3
723	0	3
724	0	3
725	0	3
726	0	3
727	0	3
728	0	5
729	0	5
730	0	5
731	0	5
732	0	5
733	0	5
734	0	6
735	0	7
736	0	7
737	0	7
738	0	7
739	0	6
740	0	6
741	0	6
742	0	6
743	0	6
744	0	5
745	0	5
746	0	5
747	0	6
748	0	6
749	0	6
750	0	6
751	0	6
752	0	6
753	0	6
754	0	6
755	0	6
756	0	5
757	0	5
758	0	5
759	0	5
760	0	5
761	0	5
762	0	5
763	1	4
764	1	4
765	1	4
766	1	4
767	1	4
768	1	2
769	1	2
770	1	2
771	1	2
772	1	2
773	1	2
774	1	2
775	1	2
776	1	2
777	1	2
778	1	1
779	1	1
780	1	1
781	1	1
782	1	1
783	1	1
784	1	1
785	1	2
786	1	2
787	1	2
788	1	2
789	1	2
790	1	2
791	0	2
792	0	2
793	0	2
794	0	2
795	0	2
796	1	1
797	1	1
798	1	1
799	1	1
800	1	1
801	1	1
802	1	1
803	1	2
804	1	2
805	1	2
806	1	2
807	1	2
808	1	2
809	1	3
810	1	3
811	1	3
812	1	3
813	1	3
814	1	3
815	1	3
816	1	3
817	1	3
818	2	5
819	2	5
820	2	5
821	2	5
822	2	5
823	2	5
824	2	5
825	2	5
826	3	5
827	3	5
828	3	5
829	3	5
830	2	5
831	2	5
832	2	5
833	2	5
834	2	5
835	2	5
836	2	5
837	2	5
838	2	5
839	2	5
840	2	5
841	2	5
842	2	5
843	2	5
844	2	5
845	2	5
846	2	5
847	1	3
848	2	3
849	2	3
850	2	3
851	2	3
852	2	3
853	2	2
854	2	2
855	2	4
856	3	5
857	3	5
858	3	4
859	3	4
860	3	5
861	3	5
862	3	6
863	4	6
864	4	6
865	4	6
866	3	6
867	3	6
868	4	6
869	4	6
870	4	6
871	4	7
872	4	7
873	4	7
874	4	7
875	5	7
876	5	7
877	5	6
878	5	6
879	5	6
880	5	7
881	5	7
882	5	7
883	5	7
884	5	7
885	5	7
886	4	9
887	4	9
888	4	11
889	3	11
890	3	11
891	3	11
892	3	11
893	2	11
894	2	11
895	2	10
896	2	11
897	2	11
898	3	11
899	3	9
900	3	8
901	4	8
902	4	8
903	4	8
904	4	8
905	4	7
906	3	7
907	3	7
908	3	7
909	3	6
910	3	6
911	3	6
912	3	6
913	3	6
914	3	6
915	2	6
916	2	6
917	2	6
918	2	6
919	2	6
920	2	6
921	2	6
922	2	5
923	2	5
924	2	5
925	2	5
926	2	5
927	2	5
928	2	3
929	1	3
930	1	3
931	2	3
932	2	4
933	2	4
934	2	4
935	1	3
936	1	3
937	1	3
938	1	3
939	1	3
940	1	3
941	1	3
942	1	3
943	1	4
944	1	4
945	1	4
946	1	4
947	1	4
948	1	4
949	1	4
950	1	4
951	1	5
952	1	5
953	1	5
954	1	5
955	1	5
956	1	5
957	1	7
958	1	7
959	1	7
960	1	7
961	1	7
962	1	7
963	1	7
964	1	7
965	1	7
966	1	7
967	1	7
968	1	7
969	1	7
970	1	6
971	1	7
972	1	7
973	1	8
974	2	8
975	1	8
976	1	8
977	1	8
978	1	8
979	1	8
980	1	8
981	1	7
982	1	7
983	1	7
984	1	7
985	1	7
986	1	7
987	1	7
988	1	7
989	1	6
990	1	6
991	1	6
992	1	6
993	2	6
994	2	6
995	2	6
996	4	6
997	5	6
998	5	4
999	5	4
1000	6	3
1001	6	3
1002	6	3
1003	6	3
1004	6	3
1005	7	4
1006	7	4
1007	7	4
1008	7	5
1009	7	5
1010	8	4
1011	8	4
1012	8	4
1013	10	4
1014	13	3
1015	13	3
1016	14	3
1017	14	3
1018	18	4
1019	18	4
1020	21	4
1021	21	4
1022	21	4
1023	21	4
1024	21	4
1025	21	4
1026	21	4
1027	21	4
1028	21	4
1029	23	4
1030	24	4
1031	24	4
1032	20	4
1033	20	4
1034	20	4
1035	20	4
1036	20	4
1037	20	4
1038	20	4
1039	19	3
1040	19	3
1041	19	3
1042	19	3
1043	22	3
1044	21	2
1045	21	2
1046	21	2
1047	19	2
1048	16	2
1049	9	1
1050	9	1
1051	7	1
1052	7	1
1053	7	1
1054	8	1
1055	17	2
1056	18	2
1057	18	2
1058	18	2
1059	20	4
1060	19	4
1061	19	4
1062	19	4
1063	19	5
1064	18	5
1065	18	5
1066	18	5
1067	18	5
1068	17	5
1069	17	5
1070	17	5
1071	17	5
1072	17	5
1073	17	6
1074	17	7
1075	17	7
1076	17	7
1077	17	7
1078	16	7
1079	16	9
1080	16	9
1081	18	9
1082	18	9
1083	18	9
1084	17	10
1085	17	10
1086	16	13
1087	14	13
1088	14	13
1089	14	14
1090	14	14
1091	13	17
1092	12	16
1093	11	18
1094	10	22
1095	10	23
1096	10	23
1097	10	23
1098	9	23
1099	9	22
1100	9	22
1101	9	22
1102	9	22
1103	9	22
1104	8	21
1105	8	21
1106	8	20
1107	8	20
1108	8	20
1109	8	20
1110	8	20
1111	8	20
1112	9	18
1113	9	18
1114	9	18
1115	9	18
1116	9	18
1117	9	18
1118	7	18
1119	7	18
1120	7	18
1121	7	18
1122	6	18
1123	6	17
1124	5	17
1125	4	17
1126	3	17
1127	3	17
1128	3	16
1129	2	16
1130	1	14
1131	1	15
1132	1	14
1133	1	13
1134	1	13
1135	1	10
1136	1	7
1137	1	6
1138	1	6
1139	0	4
1140	0	1
1141	0	1
1142	0	1
1143	0	1
1144	0	1
1145	0	1
1146	0	1
1147	0	1
1148	0	1
1149	0	1
1150	0	1
1151	0	2
1152	0	2
1153	0	2
1154	0	2
1155	0	2
1156	0	2
1157	0	2
1158	0	2
1159	0	2
1160	0	2
1161	0	2
1162	0	2
1163	0	2
1164	0	2
1165	0	4
1166	0	4
1167	0	4
1168	0	4
1169	0	5
1170	0	5
1171	0	4
1172	0	4
1173	0	4
1174	0	4
1175	0	4
1176	0	4
1177	0	4
1178	0	6
1179	0	6
1180	0	6
1181	0	6
1182	0	6
1183	0	6
1184	0	6
1185	0	6
1186	0	6
1187	0	6
1188	0	6
1189	0	6
1190	0	6
1191	0	6
1192	0	6
1193	0	6
1194	0	6
1195	0	6
1196	0	4
1197	0	5
1198	0	6
1199	0	6
1200	0	6
1201	0	7
1202	0	10
1203	0	11
1204	0	11
1205	0	11
1206	0	11
1207	0	11
1208	0	12
1209	0	11
1210	0	11
1211	0	11
1212	0	11
1213	0	11
1214	0	11
1215	0	11
1216	0	11
1217	0	11
1218	0	11
1219	1	13
1220	1	14
1221	1	14
1222	1	14
1223	1	15
1224	1	15
1225	1	15
1226	1	15
1227	1	16
1228	1	16
1229	1	16
1230	1	16
1231	1	17
1232	1	17
1233	1	17
1234	1	18
1235	1	18
1236	3	18
1237	3	18
1238	5	18
1239	9	20
1240	10	20
1241	10	19
1242	10	20
1243	10	19
1244	11	21
1245	11	20
1246	11	20
1247	11	19
1248	11	21
1249	11	22
1250	11	22
1251	11	19
1252	13	19
1253	13	19
1254	20	23
1255	20	23
1256	21	23
1257	20	22
1258	20	22
1259	20	21
1260	20	22
1261	20	22
1262	20	22
1263	20	23
1264	20	22
1265	18	22
1266	17	24
1267	16	24
1268	14	23
1269	14	22
1270	13	22
1271	13	24
1272	10	25
1273	10	24
1274	10	22
1275	10	23
1276	10	23
1277	10	24
1278	10	24
1279	9	24
1280	8	24
1281	6	23
1282	6	23
1283	5	23
1284	4	23
1285	4	23
1286	3	23
1287	3	23
1288	1	21
1289	1	21
1290	1	21
1291	1	20
1292	0	19
1293	0	18
1294	0	18
1295	0	18
1296	0	18
1297	0	18
1298	0	18
1299	0	18
1300	0	18
1301	0	18
1302	0	18
1303	0	15
1304	0	15
1305	0	12
1306	0	10
1307	0	10
1308	0	11
1309	3	12
1310	3	14
1311	3	15
1312	3	20
1313	4	20
1314	4	20
1315	4	20
1316	4	20
1317	4	18
1318	4	18
1319	4	17
1320	4	17
1321	4	17
1322	4	17
1323	4	17
1324	4	18
1325	4	18
1326	4	18
1327	4	18
1328	4	18
1329	4	18
1330	4	18
1331	4	18
1332	4	17
1333	4	17
1334	4	17
1335	4	17
1336	2	17
1337	2	17
1338	2	17
1339	2	17
1340	2	16
1341	2	16
1342	2	16
1343	2	16
1344	2	16
1345	1	15
1346	1	15
1347	1	15
1348	1	15
1349	1	15
1350	1	15
1351	1	15
1352	0	14
1353	0	14
1354	0	14
1355	0	13
1356	0	13
1357	0	10
1358	0	9
1359	0	7
1360	0	7
1361	0	5
1362	0	5
1363	0	5
1364	0	4
1365	0	4
1366	0	4
1367	0	4
1368	0	4
1369	0	4
1370	0	4
1371	0	4
1372	0	4
1373	1	3
1374	1	3
1375	1	3
1376	1	3
1377	1	3
1378	1	3
1379	1	3
1380	1	3
1381	1	3
1382	1	3
1383	1	3
1384	1	3
1385	1	3
1386	1	3
1387	1	3
1388	1	3
1389	1	4
1390	1	4
1391	1	3
1392	1	3
1393	1	3
1394	1	3
1395	1	3
1396	1	3
1397	1	3
1398	1	4
1399	1	4
1400	1	5
1401	1	5
1402	2	6
1403	2	7
1404	2	7
1405	1	7
1406	2	9
1407	6	13
1408	6	14
1409	6	14
1410	6	14
1411	6	14
1412	6	14
1413	6	16
1414	6	16
1415	7	17
1416	9	17
1417	9	18
1418	10	20
1419	10	20
1420	10	23
1421	10	25
1422	10	26
1423	23	29
1424	24	30
1425	25	32
1426	25	34
1427	27	37
1428	28	38
1429	28	39
1430	28	39
1431	30	39
1432	30	39
1433	29	38
1434	29	38
1435	28	37
1436	28	37
1437	28	37
1438	29	37
1439	29	36
1440	29	36
1441	28	36
1442	28	35
1443	27	34
1444	27	34
1445	27	33
1446	27	33
1447	26	29
1448	26	27
1449	25	27
1450	22	26
1451	21	28
1452	21	31
1453	30	38
1454	30	38
1455	30	39
1456	29	33
1457	29	30
1458	26	30
1459	24	29
1460	22	30
1461	22	30
1462	19	28
1463	19	28
1464	19	27
1465	17	26
1466	17	26
1467	17	27
1468	17	26
1469	16	26
1470	16	26
1471	14	26
1472	14	24
1473	14	23
1474	13	22
1475	11	21
1476	11	20
1477	11	19
1478	11	18
1479	9	18
1480	9	18
1481	4	13
1482	4	13
1483	3	13
1484	1	13
1485	1	11
1486	1	9
1487	1	9
1488	1	6
1489	1	4
1490	3	1
1491	3	1
1492	3	1
1493	3	1
1494	3	1
1495	3	1
1496	4	1
1497	4	1
1498	5	1
1499	4	1
1500	4	1
1501	4	1
1502	4	1
1503	4	1
1504	5	1
1505	5	0
1506	5	1
1507	5	1
1508	5	1
1509	5	1
1510	6	2
1511	7	3
1512	8	3
1513	8	3
1514	8	3
1515	8	3
1516	8	3
1517	6	3
1518	6	3
1519	6	3
1520	7	3
1521	7	3
1522	9	4
1523	9	4
1524	9	4
1525	10	4
1526	12	5
1527	12	5
1528	12	5
1529	13	6
1530	12	6
1531	12	8
1532	13	8
1533	14	8
1534	14	8
1535	14	8
1536	14	8
1537	14	8
1538	14	8
1539	13	8
1540	15	9
1541	15	9
1542	14	9
1543	14	9
1544	14	9
1545	14	9
1546	14	9
1547	14	9
1548	14	9
1549	14	9
1550	14	9
1551	14	9
1552	13	8
1553	12	8
1554	12	8
1555	12	7
1556	10	7
1557	7	6
1558	5	5
1559	5	4
1560	4	3
1561	3	3
1562	3	3
1563	3	3
1564	3	3
1565	2	3
1566	2	3
1567	2	3
1568	2	3
1569	2	3
1570	2	3
1571	2	6
1572	2	6
1573	2	6
1574	2	6
1575	2	4
1576	2	4
1577	2	4
1578	2	4
1579	2	4
1580	2	4
1581	2	4
1582	2	4
1583	2	3
1584	2	5
1585	0	5
1586	0	5
1587	0	5
1588	0	5
1589	0	5
1590	0	5
1591	0	5
1592	0	5
1593	0	5
1594	0	5
1595	0	5
1596	0	5
1597	1	5
1598	1	5
1599	1	5
1600	1	5
1601	1	5
1602	1	5
1603	1	5
1604	1	5
1605	1	5
1606	1	5
1607	1	5
1608	1	5
1609	1	5
1610	1	3
1611	1	3
1612	1	3
1613	1	3
1614	1	2
1615	1	2
1616	1	2
1617	1	2
1618	1	2
1619	1	2
1620	1	2
1621	1	2
1622	1	2
1623	1	2
1624	1	0
1625	1	0
1626	1	0
1627	1	0
1628	0	0
1629	0	0
1630	0	1
1631	0	1
1632	0	1
1633	1	1
1634	1	2
1635	1	2
1636	1	3
1637	1	3
1638	1	3
1639	1	3
1640	1	3
1641	1	3
1642	1	3
1643	1	3
1644	2	3
1645	2	3
1646	2	3
1647	2	3
1648	2	3
1649	2	3
1650	2	4
1651	2	4
1652	2	4
1653	3	4
1654	3	5
1655	3	5
1656	3	5
1657	3	7
1658	11	8
1659	12	8
1660	12	11
1661	12	11
1662	13	12
1663	13	12
1664	31	27
1665	31	32
1666	34	33
1667	34	34
1668	34	34
1669	34	34
1670	34	34
1671	36	34
1672	40	34
1673	40	34
1674	40	34
1675	40	34
1676	40	34
1677	40	35
1678	40	35
1679	40	35
1680	40	36
1681	40	37
1682	39	37
1683	43	38
1684	43	38
1685	43	37
1686	42	37
1687	41	38
1688	41	38
1689	37	40
1690	38	40
1691	38	41
1692	34	43
1693	34	44
1694	34	45
1695	31	45
1696	30	44
1697	30	44
1698	33	46
1699	34	46
1700	36	46
1701	36	46
1702	35	45
1703	32	44
1704	32	44
1705	31	44
1706	29	41
1707	29	40
1708	28	37
1709	28	31
1710	28	31
1711	27	30
1712	27	29
1713	26	24
1714	26	22
1715	21	22
1716	21	22
1717	20	22
1718	20	22
1719	20	22
1720	20	22
1721	20	22
1722	20	21
1723	19	21
1724	19	21
1725	18	19
1726	18	18
1727	17	16
1728	16	15
1729	16	14
1730	16	14
1731	16	14
1732	16	12
1733	10	8
1734	10	8
1735	7	7
1736	7	7
1737	7	7
1738	7	6
1739	7	6
1740	7	6
1741	7	5
1742	5	5
1743	3	5
1744	3	5
1745	3	5
1746	3	3
1747	3	2
1748	3	2
1749	2	2
1750	1	1
1751	1	1
1752	1	1
1753	1	1
1754	1	1
1755	1	1
1756	1	1
1757	1	1
1758	1	1
1759	1	1
1760	1	1
1761	1	2
1762	2	2
1763	2	2
1764	5	4
1765	7	5
1766	7	5
1767	9	5
1768	10	6
1769	10	6
1770	10	6
1771	12	6
1772	14	6
1773	14	7
1774	16	10
1775	16	10
1776	16	12
1777	16	12
1778	17	12
1779	22	12
1780	23	12
1781	23	12
1782	23	12
1783	23	12
1784	23	12
1785	23	12
1786	24	13
1787	24	13
1788	24	13
1789	24	13
1790	24	13
1791	24	13
1792	23	13
1793	23	13
1794	23	13
1795	23	13
1796	23	13
1797	22	13
1798	22	13
1799	22	13
1800	22	13
1801	22	13
1802	22	13
1803	18	11
1804	18	11
1805	12	10
1806	11	10
1807	9	5
1808	10	5
1809	10	5
1810	9	5
1811	8	4
1812	6	2
1813	6	1
1814	3	1
1815	2	0
1816	2	1
1817	2	1
1818	2	1
1819	2	1
1820	2	1
1821	2	2
1822	2	3
1823	2	3
1824	2	4
1825	2	4
1826	2	4
1827	2	4
1828	2	4
1829	1	4
1830	2	4
1831	2	4
1832	2	4
1833	2	4
1834	3	4
1835	3	4
1836	3	4
1837	4	4
1838	4	4
1839	4	4
1840	4	4
1841	4	4
1842	4	4
1843	4	5
1844	4	5
1845	3	5
1846	3	5
1847	3	5
1848	3	5
1849	3	5
1850	3	5
1851	3	5
1852	3	5
1853	3	7
1854	3	7
1855	3	7
1856	3	7
1857	3	7
1858	3	7
1859	3	7
1860	3	5
1861	3	5
1862	3	5
1863	3	5
1864	2	4
1865	2	4
1866	2	4
1867	1	4
1868	1	4
1869	1	4
1870	1	4
1871	1	3
1872	1	3
1873	1	3
1874	1	3
1875	1	3
1876	1	3
1877	1	3
1878	1	3
1879	1	3
1880	1	3
1881	1	3
1882	1	3
1883	1	3
1884	1	3
1885	3	3
1886	3	3
1887	3	4
1888	3	4
1889	3	4
1890	3	4
1891	3	2
1892	3	1
1893	3	2
1894	3	2
1895	3	2
1896	3	3
1897	3	4
1898	3	4
1899	3	4
1900	3	4
1901	3	4
1902	4	8
1903	4	9
1904	5	9
1905	5	9
1906	5	9
1907	5	9
1908	5	9
1909	5	9
1910	5	9
1911	5	11
1912	5	12
1913	5	12
1914	6	14
1915	6	14
1916	8	16
1917	8	16
1918	8	16
1919	11	24
1920	12	24
1921	13	30
1922	13	30
1923	13	30
1924	13	30
1925	13	30
1926	15	30
1927	15	31
1928	16	31
1929	16	31
1930	15	31
1931	17	31
1932	22	36
1933	21	34
1934	21	33
1935	21	33
1936	22	33
1937	22	33
1938	23	33
1939	24	32
1940	37	34
1941	38	36
1942	39	35
1943	42	38
1944	43	39
1945	43	39
1946	51	43
1947	51	43
1948	50	43
1949	50	43
1950	50	40
1951	49	38
1952	49	38
1953	49	38
1954	48	38
1955	47	37
1956	46	37
1957	46	34
1958	45	33
1959	43	31
1960	41	29
1961	40	27
1962	39	27
1963	38	27
1964	36	26
1965	36	24
1966	35	23
1967	34	23
1968	32	19
1969	31	19
1970	33	19
1971	27	15
1972	27	15
1973	27	15
1974	27	15
1975	26	15
1976	25	15
1977	16	11
1978	6	4
1979	6	2
1980	5	2
1981	5	2
1982	5	2
1983	5	1
1984	5	1
1985	4	1
1986	2	1
1987	2	1
1988	2	1
1989	2	1
1990	3	0
1991	3	0
1992	3	0
1993	3	0
1994	3	0
1995	1	0
1996	1	0
1997	1	0
1998	1	0
[truncated: 1,441 more rows]
