# Supplementary material for: Dynamic m6A methylation facilitates mRNA triaging to stress granules
Source: Life Sci Alliance. 2018 Jul 3;1(4):e201800113. doi: 10.26508/lsa.201800113 (PMC6238392; doi:10.26508/lsa.201800113)
Supplement: Supplementary file 14 [file LSA-2018-00113_TableS2.xlsx]

## Sheet: Table S2
Table S2 - List of genes translated under mild oxidative stress (200 µM AS).
		Control	growth	Growth	at 200 µM AS	Number	of DRACH	motifs
Gene ID	Gene name	Total reads mRNA (RPKM)	Total RPF reads (RPKM)	Total reads mRNA (RPKM)	Total RPF reads (RPKM)	5' UTR	CDS	3' UTR
ENSG00000026025	VIM	1213.48	2544.23	1253.46	718.83	0	2	0
ENSG00000063177	RPL18	3961.05	3699.15	4149.19	1284.37	0	2	0
ENSG00000074800	ENO1	4585.25	6285.96	4466.78	1455	0	0	0
ENSG00000092841	MYL6	570.463	786.509	622.775	464.66	0	2	0
ENSG00000099800	TIMM13	1094.38	1090.23	1065.98	527.724	0	2	0
ENSG00000100316	RPL3	620.029	1079.95	605.072	501.759	1	2	0
ENSG00000101361	NOP56	668.109	228.333	652.375	138.273	1	2	0
ENSG00000103024	NME3	645.324	421.397	668.663	361.256	0	0	0
ENSG00000103363	TCEB2	780.225	739.432	778.815	279.085	0	1	0
ENSG00000103495	MAZ	983.204	595.253	979.003	345.507	0	3	2
ENSG00000105185	PDCD5	452.096	2296.58	443.916	1480.14	0	0	0
ENSG00000105258	POLR2I	878.611	503.494	882.951	396.588	1	4	0
ENSG00000108518	PFN1	974.958	6247.16	931.9	5812.16	0	1	0
ENSG00000108679	LGALS3BP	335.491	959.038	338.528	392.66	1	5	0
ENSG00000109971	HSPA8	612.882	1726.14	648.413	538.204	0	2	1
ENSG00000111640	GAPDH	1033.85	5809.79	1104.92	1694.83	0	2	1
ENSG00000111669	TPI1	941.051	2312.8	918.156	592.18	0	0	1
ENSG00000111678	C12orf57	421.442	293.751	491.565	180.303	0	0	0
ENSG00000112514	CUTA	302.501	391.563	303.905	288.224	0	0	0
ENSG00000115268	RPS15	391.292	3336.19	472.513	1927.45	0	2	0
ENSG00000122566	HNRNPA2B1	357.499	3288.66	250.001	561.453	0	5	0
ENSG00000125148	MT2A	10.537	148.397	15.8326	250.73	0	0	0
ENSG00000125691	RPL23	2203.52	2523.16	2203.49	1260.52	0	1	0
ENSG00000125901	MRPS26	533.338	509.254	546.327	291.925	0	2	1
ENSG00000125995	ROMO1	822.667	918.868	861.036	749.94	0	0	0
ENSG00000126267	COX6B1	2358.85	3490.33	2290.11	2820.98	0	0	1
ENSG00000128272	ATF4	189.674	136.411	216.154	539.91	1	0	0
ENSG00000128626	MRPS12	706.846	541.433	746.359	349.311	1	1	2
ENSG00000130726	TRIM28	904.665	1253.61	888.597	427.829	0	8	0
ENSG00000131469	RPL27	1837.69	2227.03	1838.48	766.101	0	1	0
ENSG00000132341	RAN	656.946	2757.33	666.79	609.611	0	2	1
ENSG00000132475	H3F3B	385.879	1579.28	376.482	716.471	0	1	0
ENSG00000132507	EIF5A	449.462	3664.59	443.161	1461.89	0	1	0
ENSG00000132646	PCNA	676.287	1436.36	639.077	952.12	0	1	0
ENSG00000133124	IRS4	468.645	551.957	298.563	333.183	0	4	0
ENSG00000140990	NDUFB10	824.089	930.4	783.024	388.491	1	3	0
ENSG00000142676	RPL11	2967.41	3509.78	3156.73	1063.05	0	0	0
ENSG00000142937	RPS8	917.803	2553.67	1097.98	860.47	0	0	0
ENSG00000148303	RPL7A	883.844	1230.67	923.429	550.993	0	2	0
ENSG00000149806	FAU	1338.65	2238.7	1389.32	880.84	1	0	0
ENSG00000149925	ALDOA	1573	3190.55	1621.33	928.586	3	1	0
ENSG00000150991	UBC	289.598	2966.86	337.097	909.511	1	0	0
ENSG00000156508	EEF1A1	12.2322	962.693	20.5714	320.429	1	0	1
ENSG00000161016	RPL8	2502.16	3615.94	2627.92	1699.64	1	0	0
ENSG00000161960	EIF4A1	1129.36	432.935	1153.66	316.974	0	3	1
ENSG00000164032	H2AFZ	429.483	1662.91	477.318	658.59	0	0	0
ENSG00000164104	HMGB2	286.74	862.204	262.524	323.923	1	1	0
ENSG00000164898	C7orf55	59.4586	97.6099	65.4783	36.882	0	0	0
ENSG00000166165	CKB	3524.1	6479.33	3994.99	1495.1	1	3	0
ENSG00000166508	MCM7	1274.72	1270.09	1224.78	505.999	1	5	0
ENSG00000166681	NGFRAP1	412.029	635.715	404.455	280.844	0	0	0
ENSG00000167526	RPL13	1010.52	3821.46	1173.45	1719.01	0	2	1
ENSG00000167552	TUBA1A	49.8965	1178.24	51.9481	313.678	1	2	0
ENSG00000168148	HIST3H3	14.892	82.7664	10.987	99.2278	0	0	0
ENSG00000168242	HIST1H2BI	53.8288	267.583	71.3371	229.132	0	0	0
ENSG00000169564	PCBP1	58.0955	631.041	58.2763	137.136	0	2	0
ENSG00000169710	FASN	239.238	847.898	236.657	288.219	0	21	2
ENSG00000169976	SF3B5	1249.75	1947.65	1380.12	830.17	1	1	2
ENSG00000170043	TRAPPC1	56.0783	434.024	52.8403	336.977	0	1	0
ENSG00000170315	UBB	714.301	3462.57	809.759	1447.66	0	0	0
ENSG00000171858	RPS21	2110.86	2840.45	2186.55	1673.7	0	2	0
ENSG00000172336	POP7	549.066	378.698	568.359	158.276	2	0	2
ENSG00000173113	TRMT112	347.491	847.82	358.278	381.543	1	1	0
ENSG00000175130	MARCKSL1	292.066	1224.09	262.501	685.186	0	0	1
ENSG00000175334	BANF1	67.9053	1219.91	67.894	572.021	1	0	0
ENSG00000175745	NR2F1	23.9551	52.8004	22.1864	23.9232	1	2	3
ENSG00000175756	AURKAIP1	863.929	803.395	864.846	326.008	1	1	0
ENSG00000175792	RUVBL1	428.921	412.658	421.994	101.271	0	4	0
ENSG00000176692	FOXC2	0.53271	101.067	0.400618	368.333	0	6	1
ENSG00000177600	RPLP2	1212.19	2898.76	1318.11	1185.58	0	0	0
ENSG00000177606	JUN	322.869	490.12	550.006	313.696	1	2	1
ENSG00000178952	TUFM	923.875	959.176	981.13	353.328	0	5	0
ENSG00000179010	MRFAP1	291.956	1461.79	284.691	787.157	0	0	2
ENSG00000179029	TMEM107	21.3398	16.1853	18.4423	33.6414	0	0	0
ENSG00000179085	DPM3	152.293	289.49	198.296	141.633	1	0	0
ENSG00000182611	HIST1H2AJ	534.449	753.16	565.531	432.787	0	0	0
ENSG00000183011	LSMD1	369.73	305.496	393.651	189.632	2	0	0
ENSG00000183558	HIST2H2AA3	1047.6	2968.33	1042.74	2074.14	0	0	0
ENSG00000183598	HIST2H3D	351.376	2174.61	365.537	1251.21	0	1	0
ENSG00000184009	ACTG1	1840.73	5788.84	1938.13	3329.48	0	2	1
ENSG00000185112	FAM43A	10.7254	252.298	8.58904	691.406	3	3	0
ENSG00000185787	MORF4L1	31.0055	425.789	24.9713	187.327	0	1	0
ENSG00000187514	PTMA	230.694	1830.95	218.133	509.795	0	1	0
ENSG00000187634	SAMD11	95.4213	41.3912	101.981	25.9127	0	7	0
ENSG00000188229	TUBB4B	477.615	1857.56	547.016	925.739	0	0	0
ENSG00000188290	HES4	917.658	404.652	933.596	274.182	0	2	0
ENSG00000188620	HMX3	7.38834	492.583	5.34804	2185.18	2	0	0
ENSG00000189060	H1F0	48.4707	128.327	33.707	66.224	1	0	0
ENSG00000196226	HIST1H2BB	12.8347	140.759	17.7381	150.458	0	0	0
ENSG00000196230	TUBB	587.885	4110.42	585.068	1363.02	0	2	0
ENSG00000196374	HIST1H2BM	10.4048	111.606	11.4203	80.0585	0	0	0
ENSG00000196532	HIST1H3C	3.28982	531.799	14.6515	303.154	0	0	0
ENSG00000197697	HIST1H2BE	12.399	314.948	26.5191	267.22	0	0	0
ENSG00000198374	HIST1H2AL	206.508	1189	224.305	685.126	0	0	0
ENSG00000198695	MT-ND6	69.733	680.137	36.6097	1891.65	0	0	0
ENSG00000198755	RPL10A	454.272	1343.87	459.827	497.437	0	1	0
ENSG00000204387	C6orf48	261.722	6.23583	276.256	41.6996	0	0	0
ENSG00000204389	HSPA1A	721.843	3270.28	727.267	1037.21	1	2	0
ENSG00000204628	GNB2L1	5450.96	4344.06	5494.74	1658.72	0	0	0
ENSG00000205155	PSENEN	123.409	303.274	129.389	147.391	0	0	1
ENSG00000212907	MT-ND4L	117.823	441.475	98.931	1360.71	0	0	0
ENSG00000228253	MT-ATP8	51.3739	1832.18	19.6354	4316.66	0	0	0
ENSG00000233276	GPX1	204.896	207.517	217.614	212.362	2	1	0
ENSG00000233927	RPS28	5.34589	1562.77	4.21545	1083.66	0	1	3
ENSG00000240972	MIF	1780.88	2867.71	1948.41	1240.01	1	1	1
ENSG00000255302	EID1	16.1181	28.1818	17.2094	27.6776	1	0	1
ENSG00000255823	MTRNR2L8	0.336811	16.013	0.554883	30.3294	1	0	0
ENSG00000256618	MTRNR2L1	0.517115	21.7367	0.760989	70.9919	1	0	0
