# Supplementary material for: Dynamic m6A methylation facilitates mRNA triaging to stress granules
Source: Life Sci Alliance. 2018 Jul 3;1(4):e201800113. doi: 10.26508/lsa.201800113 (PMC6238392; doi:10.26508/lsa.201800113)
Supplement: Supplementary file 15 [file LSA-2018-00113_SdataF13.xlsx]

## Sheet: Figure 3B
Nuclearly encoded genes				Mitochondrial genes (inset)
RD log2 fold change		Median		RD Control	RD 200 µM AS
-3.14015		-2.9		6.11165	5.46087
-2.64517				3.14421	3.39146
-4.1002		Replicates		4.07231	3.62025
-3.46032		2		2.95086	2.16667
-2.77438				4.38253	3.2279
-3.02114				2.95403	2.72769
-3.25215				1.80734	1.94416
-3.41626				3.02319	2.23252
-2.57273				2.66867	2.41565
-3.51905				2.27273	1.77037
-4.10805				5.94685	6.43927
-4.55178				5.33628	5.75
-2.65639
-2.65357
-3.18723
-1.67287
-2.94114
-4.62091
-3.9526
-3.44042
-2.88145
-3.58105
-2.98985
-3.13972
-3.18628
-2.98615
-2.32108
-3.47424
-2.00458
-2.55311
-1.13299
-1.93352
-2.88915
-3.84116
-2.96099
-3.47296
-3.56386
-3.15899
-2.95448
-3.38997
-1.80215
-3.60822
-3.48762
-3.62141
-2.43363
-2.23059
-2.72533
-3.04703
-2.38215
-3.49754
-3.44333
-0.203382
-4.18756
-2.93065
-3.43343
-3.673
-3.74634
-2.99025
-2.01661
-4.31439
-2.94009
-2.05559
-5.6068
-2.83134
-0.881454
-3.07315
-2.982
-2.21535
-3.53539
-4.04197
-3.39676
-2.5609
-2.52742
-3.67743
-3.07819
-2.59956
-1.18854
-0.98624
-2.88239
-3.12272
-3.47311
-2.76355
-1.80896
-3.48481
-3.25605
-2.5957
-3.1001
-3.27339
-3.26842
-2.41889
-2.66966
-2.55462
-1.36168
-2.7214
-2.49058
-0.765977
-2.91031
-3.0565
-3.26663
-2.29084
-2.56102
-1.82026
-1.29649
-2.66213
-3.39382
-0.768979
-2.98579
-3.28448
-2.68929
-4.21883
-3.17236
-2.67535
-2.86918
-3.03562
-0.747153
-2.80032
-1.7371
-4.38164
-3.19168
-3.34722
-2.87548
-2.44384
-3.44602
-3.1912
-2.5852
-2.09718
-2.96514
-2.95386
-3.54465
-3.27099
-3.79899
-1.61244
-3.55953
-2.27426
-2.72625
-2.58563
-1.8664
-3.25482
-2.59391
-2.82311
-4.14528
-1.72945
-3.3901
-3.2416
-1.60228
-2.95496
-3.41559
-1.9968
-2.98714
-3.0492
-2.46642
-1.70008
-3.18689
-2.54242
-3.00652
-3.93295
-2.23149
-2.24845
-2.68131
-0.450418
-2.92711
-2.37631
-2.14967
-2.88383
-3.77222
-3.14363
-1.25852
-0.881454
-4.78834
-0.516733
-2.63895
-2.21271
-3.7225
-2.83784
-2.72433
-4.10147
-3.8092
-2.41026
-1.40001
-2.88837
-3.29649
-2.8354
-3.19908
-1.02441
-2.88171
-3.62358
-2.71014
-2.64819
-1.71375
-3.61732
-3.75154
-2.95053
-2.67089
-2.84506
-2.35614
-2.49384
-1.9784
-0.976611
-3.63918
-1.22541
-3.60392
-2.08953
-3.94891
-2.49045
-2.62376
-3.49894
-2.60896
-2.78859
-3.04628
-3.0617
-2.69138
-2.57638
-2.29229
-3.16423
-2.57499
-3.67153
-3.10655
-4.34957
-2.62754
-3.97747
-3.65902
-3.41298
-3.49126
-2.11679
-2.74955
-3.43566
-3.5454
-2.72024
-3.24518
-3.35863
-2.66693
-3.15709
-3.07124
-4.05176
-3.51593
-2.50906
-1.45239
-3.58676
-0.729451
-2.88925
-3.39634
-2.66716
-2.88403
-3.7247
-3.19735
-2.7087
-2.08842
-3.80256
-3.33829
-5.69083
-2.13888
-3.30918
-1.83285
-3.48154
-3.38597
-2.36832
-3.55966
-3.22136
-2.35094
-3.48878
-2.98407
-3.47432
-1.94247
-3.51676
-3.1874
-3.75424
-3.30974
-1.67089
-2.34089
-3.43585
-2.77089
-3.78226
-1.63634
-2.14914
-2.47118
-2.69732
-0.113184
-3.97851
-3.21961
-1.24241
-1.97184
-4.06793
-2.34256
-3.62345
-3.10268
-2.81334
-3.33412
-3.39224
-2.25454
-3.05138
-3.61155
-3.22888
-0.984686
-3.01841
-2.85846
-1.67587
-4.80429
-3.42831
-2.88145
-3.06163
-2.97302
-2.93553
-4.06743
-3.09881
-1.74098
-3.59855
-3.82031
-2.99346
-2.38303
-1.72172
-2.11241
-4.22647
-3.44404
-3.60127
-3.44404
-4.09799
-3.53818
-2.55953
-2.53115
-3.63316
-2.05409
-3.75109
-3.86309
0.440474
1.40395
-2.64044
-2.59274
-3.18332
-3.01896
-3.81536
-2.5538
-3.62913
-2.09555
-1.73706
-2.52531
-2.77133
-2.76707
-2.90892
-2.88499
-3.80608
-3.75735
-1.17431
-2.98725
-2.34015
-2.24115
-1.25727
-2.48202
-0.0709315
-3.63339
-2.15151
-3.65419
-4.11964
-4.72515
-2.32902
-2.20955
-3.78146
-1.91342
-1.78013
-2.86502
-2.91513
-3.84633
-3.38429
-3.45342
-3.90655
-3.25411
-2.4087
-3.61522
-3.15794
-4.66281
-3.76322
-3.65163
-2.88015
-2.37222
-3.11567
-2.6961
-2.72959
-4.0389
-3.63141
-3.28079
-3.12257
-6.33349
-3.07343
-2.62169
-3.26565
-2.91851
-2.47315
-3.5515
-2.98276
-3.80012
-3.9815
-3.83316
-3.22575
-3.38111
-2.72462
-3.34236
-2.22204
-2.67792
-2.73937
-2.96577
-3.38753
-3.91729
-3.46412
-2.54713
-3.57782
-1.95851
-3.80202
-2.80682
-3.66358
-3.42253
-2.62962
-3.00143
-2.90516
-0.493051
-3.53218
-2.38721
-1.85762
-3.49473
-3.31099
-1.37425
-2.34519
-3.23852
-4.37622
-2.98328
-2.20338
-2.9127
-2.39232
-4.00497
-2.44115
-1.82655
-3.77686
-3.40804
-2.36688
-3.0914
-2.09512
-2.26511
-2.02554
-2.29649
-4.00134
-3.22743
-1.66464
-2.61482
-2.2279
-4.24769
-3.44072
-2.79612
-3.27532
-2.69825
-3.11027
-3.82581
-2.59912
-2.42172
-4.99429
-2.50145
-3.00268
0.533584
-3.10008
-3.8853
-2.86538
-2.82343
-1.80122
-3.24023
-3.39968
-3.43861
-2.63148
-3.46935
-2.67882
-2.28259
-2.58561
-3.82239
-3.90588
-3.11397
-4.73377
-2.66728
-2.48455
-2.26688
-3.99222
-2.68881
-2.39603
-3.54053
-2.70042
-1.99693
-3.2851
-2.84745
-2.08841
-3.99985
-3.84744
-2.9971
-4.09882
-3.3797
-3.22346
-2.16583
-2.14007
-2.99842
-1.9704
-3.57015
-2.92377
-3.94782
-3.88353
-4.28644
-2.37856
-3.33862
-3.28472
-1.12538
-2.62907
-1.7204
-3.47333
-2.15664
-3.08683
-3.02404
-2.84493
-3.18524
-3.60144
-4.16775
-2.12938
-2.32027
-2.18465
-2.84441
-2.04928
-3.73461
-2.81659
-3.72081
-1.51888
-3.05078
-1.64207
-3.05859
-2.39603
-4.16114
-2.67925
-3.73581
-2.6365
-3.49809
-3.79505
-2.06569
-3.62013
-2.77654
-3.34151
-3.06017
-4.10836
-3.11938
-1.47123
-3.37003
-2.77098
0.074957
-2.8064
-3.45392
-3.81738
-1.83083
-2.08111
-2.6959
-3.34943
-2.62411
-3.18649
-2.93792
-2.86957
-1.51504
-2.19509
-2.96552
-3.04094
-3.21837
-2.7408
-1.52268
-2.0467
-2.5586
-2.64574
-2.54898
-2.3993
-3.40456
-1.52137
-2.60937
-4.41527
-3.27085
-3.56764
-4.73704
-3.47869
-4.17393
-2.2241
-1.8958
-3.09944
-3.01074
-3.23831
-2.33803
-3.63963
-2.95834
-3.86165
-1.65116
-2.73372
-3.16156
-3.27116
-2.69822
-2.99486
-3.08663
-4.20338
-4.01112
-3.39983
-2.87708
-2.55403
-3.26902
-3.26688
-2.85489
-3.91708
-3.86339
-2.99913
-2.78834
-2.1758
-3.25591
-2.10069
-3.22879
-3.33283
-2.77588
-2.655
-3.20764
-0.643294
-2.81904
-3.6002
-0.747339
-3.06602
-4.28745
-3.71363
-2.96892
-2.36688
-2.66335
-3.744
-1.63634
-2.40381
-3.55542
-2.52121
-4.34896
-2.77242
-3.29186
-3.09369
-2.18515
-2.90954
-3.35764
-2.64775
-1.68622
-1.64699
-4.06256
-3.22561
-3.63763
-3.21368
-2.25997
-2.88969
-3.03861
-2.97798
-3.3595
-4.75894
-0.595336
-3.24866
-2.71079
-2.76134
-3.49492
-3.45883
-3.41887
-2.33572
4.28847
-1.74241
-2.45268
-3.55157
-2.5616
-2.85157
-3.72647
-3.54104
-2.53789
-0.72068
-3.6104
-3.75103
-4.6413
-2.42061
-3.19588
-3.14019
-2.60243
-1.65197
-3.79418
-2.86679
-3.05896
-3.09171
-1.40306
-2.86825
-3.14602
-2.33343
-3.72997
-3.24457
-3.24043
-3.21839
-2.07681
-3.00493
-4.06343
-3.62235
-3.72067
-2.44117
-2.18958
-3.40779
-3.51085
-4.01586
-2.60712
-2.36314
-3.2171
-2.13136
-2.76664
-3.50916
-3.55446
-2.54786
-2.94042
-2.31497
-3.14842
-3.81475
-4.14452
-3.26796
-3.41794
-3.86105
-3.41526
-3.20207
-3.08132
-4.68881
-2.29022
-2.60135
-4.23499
-2.03832
-2.5488
-2.68063
-2.54908
-1.19099
-1.87407
-3.97634
-3.00106
-3.36266
-1.65624
-3.19106
-3.02163
-1.90252
-4.36608
-2.88493
-0.980989
-1.65164
-2.55833
-3.97464
-2.83278
-2.5726
-3.05081
-2.32341
-4.38925
-3.22019
-0.954896
-3.70888
-3.89415
-2.59752
-3.8325
-3.43676
-4.512
-2.27377
-3.88585
-1.97545
-3.6201
-2.29875
-3.98426
-2.60627
-3.38138
-4.48081
-2.76443
-2.95415
-2.81038
-2.78575
-2.43265
-2.59053
-3.19131
-1.77375
-2.46801
-2.9392
-2.52176
-3.58617
-2.78444
-1.95215
-2.99252
-2.77031
-2.70415
-2.94097
-2.98041
-2.97508
-3.66419
-2.30233
0.311191
-2.79167
-1.32812
-3.82648
-2.88838
-2.89054
-3.51081
-2.85704
-2.39018
-3.18248
-3.57939
-3.15221
-2.67714
-3.07761
-3.54334
-2.596
-0.926098
-1.85997
-3.21936
-2.85179
-2.73614
-4.1607
-2.92585
-3.7553
-2.04337
-2.25997
-2.70727
-2.49106
-2.2048
-2.30354
-3.49431
-3.20262
-2.38549
-3.65147
-1.99083
-3.36394
-3.00248
-4.05835
-3.59879
-2.23956
-3.00356
-2.45212
-3.0854
-2.34485
-2.58365
-2.29844
-3.56278
-3.31629
-0.881454
-2.72655
-3.38395
-2.09956
-3.72047
-0.454921
-3.53861
-1.91056
-3.01698
-3.23273
-3.36922
-3.96939
-3.50538
-2.77287
-2.10687
-1.65906
1.28847
-3.00953
-3.2482
-3.87699
-2.9184
-4.98916
-2.72949
-2.18262
-3.52963
-4.19544
-2.52197
-2.28037
-3.01817
-4.51548
-3.26727
-3.14037
-2.51697
-2.20789
-2.70792
-2.69312
-4.12141
-3.38989
-0.781918
-2.63524
-3.39474
-2.78689
-3.06636
-2.82956
-2.39541
-2.12552
-2.5391
-2.38555
-3.78821
-3.19036
-4.70099
-2.21849
-3.4131
-3.395
-0.596362
-3.98937
-2.92966
-4.94945
-3.59458
-3.94558
-2.35636
-3.27218
-3.58953
-3.30916
-1.8607
-4.03957
-3.77747
-2.3657
-3.18462
-1.66834
-3.27132
-1.37456
-2.80272
-3.01309
-3.72666
-3.03379
-3.79114
-3.43358
-2.93737
-3.96445
-3.27702
-3.13775
-4.11044
-3.08975
-3.08948
-2.2213
-2.67279
-3.11909
-2.4707
-4.61829
-1.30276
-3.8373
-1.64922
-2.08756
-3.58838
-1.79821
-3.05138
-0.10773
-2.4726
-2.63459
-3.39112
-3.06109
-3.16917
-2.34951
-3.22236
-2.70268
-3.17143
-3.30216
-3.64008
-3.73591
-2.85616
-3.03297
-3.07481
-4.25256
-2.999
-3.00658
-2.86596
-4.08369
-0.833432
-2.71198
-4.14326
-2.21278
-3.5955
-3.10716
-2.40312
-3.50646
-3.43771
-3.2667
-0.984991
-2.42882
-1.36688
-3.51083
-1.65153
-3.40374
-3.11474
-3.30595
0.810424
-2.00503
-3.03446
-3.87476
-3.81183
-2.92585
-1.99249
-3.24402
-1.46642
-1.98837
-3.30552
-3.255
-1.48763
-2.61171
-3.28299
-2.53353
-3.53426
-1.72276
-2.81106
-3.14758
-2.50097
-3.28545
-2.7724
-1.70637
-2.50342
1.11855
-2.45748
-2.99643
-1.57438
-2.79139
-1.14893
-3.15753
-3.3096
-1.92634
-4.11946
-2.90075
-1.39906
-2.91438
-1.73626
-2.73011
-2.8236
-3.15789
-3.06823
-3.22932
-3.57466
-3.80397
-2.57039
-3.78553
-3.76333
-2.9665
-2.14983
-2.65844
-1.05138
-1.97389
-2.25997
-3.07778
-3.19153
-2.09017
-2.50555
-4.32891
-3.75717
-3.63089
-3.31807
-3.05709
-2.31241
-2.33918
-3.33102
-3.70449
-2.46642
-2.31441
-2.72312
-2.84581
-4.02565
-2.51665
-0.755923
-2.55876
-2.65755
-3.45197
-3.25741
-3.14143
-2.46181
-5.23901
-2.53781
-2.86334
-3.42818
-2.72829
-2.29649
-2.7933
-2.60398
-2.30813
-3.21641
-2.62042
-3.64943
-1.671
-3.01722
-3.60392
-2.20832
-3.14492
-3.28079
-3.83234
-2.26228
-3.08545
-3.68881
-3.35081
-3.99298
-3.80947
-3.74266
-2.20338
-2.64144
-4.50135
-2.82711
-3.28956
-2.80284
-2.95729
-2.93274
-4.27248
-2.7014
-3.3616
-1.10385
-2.9189
-3.71364
-3.14695
-2.79501
0.237749
-3.69905
-3.28188
-1.04449
-3.75285
-3.01818
-2.24402
-2.97088
-2.74537
-2.88717
-3.85043
-3.99547
-3.0337
-1.32203
-4.56851
-1.93392
-2.65514
-3.81024
-1.98837
-2.85753
-2.68952
-3.13276
-3.56188
-2.43687
-2.39444
-2.31907
-1.97159
-3.85435
-4.96543
-1.2447
1.70351
-2.61086
-3.13947
-3.7038
-4.40766
-2.99172
-1.88828
-2.86908
-3.64569
-3.65404
-3.89303
-4.15174
-3.86441
-0.530547
-0.881454
-3.86331
-3.35654
-5.17239
-3.74307
-3.91589
-3.65591
-3.21609
-4.12979
-2.43119
-4.12953
-3.47011
-1.04856
-2.49489
-1.76464
-3.25903
-3.5063
-1.71153
-3.32336
-3.16167
-4.04045
-3.68146
-3.60117
-2.50878
-0.765977
-2.67831
-2.94458
-3.58938
0.440474
-2.3702
-2.71631
-0.659061
-3.2705
-2.45903
-2.53111
-3.42061
-2.33146
-4.48914
-2.76036
-1.66438
-3.3899
-3.08513
-2.82458
-2.56467
-2.24634
-2.58851
-4.32101
-2.88919
-3.62971
-1.7676
-3.45192
-3.96239
-2.66918
-2.04891
-1.91514
-3.52531
-3.0183
-4.94668
-3.52519
-2.91577
-3.2477
-1.93798
-2.53854
-3.94713
-1.77657
-2.63436
-2.56748
-0.366881
-2.68725
-2.29357
-3.95302
-1.92135
-2.99117
-2.33943
-2.16839
-1.80483
-1.89497
-2.34194
-3.75928
-1.40146
-3.31901
-4.52708
-3.46184
-2.5172
-3.13541
-3.46642
-3.30316
-2.78819
-2.97294
-2.76973
-1.64699
-3.47176
-2.80289
-3.63384
-0.788344
-3.15383
-3.61944
-2.43757
-3.60272
-3.12092
-2.03174
-2.65812
-1.94788
-2.7223
-1.73647
-2.07147
-1.87407
-3.50117
-3.58006
-1.5865
-2.7643
-4.20028
-3.15663
-3.77164
-3.01729
-3.12085
-2.97206
-2.78422
-3.38597
-4.14711
-2.08643
-2.63206
-4.32406
-4.17404
-1.97755
-2.84165
-3.84475
-3.09105
-3.87092
-3.63496
-3.17149
-2.88788
-2.78519
-1.50706
-3.37574
-3.17481
-2.8213
-2.74132
-3.73621
1.70351
-3.27413
-3.933
-3.40943
-3.27554
-5.41229
-3.62777
-3.39626
-3.82967
-3.00581
-2.00822
-1.45471
-2.36062
-2.4344
-2.74199
-2.42738
-3.40173
-3.40597
-2.62247
-2.36532
-3.99567
-3.00558
0.653878
-2.92392
-2.68201
-0.28055
-3.42894
-2.95408
-2.75832
-3.52871
-3.57413
-3.52095
-3.24629
-3.9685
-3.73227
-2.4215
-2.39956
-2.69234
-2.34906
-3.15478
-3.95799
-2.09596
-3.206
-1.52365
-2.88508
-3.49147
-3.24447
-2.50335
-2.13007
-3.22838
-3.8978
-3.10977
-1.66214
-3.67513
-4.74824
-3.59203
-2.80288
-2.89089
-3.509
-2.31346
-1.88145
-3.10411
-3.17552
-2.18534
-3.76128
-2.00313
-3.49702
-0.948573
-2.39366
-2.5904
-3.03135
-3.42809
-3.22126
-2.6093
-3.30392
-2.6262
-1.56078
-2.71561
-4.09134
-3.00629
-4.5051
-2.56541
-2.54442
-3.10065
-1.79182
-4.11948
-3.38339
-3.33792
-3.35501
-3.73695
-3.56487
-2.49066
-3.41264
-3.34478
-4.49059
-3.5691
-2.41345
-3.04133
-3.3431
-4.46457
-2.49212
-3.25997
-2.5148
-4.30237
-3.94585
-2.45274
-2.83674
-3.75785
-3.77084
-2.55304
-2.91921
-4.11913
-3.51484
-3.36833
-3.30495
-2.36242
-2.74095
-3.10949
-1.59356
-3.88517
-2.0879
-3.51081
-1.86289
-3.40934
-2.7405
-3.33266
-2.61264
-3.43236
-2.58525
-2.81482
-2.77308
-0.236934
-3.41099
-2.04686
-3.76277
-2.68995
-2.65055
-3.05778
-3.54578
-2.27393
-2.58896
-3.46054
-3.34811
-3.20596
-4.01821
-1.87351
-2.7544
-2.26275
-3.68881
-2.06227
-2.89823
-3.11707
-2.94842
-1.62688
-2.62741
-3.53954
-3.78192
-2.89597
-3.35897
-2.31682
-3.30325
-2.96238
-3.39049
-3.95862
-3.34164
-2.63723
-3.60557
-3.10385
-2.48792
-2.98187
-3.34494
-1.89866
-3.46216
-1.59195
-2.24707
-1.46642
-0.203382
-3.74592
-2.48622
-1.83951
-2.06064
-2.61521
-3.15527
-3.75626
-3.56555
-2.98406
-2.39103
-0.638477
-3.97931
-2.60304
-3.3802
-3.57657
-3.15648
-3.40944
-3.6024
-1.62121
-3.6236
-2.3539
-2.49875
-2.73759
-1.40188
-2.48746
-3.40064
-1.86279
-3.52921
-2.62134
-2.91158
-2.47099
-3.98696
-3.01847
-3.46953
-3.58124
-3.26686
-2.52666
-1.89037
-2.47739
-2.60351
-2.06252
-4.22786
-3.20228
-3.64225
-3.05138
-3.47618
-3.40151
-3.51056
-2.88145
-3.67232
-2.75961
-3.92197
-1.05138
-2.91195
-2.80082
-2.95756
-3.35799
-2.99289
-3.52489
-2.45386
-3.30967
-1.68881
-3.0166
-2.85141
-1.67768
-3.52018
-1.68881
-2.81517
-1.80745
-2.41825
-3.9034
-5.11543
-0.377411
-2.75294
-3.20382
-3.42009
-4.68894
-4.22574
-2.49479
-2.36389
-3.02587
-4.06724
-2.91379
-3.0062
-2.04841
-2.22205
-3.44931
-3.29496
-4.37104
-3.45587
-1.60392
-3.70489
-3.18096
-2.66284
-2.72945
-3.10243
-2.41911
1.60397
-3.19813
-3.668
-1.88145
-2.04973
-3.65508
-3.2374
-2.91075
-2.86264
-3.30929
-3.07976
-2.77743
-3.09592
-3.51446
-2.25093
-3.00911
-3.36202
-2.9538
-1.84222
-3.39067
-2.92653
-3.6273
-3.21292
-4.21903
-3.54598
-3.79059
-2.79976
-3.03918
-3.56595
-3.32062
-1.48349
-2.30136
-2.82569
-1.05138
-2.97441
-1.89753
-4.11944
-2.79602
-4.6814
-1.74594
-3.02918
-2.39211
-3.36528
-2.28046
-3.40257
-1.02504
-3.65977
-3.23454
-3.16046
-3.18992
-3.19148
-3.96594
-4.21432
-3.56213
-2.82615
-3.79656
-2.42846
-2.72201
-3.72773
-3.10692
-2.29771
-4.12263
-3.61795
-3.59571
-2.1803
-3.97512
-4.13278
-2.91104
-2.77715
-2.80979
-3.86136
-2.69026
-1.88145
-3.33968
-3.78417
-1.98426
-2.51363
-2.15176
-2.24078
-2.32903
-0.466416
-1.87081
-3.57034
-1.69303
-2.99693
-1.74984
-2.74379
-0.396027
-3.41854
-3.30028
-3.08361
-3.59443
-1.69112
-2.79922
-3.84222
-2.85222
-3.59772
-4.37126
-1.98279
-2.7468
-3.58049
-1.20338
-6.23195
0.262936
-2.0924
-3.51958
-3.80255
-3.50793
-3.50378
-3.6105
-3.9943
-1.07563
-3.05882
-3.53024
-3.10678
-3.27811
-2.87378
-2.52067
-4.87904
-2.7797
-3.27633
-0.618419
-2.45465
-3.23891
-1.55953
-3.50478
-2.33101
-1.71285
-3.22519
-1.00698
-3.34837
-3.75142
-4.06937
-2.88145
-3.0059
-2.6045
-3.41836
-3.17337
0.324997
-3.29694
-1.8089
-3.32624
-2.81345
-3.11962
-2.15306
-3.24022
-2.31321
-2.69523
-2.52205
-3.0988
-3.33858
-2.57504
-3.09886
-3.6258
-3.50439
-3.10303
-2.86916
-3.36863
-1.94297
-3.6964
-2.66798
-2.30638
-3.38829
-3.34356
-2.95047
-2.2577
-2.27021
-3.61431
-2.56027
-2.66014
-3.78541
-2.89996
-3.55793
-3.65763
-3.34092
-3.21904
-3.09545
-1.75614
-2.07347
-3.09998
-3.79876
-1.90793
-2.9239
-2.77285
-2.91031
-4.0193
-2.25377
-3.46642
-2.20338
-3.61528
-2.68687
-3.13705
-3.04562
-3.60601
-3.00883
-1.85387
-3.63497
-1.81636
-2.20338
-2.96954
-3.45032
-2.96327
-3.78213
-3.29106
-3.10192
-2.41787
-2.10543
-2.68094
-3.12365
-1.05138
-3.58095
-3.2731
-3.31304
-3.36764
-1.92363
-2.98766
-2.73301
-2.63012
-3.5215
-3.2636
-3.0429
-3.62766
-3.18744
-1.85694
-2.92943
-3.48562
-2.91349
-2.72687
-3.31471
-3.34439
-2.56793
-3.24059
-3.96011
-3.4057
-2.22342
-1.92958
-1.43247
-3.21403
-2.27114
-3.61612
-2.38011
-3.33897
-3.98419
-3.95646
-2.87485
-1.58743
-1.84895
-1.91261
-3.20444
-2.51213
-4.02078
-1.88735
-2.94713
-4.06849
-2.4769
-1.93477
-3.36911
-4.21391
-2.60677
-4.77433
-3.31441
-2.53977
-3.06968
-2.2891
-2.46642
-3.31345
-1.21792
-1.88145
-2.61592
-1.66281
-4.00204
-3.48675
-3.19665
-3.26228
-3.39905
-2.70128
-3.161
-2.39172
-2.51754
-2.56072
-3.30403
-3.41445
-3.82631
-2.9949
-3.55316
-1.14449
-2.63899
-2.75154
-3.11178
-3.33411
-3.46939
-1.47907
-2.10803
-3.44561
-2.92585
-2.67667
-3.6959
-2.82168
-1.02985
-3.38037
-3.30179
-3.27256
-1.02985
-2.75578
-3.61733
-2.76426
-2.93344
-2.94503
-5.10687
-3.56622
-2.1879
-3.27708
-2.76048
-1.64275
-2.81152
-3.07063
-3.24097
-2.55026
-3.8875
-2.46605
-2.6426
-3.77302
-1.74614
-3.37117
-3.44315
-1.42577
-3.55706
-3.26016
-2.95954
-2.62068
-2.75842
-1.07685
-3.13431
-2.04531
-3.56346
-3.16926
-4.19241
-2.13516
-4.10385
-4.00576
0.225461
-3.67386
-3.16199
-2.49031
-2.84942
-3.39448
-3.43396
-3.14631
-3.2667
-3.36978
-3.78625
-3.25823
-2.16746
-2.42269
-3.31592
-3.38554
-3.65564
-1.17645
-2.06651
-3.32008
-2.78801
-3.52871
-3.6278
-3.5526
-4.10816
-3.26139
-2.29649
-2.81932
-3.01197
-2.96044
-2.85212
-4.30152
-1.20338
-3.37352
-2.96146
-3.60498
-3.40586
-5.05548
-1.0879
-2.80552
-3.78133
-3.44984
-2.77485
-2.76305
-2.7278
-1.15829
-2.95264
-3.17996
-3.70705
-3.93456
-3.44364
-3.85805
-3.42208
-2.7889
-2.08268
-2.98806
-2.19538
-3.54949
-3.12583
-2.79116
-3.09247
-3.53564
-3.28576
-3.17645
-4.31921
-2.58291
-3.56806
-1.29394
-2.05687
-4.23619
-3.59903
-2.98148
-4.29931
-2.36033
-2.94512
-3.2937
-4.21606
-2.75214
-4.13457
-1.46498
-3.54442
-2.3635
-0.905158
-4.49428
-2.87854
-2.75578
-3.8388
-3.44797
-3.17527
-2.88145
-3.25955
-3.36565
-2.39603
-1.90793
-2.80505
-2.76734
-2.292
-3.09411
-2.42412
-2.91946
-3.30254
-3.99985
-2.08076
-2.96055
-2.69922
-2.62984
-3.66668
-2.90028
-3.30539
-3.65455
-3.18295
-2.63424
-2.45353
-3.74207
[truncated: 10,130 more rows]
