# Supplementary material for: Dynamic m6A methylation facilitates mRNA triaging to stress granules
Source: Life Sci Alliance. 2018 Jul 3;1(4):e201800113. doi: 10.26508/lsa.201800113 (PMC6238392; doi:10.26508/lsa.201800113)
Supplement: Supplementary file 16 [file LSA-2018-00113_SdataF14.xlsx]

## Sheet: Figure 3C
Cumulative metagene profile, 200 µM AS
mRNA [norm.mean reads]	RPF [norm.mean reads]
0.610384	3.83049		Replicates	2
0.613307	3.89838
0.609754	3.90183
0.605391	3.90859
0.601828	3.92747
0.59997	3.95802
0.600857	3.99303
0.601615	4.033
0.604307	4.07877
0.603172	4.12958
0.605278	4.22672
0.605144	4.32836
0.603564	4.43566
0.602237	4.54546
0.60753	4.65933
0.614864	4.77434
0.624522	4.88995
0.634875	5.00726
0.63553	5.11951
0.639561	5.23262
0.644596	5.34694
0.650492	5.45736
0.662216	5.60643
0.675047	5.75373
0.687994	5.89507
0.699842	6.02496
0.709722	6.15071
0.722469	6.274
0.736088	6.39163
0.752182	6.50099
0.766664	6.61101
0.783886	6.71652
0.801623	6.8154
0.820209	6.91163
0.827598	7.00182
0.832716	7.08731
0.843577	7.1647
0.857759	7.2355
0.876918	7.29785
0.897219	7.35056
0.913681	7.3961
0.929193	7.44333
0.941538	7.49107
0.952807	7.54518
0.965246	7.59873
0.976437	7.655
0.987166	7.70933
0.995228	7.76587
1.00189	7.87531
1.00808	7.99703
1.01539	8.11875
1.016	8.25726
1.01669	8.39918
1.01456	8.5464
1.02191	8.70911
1.02672	8.8805
1.02518	9.06535
1.01782	9.25918
1.00814	9.46244
0.997524	9.67506
0.988149	9.89536
0.979703	10.1168
0.973861	10.3448
0.962273	10.5711
0.947604	10.8146
0.935505	11.079
0.925222	11.3453
0.913945	11.6078
0.903013	11.8218
0.893442	12.022
0.883306	12.1934
0.87661	12.3111
0.868552	12.4239
0.863227	12.5298
0.852572	12.6211
0.845479	12.7059
0.840287	12.7819
0.839701	12.8511
0.843601	12.9102
0.849642	12.9574
0.856703	12.9937
0.862494	13.019
0.862981	13.0312
0.871062	13.0337
0.879786	13.0114
0.888198	12.9621
0.894102	12.9058
0.89998	12.8352
0.903842	12.7499
0.909317	12.6589
0.914907	12.5827
0.922161	12.534
0.932572	12.4783
0.942592	12.4065
0.953407	12.3221
0.963503	12.2264
0.974193	12.1229
0.982443	12.0158
0.991407	11.9098
1.0001	11.8051
1.01053	11.6991
1.02184	11.5991
1.03855	11.4991
1.05103	11.4035
1.06404	11.3125
1.0752	11.2254
1.08506	11.1434
1.09753	11.072
1.11021	11.0136
1.12153	10.9586
1.13163	10.9054
1.14478	10.8536
1.1596	10.8034
1.17382	10.7631
1.19299	10.7331
1.21491	10.7083
1.23146	10.6898
1.25002	10.6755
1.26589	10.6581
1.27678	10.6406
1.2868	10.6237
1.29642	10.6067
1.30611	10.5917
1.31665	10.5805
1.32668	10.5713
1.33684	10.5593
1.34802	10.5404
1.35611	10.5175
1.37029	10.4823
1.38878	10.443
1.41454	10.4035
1.43417	10.3608
1.45086	10.3179
1.4679	10.2736
1.47862	10.2242
1.48582	10.1763
1.49625	10.1181
1.5035	10.0527
1.50959	9.9847
1.51974	9.91466
1.52641	9.86024
1.53708	9.80372
1.54682	9.74341
1.55884	9.676
1.56777	9.6011
1.58006	9.52195
1.5914	9.44596
1.60215	9.37125
1.60671	9.30161
1.60239	9.23694
1.59066	9.17431
1.58327	9.11746
1.57412	9.06007
1.56556	9.00105
1.56078	8.93993
1.55157	8.87759
1.54405	8.8196
1.54113	8.76308
1.52935	8.70905
1.51515	8.65726
1.50236	8.59441
1.48604	8.53365
1.46632	8.47556
1.44899	8.41584
1.44478	8.35911
1.43708	8.30829
1.43321	8.25569
1.429	8.20286
1.42117	8.15038
1.41661	8.09635
1.41671	8.04196
1.41255	7.98506
1.41235	7.92579
1.41197	7.8644
1.40534	7.80555
1.40587	7.74442
1.40169	7.68644
1.38891	7.62708
1.38865	7.57134
1.38806	7.51568
1.38209	7.45491
1.37793	7.39016
1.3774	7.32367
1.37375	7.25847
1.3603	7.19357
1.34846	7.12925
1.33299	7.07201
1.32384	7.01839
1.31887	6.96422
1.31582	6.91163
1.30972	6.85822
1.3072	6.80476
1.30899	6.75693
1.30727	6.71621
1.31332	6.67758
1.31889	6.6422
1.32988	6.60499
1.34781	6.57334
1.35868	6.54005
1.37198	6.50674
1.39003	6.47714
1.40461	6.44925
1.41576	6.42367
1.42744	6.40205
1.4392	6.38528
1.44731	6.37146
1.4552	6.35724
1.45977	6.34087
1.46595	6.3254
1.47142	6.31113
1.47545	6.29897
1.47702	6.29142
1.46844	6.28445
1.46294	6.27614
1.4567	6.27043
1.44864	6.26635
1.42799	6.2698
1.40059	6.26961
1.37132	6.27154
1.33941	6.27562
1.30607	6.28229
1.27638	6.28947
1.24341	6.29969
1.21688	6.31061
1.1913	6.31927
1.16817	6.32444
1.14659	6.3286
1.12662	6.33295
1.10473	6.33327
1.08791	6.33078
1.07261	6.32791
1.06012	6.32629
1.05095	6.32101
1.04992	6.31567
1.04461	6.30694
1.03863	6.29643
1.03823	6.27663
1.04393	6.25574
1.05521	6.23276
1.06913	6.20803
1.08695	6.17765
1.10512	6.14554
1.12885	6.11159
1.14915	6.07475
1.17005	6.03575
1.19063	5.99592
1.20583	5.95219
1.21901	5.90812
1.23574	5.86509
1.24645	5.82416
1.25779	5.78232
1.2646	5.73529
1.276	5.69138
1.28377	5.64931
1.29189	5.60946
1.303	5.57038
1.31863	5.53229
1.32968	5.49697
1.33524	5.46292
1.34077	5.43065
1.34763	5.39855
1.34836	5.37098
1.34915	5.34225
1.34432	5.31373
1.34011	5.2862
1.33607	5.26019
1.33416	5.23688
1.33154	5.21369
1.32642	5.19255
1.32599	5.17044
1.32307	5.14978
1.32408	5.1318
1.32527	5.1129
1.3192	5.0906
1.30973	5.06999
1.29663	5.04865
1.28801	5.02942
1.2841	5.01097
1.28142	4.99268
1.2683	4.97737
1.25203	4.96209
1.23735	4.94291
1.22203	4.9266
1.2091	4.91256
1.19466	4.89962
1.17725	4.88868
1.16135	4.88198
1.14475	4.87611
1.1262	4.87277
1.10891	4.877
1.09291	4.88244
1.07628	4.88708
1.05895	4.89069
1.04228	4.89791
1.02876	4.90455
1.01857	4.91019
1.00363	4.91345
0.989263	4.91724
0.977215	4.98513
0.97123	5.51603
0.966013	5.51491
0.969006	5.51285
0.978795	5.50987
0.988715	5.50422
1.0024	5.49623
1.02301	5.48653
1.04481	5.47535
1.0703	5.46304
1.09747	5.44981
1.12038	5.43596
1.14454	5.42161
1.17342	5.40692
1.19963	5.39196
1.22947	5.37681
1.26047	5.36144
1.28792	5.34594
1.31682	5.33033
1.34658	5.31463
1.37959	5.29883
1.41523	5.28289
1.44814	5.26677
1.47401	5.25047
1.49161	5.23405
1.51484	5.21873
1.53591	5.20744
1.5547	5.19495
1.57303	5.18119
1.58556	5.16606
1.59753	5.14961
1.608	5.13183
1.61497	5.11277
1.60582	5.09249
1.59021	5.07101
1.56172	5.04844
1.53133	5.02483
1.50217	5.00006
1.47482	4.97397
1.44163	4.94642
1.40468	4.91742
1.36485	4.88701
1.33128	4.85524
1.29785	4.82213
1.26667	4.78776
1.23077	4.75342
1.19661	4.71917
1.15772	4.68501
1.11993	4.65087
1.08423	4.61673
1.04491	4.58252
1.0037	4.54819
0.968709	4.51376
0.94681	4.47921
0.933852	4.44461
0.931221	4.41107
0.930462	4.37861
0.931207	4.3471
0.933345	4.31658
0.938988	4.28697
0.946946	4.2583
0.959658	4.23048
0.971839	4.20347
0.9803	4.17725
0.990637	4.15177
1.00573	4.12698
1.01848	4.10283
1.03606	4.07931
1.0525	4.0564
1.06897	4.03414
1.08907	4.01259
1.11173	3.99178
1.12764	3.97169
1.14217	3.95235
1.15273	3.93366
1.16619	3.9145
1.17451	3.89497
1.17743	3.87532
1.17403	3.85567
1.16962	3.83623
1.16284	3.81702
1.15525	3.79809
1.14364	3.77946
1.14331	3.76116
1.13855	3.7432
1.12667	3.7256
1.11578	3.70841
1.10222	3.69169
1.08988	3.67555
1.07801	3.66007
1.06755	3.64531
1.0535	3.63138
1.03769	3.61821
1.02383	3.6058
1.01081	3.59409
0.997773	3.58306
0.991134	3.57259
0.994227	3.56271
0.998556	3.55342
1.00782	3.54475
1.02261	3.53671
1.03726	3.52927
1.0547	3.5223
1.07048	3.51579
1.08754	3.50971
1.1066	3.50406
1.12392	3.49874
1.14345	3.49363
1.16498	3.48862
1.1888	3.4836
1.21275	3.47848
1.24148	3.47318
1.27618	3.46768
1.30732	3.46194
1.33419	3.45594
1.35988	3.44968
1.37934	3.4432
1.3935	3.43641
1.40188	3.42927
1.41086	3.42162
1.41484	3.41346
1.41419	3.40479
1.4102	3.39567
1.39944	3.38609
1.38021	3.37603
1.36495	3.36542
1.34863	3.35423
1.33223	3.34247
1.31431	3.33017
1.29282	3.31728
1.26709	3.30381
1.24778	3.28968
1.22656	3.27488
1.20179	3.2595
1.17901	3.24355
1.15415	3.22703
1.13293	3.20997
1.11204	3.19243
1.1005	3.17447
1.08228	3.15613
1.06698	3.13743
1.05996	3.11841
1.05702	3.09914
1.0583	3.07966
1.07457	3.06004
1.08256	3.04037
1.09363	3.02072
1.10642	3.00106
1.12586	2.98138
1.1474	2.96165
1.16969	2.9419
1.18501	2.92224
1.20065	2.9028
1.22038	2.8836
1.24643	2.86465
1.2724	2.84597
1.29334	2.82759
1.313	2.80951
1.32927	2.79174
1.3523	2.77431
1.37396	2.75722
1.39523	2.74041
1.40888	2.72389
1.41733	2.70763
1.41928	2.69159
1.4236	2.67576
1.43089	2.66017
1.43588	2.64489
1.43834	2.63001
1.43791	2.61563
1.43883	2.60172
1.43727	2.58827
1.42639	2.57525
1.41787	2.56264
1.40833	2.55048
1.40176	2.53877
1.39817	2.5275
1.39406	2.51667
1.39192	2.50626
1.38231	2.49629
1.37939	2.48679
1.37391	2.47785
1.37366	2.46948
1.3755	2.46165
1.37616	2.45437
1.37729	2.44765
1.3735	2.44146
1.36994	2.43578
1.36157	2.43053
1.34932	2.42571
1.34013	2.42133
1.32947	2.41733
1.32781	2.41364
1.3242	2.41022
1.31626	2.40702
1.30893	2.40399
1.30187	2.40108
1.29181	2.39832
1.27883	2.3957
1.2778	2.39315
1.27116	2.39058
1.26411	2.3879
1.25457	2.38502
1.24462	2.38196
1.22981	2.37875
1.21673	2.37541
1.1985	2.37192
1.18649	2.36828
1.17474	2.36451
1.1697	2.36057
1.16297	2.35649
1.15923	2.35233
1.15092	2.34809
1.14281	2.34382
1.1363	2.33954
1.1264	2.33531
1.11834	2.33116
1.11451	2.32705
1.11005	2.32299
1.09242	2.31895
1.07456	2.31501
1.05776	2.31114
1.04209	2.30736
1.0225	2.30367
1.01772	2.30006
1.0104	2.29655
1.00957	2.29312
1.00222	2.28978
0.997343	2.28654
0.99568	2.28341
0.999267	2.28032
1.00855	2.27729
1.02348	2.27428
1.04011	2.27127
1.05852	2.26827
1.07733	2.26523
1.10024	2.26216
1.12139	2.25908
1.14676	2.25599
1.18058	2.25284
1.21481	2.2496
1.24922	2.24633
1.28929	2.24309
1.33319	2.23985
1.36895	2.23663
1.41077	2.23341
1.45083	2.23023
1.49027	2.22706
1.52726	2.22393
1.5643	2.22085
1.59528	2.21787
1.62357	2.215
1.64937	2.21225
1.66848	2.20957
1.68368	2.20695
1.70162	2.20434
1.71497	2.20176
1.72972	2.1992
1.74517	2.19662
1.75118	2.19412
1.75058	2.19168
1.74991	2.18929
1.74965	2.1869
1.74919	2.1845
1.74977	2.18208
1.74493	2.17958
1.74352	2.17696
1.74488	2.17421
1.74443	2.17131
1.73915	2.16824
1.73393	2.16498
1.72378	2.16154
1.71449	2.15792
1.7113	2.15416
1.70915	2.15021
1.70831	2.14606
1.70529	2.14173
1.70255	2.13717
1.69637	2.13239
1.6955	2.12733
1.69877	2.12203
1.70077	2.11645
1.69946	2.11058
1.69943	2.10446
1.70245	2.09806
1.70115	2.09146
1.69974	2.08468
1.69322	2.07774
1.68675	2.07067
1.67926	2.06349
1.67236	2.05619
1.66981	2.04876
1.66955	2.04116
1.677	2.03341
1.68409	2.02554
1.68489	2.01759
1.68908	2.00956
1.68866	2.00144
1.68482	1.99329
1.68548	1.98518
1.6882	1.97712
1.68647	1.96916
1.68298	1.96136
1.68067	1.95368
1.68023	1.94611
1.68646	1.93864
1.69041	1.93127
1.69412	1.92401
1.69542	1.91686
1.69166	1.90979
1.68679	1.90283
1.67956	1.896
1.6683	1.88935
1.64765	1.88287
1.63012	1.87661
1.6114	1.87057
1.58645	1.86478
1.5681	1.85927
1.56027	1.85402
1.54396	1.849
1.52789	1.84418
1.51794	1.83959
1.50895	1.83519
1.49479	1.83101
1.47524	1.82714
1.45211	1.82356
1.42567	1.82027
1.41059	1.81725
1.40134	1.81452
1.39399	1.81203
1.38674	1.80976
1.38001	1.80769
1.37514	1.80585
1.37251	1.80417
1.36437	1.80264
1.3612	1.80118
1.36296	1.79976
1.36395	1.79837
1.3566	1.79697
1.35276	1.79557
1.34789	1.79421
1.34389	1.79285
1.3394	1.79151
1.33879	1.79015
1.33804	1.78873
1.3401	1.78726
1.34444	1.7857
1.33839	1.78407
1.33127	1.7823
1.32937	1.78041
1.32221	1.7784
1.30908	1.77623
1.29263	1.77384
1.27576	1.77131
1.26293	1.76866
1.24625	1.76594
1.23009	1.76314
1.21107	1.76024
1.19543	1.75724
1.17968	1.75415
1.16488	1.7509
1.14865	1.74746
1.13335	1.74383
1.11348	1.74001
1.09484	1.73595
1.07675	1.73166
1.05515	1.72712
1.03369	1.72233
1.01094	1.71729
0.989449	1.71198
0.975704	1.70644
0.966111	1.7007
0.960123	1.69482
0.956527	1.68879
0.952028	1.68259
0.950039	1.67621
0.948171	1.6697
0.944916	1.66309
0.940605	1.6564
0.934778	1.64966
0.928327	1.64291
0.92119	1.63619
0.912223	1.6295
0.907882	1.62287
0.903081	1.61634
0.894743	1.60995
0.889695	1.60374
0.887515	1.5977
0.885923	1.59191
0.888431	1.58639
0.888099	1.58112
0.888558	1.57611
0.892231	1.57132
0.891598	1.56679
0.890599	1.56252
0.89263	1.55856
0.897133	1.5549
0.908648	1.55152
0.918861	1.54844
0.933412	1.5456
0.947283	1.54299
0.959524	1.54057
0.976377	1.5384
0.995254	1.53645
1.01309	1.53468
1.03328	1.53307
1.05415	1.5316
1.0771	1.53028
1.10263	1.52912
1.12395	1.52808
1.14489	1.52722
1.16715	1.52653
1.18624	1.52602
1.20267	1.52567
1.21923	1.52548
1.23267	1.52546
1.24283	1.52558
1.25026	1.52585
1.25276	1.52629
1.25021	1.5269
1.2499	1.52766
1.25144	1.52856
1.25109	1.52957
1.24695	1.53066
1.23913	1.53185
1.23207	1.53316
1.22335	1.53459
1.20971	1.53612
1.19855	1.53777
1.18576	1.53954
1.17217	1.54139
1.15921	1.54328
1.14739	1.54521
1.13845	1.54715
1.12774	1.54905
1.11707	1.55087
1.10783	1.55262
1.09835	1.55427
1.0937	1.55579
1.09366	1.55717
1.09469	1.55842
1.09281	1.55954
1.08757	1.56054
1.08546	1.56138
1.08825	1.56204
1.08991	1.56246
1.09592	1.56261
1.10594	1.56249
1.10999	1.56205
1.11121	1.56128
1.11494	1.56019
1.11907	1.55881
1.12114	1.55712
1.12789	1.55511
1.13795	1.55282
1.14376	1.55021
1.14781	1.54733
1.15469	1.54417
1.16244	1.54075
1.16716	1.53707
1.16937	1.53313
1.17334	1.52892
1.17797	1.52446
1.18117	1.51976
1.18096	1.51484
1.18165	1.50973
1.1796	1.50448
1.18051	1.4991
1.17981	1.49361
1.186	1.48804
1.1961	1.48241
1.20444	1.47672
1.21205	1.471
1.21476	1.46529
1.21376	1.45961
1.2126	1.45401
1.21085	1.44844
1.20248	1.44293
1.19561	1.43748
1.19359	1.43209
1.18983	1.42678
1.18833	1.42155
1.18657	1.41642
1.18261	1.41144
1.18182	1.40665
1.18175	1.40205
1.18091	1.39763
1.17804	1.39342
1.18001	1.38943
1.18266	1.38564
1.17712	1.38203
1.1728	1.37863
1.16776	1.37542
1.1623	1.37241
1.15989	1.3696
1.16413	1.36696
1.173	1.36451
1.18512	1.36227
1.19335	1.36024
1.19893	1.35842
1.21417	1.35683
1.22171	1.3555
1.2326	1.3544
1.24507	1.35352
1.25263	1.35284
1.26254	1.35235
1.27097	1.35202
1.28097	1.35185
1.28839	1.35179
1.29117	1.35186
1.29648	1.35205
1.2982	1.35231
1.30118	1.35265
1.3028	1.35308
1.30469	1.35358
1.30464	1.35415
1.30166	1.35476
1.29942	1.35538
1.30043	1.35602
1.30093	1.35667
1.29145	1.35736
1.28712	1.35802
1.27991	1.35863
1.27334	1.35916
1.26851	1.35956
1.26598	1.35983
1.26513	1.36001
1.2571	1.36008
1.25166	1.36008
1.24145	1.36001
1.2354	1.35989
1.2321	1.35973
1.22939	1.35951
1.22605	1.35921
1.225	1.35884
1.22293	1.35842
1.22736	1.35796
1.23004	1.35743
1.22892	1.35681
1.22766	1.35609
1.23065	1.35526
1.23841	1.35432
1.24481	1.35332
1.24937	1.35226
1.25442	1.3512
1.25739	1.35013
1.26104	1.34905
1.26864	1.34793
1.27129	1.3468
1.27769	1.34564
1.28088	1.34443
1.28636	1.34314
1.29266	1.34179
1.30456	1.34041
1.31367	1.33899
1.32289	1.33752
1.32264	1.33603
1.32734	1.33454
1.32999	1.33306
1.33165	1.3316
1.32637	1.33017
1.31493	1.3288
1.30826	1.32749
1.30583	1.32621
1.30509	1.32497
1.30179	1.32379
1.29445	1.32265
1.28249	1.32157
1.27368	1.32052
1.2627	1.31951
1.25129	1.3185
1.23689	1.31755
1.22157	1.31664
1.20092	1.31579
1.17995	1.315
1.15531	1.31423
1.13394	1.31347
1.1074	1.31272
1.08506	1.31196
1.06642	1.31118
1.0527	1.31035
1.04205	1.30947
1.02233	1.30853
0.999211	1.30755
0.97445	1.3065
0.949423	1.30533
0.928579	1.30404
0.911258	1.30264
0.894282	1.30116
0.883945	1.29963
0.875432	1.29806
0.868594	1.29643
0.861407	1.29474
0.856878	1.29296
0.857467	1.29106
0.86454	1.28909
0.873319	1.28707
0.883671	1.28497
0.896228	1.28286
0.90556	1.28081
0.916346	1.2788
0.929317	1.27684
0.948365	1.27493
0.967641	1.27308
0.987333	1.2713
1.00693	1.26966
1.02569	1.26815
1.04539	1.26679
1.06405	1.26557
1.0931	1.26447
1.12227	1.2635
1.14941	1.2627
1.17664	1.26203
1.20139	1.26151
1.21884	1.26115
1.23462	1.26093
1.24788	1.26086
1.26017	1.26092
1.26938	1.26111
1.27458	1.26136
1.27257	1.26171
1.26609	1.26214
1.25918	1.26264
1.254	1.26317
1.25068	1.26377
1.25223	1.2644
1.24615	1.2651
1.23846	1.26581
1.23066	1.26653
1.21004	1.26725
1.18769	1.26798
1.16671	1.26869
1.14529	1.26941
1.12845	1.27015
1.11408	1.27092
1.09649	1.27172
1.0791	1.27255
1.06071	1.2734
1.03478	1.27424
1.01252	1.27506
0.994912	1.27585
0.981501	1.27659
0.968043	1.27732
0.952085	1.27805
0.935951	1.27879
0.913026	1.27949
0.898591	1.28014
0.884315	1.28074
0.866773	1.28125
0.850208	1.28162
0.834563	1.28186
0.824727	1.28196
0.819791	1.28191
0.810851	1.2817
0.803159	1.28133
0.798643	1.28074
0.79694	1.27995
0.797255	1.27893
0.805825	1.27772
0.814964	1.27633
0.823733	1.27475
0.830184	1.27295
0.84057	1.27096
0.853027	1.26878
0.8657	1.26641
0.886136	1.26386
0.904999	1.26114
0.928847	1.25826
0.960968	1.25528
0.993078	1.25226
1.02412	1.24919
1.05104	1.24611
1.07576	1.24304
1.10753	1.23998
1.13946	1.23693
1.17218	1.23392
1.19777	1.23096
1.22574	1.22806
1.254	1.22522
1.27567	1.22245
1.29823	1.21976
1.31941	1.21721
1.32831	1.21474
1.33407	1.21236
1.3376	1.21007
1.33615	1.20787
1.33187	1.20577
1.32058	1.20379
1.30205	1.20194
1.28452	1.20017
1.26279	1.19849
1.23972	1.19689
1.21555	1.19533
1.18607	1.19381
1.15013	1.19232
1.11624	1.19086
1.08826	1.18945
1.05371	1.1881
1.01686	1.18685
0.983515	1.18569
0.947539	1.18458
0.912513	1.18354
0.885839	1.18258
0.861526	1.1817
0.838864	1.18089
0.818093	1.18019
0.800433	1.17958
0.787705	1.17904
0.777032	1.17855
0.763519	1.17811
0.754715	1.17773
0.744498	1.17743
0.733617	1.17722
0.722095	1.1771
0.714044	1.17712
0.702757	1.17724
0.690768	1.17748
0.68199	1.1778
0.675235	1.17818
0.67075	1.17859
0.66778	1.17905
0.666011	1.17953
0.665205	1.18
0.663443	1.18049
0.661416	1.18099
0.661798	1.18145
0.660392	1.18189
0.654876	1.1823
0.652653	1.18268
0.650908	1.18303
0.648202	1.1833
0.646939	1.18351
0.648001	1.18365
0.649691	1.18373
0.653205	1.18374
0.658764	1.18373
0.665615	1.18365
0.672572	1.18348
0.680608	1.18326
0.68972	1.18299
0.706944	1.1827
0.722363	1.18241
0.736563	1.18213
0.75115	1.18185
0.766566	1.18161
0.776408	1.18139
0.782878	1.1812
0.792581	1.18103
0.799535	1.18086
0.806626	1.1807
0.815426	1.18058
0.825296	1.18049
0.832951	1.18044
0.838727	1.1804
0.846397	1.18034
0.848696	1.18023
0.847282	1.18012
0.846487	1.18002
0.846534	1.17995
0.843771	1.1799
0.834871	1.17983
0.826147	1.17973
0.817904	1.17958
0.810731	1.17937
0.803253	1.17908
0.798446	1.17872
0.80087	1.17827
0.801973	1.17776
0.804016	1.17719
0.806683	1.17655
0.800826	1.17586
0.794164	1.17511
0.787014	1.17429
0.781923	1.17339
0.775284	1.17244
0.773194	1.17143
0.779193	1.17036
0.784042	1.16923
0.787286	1.16803
0.791691	1.16678
0.7944	1.16549
0.796339	1.16414
0.805683	1.16274
0.815785	1.16127
0.829589	1.15971
0.839159	1.15807
0.848631	1.15635
0.853834	1.15455
0.857219	1.15268
0.861049	1.15072
0.872856	1.14862
0.885636	1.14638
0.898651	1.14403
0.911047	1.14157
0.92314	1.13899
0.933425	1.1363
0.93749	1.1335
0.943986	1.13059
0.95136	1.12757
0.958942	1.12447
0.967598	1.12128
0.98018	1.11803
0.986959	1.11473
0.985253	1.11142
0.983463	1.10813
0.982948	1.10485
0.981194	1.10159
0.982776	1.09832
0.990374	1.09504
0.995162	1.09178
0.999964	1.0886
1.00536	1.08549
1.01039	1.08244
1.01728	1.07947
1.0231	1.07658
1.02779	1.07376
1.03274	1.071
1.03488	1.0683
1.03307	1.06568
1.03175	1.06309
1.03032	1.06053
1.03073	1.05802
1.03054	1.05557
1.03644	1.05318
1.03588	1.05085
1.03392	1.04861
1.03602	1.04647
1.03728	1.04444
1.03289	1.04255
1.03058	1.04077
1.02704	1.03909
1.01813	1.03751
1.00936	1.03604
1.00204	1.0347
0.994612	1.03348
0.984801	1.0324
0.97591	1.03149
0.969816	1.03072
0.9668	1.03009
0.964821	1.02963
0.96394	1.02936
0.959234	1.02926
0.954217	1.0293
0.955561	1.02949
0.959781	1.02981
0.96086	1.03024
0.959592	1.03076
0.959614	1.03139
0.959651	1.0321
0.960867	1.0329
0.959941	1.03379
0.96293	1.03473
0.963697	1.03571
0.97128	1.0367
0.983549	1.03769
1.00103	1.03867
1.01768	1.03964
1.0339	1.04061
1.05174	1.04157
1.06794	1.04247
1.08416	1.04331
1.08956	1.0441
1.09473	1.04484
1.09337	1.04553
1.09191	1.04616
1.09494	1.04675
1.09457	1.04732
1.09394	1.04787
1.09692	1.04838
1.09958	1.04887
1.10575	1.04935
1.11108	1.04982
1.11976	1.05025
1.11937	1.05067
1.11278	1.05107
1.10879	1.05142
1.10199	1.0517
1.09267	1.0519
1.08072	1.052
1.07046	1.05205
1.05935	1.05202
1.05892	1.05192
1.05862	1.05176
1.05847	1.05152
1.06	1.05117
1.06288	1.05071
1.06457	1.05011
1.06801	1.04938
1.06806	1.04852
1.06867	1.04755
1.06798	1.04646
1.06532	1.04525
1.05969	1.04395
1.05331	1.04258
1.05087	1.04114
1.04899	1.03968
1.05168	1.0382
1.0574	1.03672
1.06574	1.03524
1.07393	1.03373
1.08294	1.03221
1.09407	1.03069
1.10847	1.0292
1.12077	1.02773
1.13204	1.02635
1.14037	1.02507
1.15281	1.02387
1.16555	1.02278
1.17771	1.02178
1.18605	1.02087
1.19464	1.02006
1.20463	1.01937
1.21677	1.01878
1.22907	1.01827
1.24069	1.01783
1.24678	1.01744
1.24729	1.01711
1.24631	1.01682
1.24226	1.01656
1.23722	1.01635
1.2309	1.01616
1.22205	1.01596
1.20534	1.01577
1.19391	1.01557
1.17588	1.01533
1.15985	1.01507
1.13989	1.01478
1.11828	1.01446
1.1013	1.01412
1.08669	1.01374
1.07998	1.01332
1.07338	1.01284
1.06785	1.0123
1.06206	1.01171
1.05964	1.01109
1.05811	1.01045
1.06136	1.00979
1.06504	1.00908
1.07305	1.00834
1.08602	1.00755
1.09786	1.0067
1.11049	1.00582
1.13078	1.00487
1.14972	1.00383
1.17514	1.0027
1.20069	1.00146
1.22958	1.00014
1.25977	0.998722
1.28546	0.997207
1.31112	0.995619
1.32906	0.993959
1.34637	0.992231
1.36496	0.990418
1.3829	0.988507
1.39645	0.986494
1.40589	0.98435
1.40697	0.982084
1.40235	0.979721
1.39444	0.977257
1.38435	0.974706
1.37685	0.972079
1.37474	0.969343
1.36499	0.966518
1.35321	0.963658
1.33728	0.960761
1.3208	0.957828
1.30089	0.954848
1.29183	0.951828
1.28808	0.948795
1.2852	0.945748
1.28163	0.942689
1.2754	0.939641
1.26797	0.936617
1.2645	0.933635
1.26121	0.930686
1.26004	0.927798
1.26687	0.924973
1.27946	0.922214
1.29345	0.919529
1.30637	0.916934
1.31736	0.914449
1.32059	0.912103
1.32693	0.909901
1.3325	0.907825
1.34527	0.905866
1.36246	0.904036
1.381	0.902346
1.37849	0.900811
1.37505	0.899403
1.37106	0.898118
1.36845	0.896968
1.36913	0.895943
1.36709	0.895059
1.36183	0.894329
1.35289	0.893756
1.34673	0.893339
1.34162	0.893062
1.33633	0.89292
1.32894	0.892903
1.31921	0.893008
1.30965	0.893235
1.29823	0.893561
1.28888	0.894007
1.27909	0.89456
1.26378	0.895198
1.23742	0.895923
1.21139	0.896717
1.19439	0.89757
1.17433	0.898493
1.1542	0.899485
1.13296	0.900529
1.11282	0.901638
1.09462	0.902808
1.07549	0.904014
1.0594	0.905264
1.04738	0.906549
1.03234	0.907889
1.01458	0.909277
0.999456	0.910703
0.984276	0.912153
0.972945	0.913624
0.964016	0.915106
0.955617	0.916579
0.947611	0.918039
0.945041	0.91951
0.950029	0.920968
0.958278	0.922415
0.966501	0.923829
0.977019	0.925202
0.987978	0.926546
0.998725	0.92783
1.01567	0.929013
1.03084	0.930092
1.04829	0.931067
1.06643	0.93195
1.08094	0.932728
1.09643	0.933388
1.11401	0.933925
1.12379	0.934373
1.13571	0.934737
1.14325	0.935018
1.14799	0.935219
1.15117	0.935329
1.1553	0.935352
1.15516	0.935284
1.15579	0.935127
1.15368	0.934896
1.151	0.934594
1.15445	0.934222
1.1571	0.933774
1.15813	0.933251
1.1506	0.932673
1.14419	0.932046
1.13534	0.931387
1.11977	0.930682
1.10091	0.929951
1.08191	0.929227
1.06169	0.928549
1.04675	0.927904
1.03091	0.927271
1.01572	0.926631
1.00398	0.925969
0.991719	0.925286
0.978534	0.924577
0.968716	0.923848
0.954852	0.923108
0.942433	0.922345
0.93046	0.921574
0.910322	0.920791
0.888785	0.91999
0.870833	0.919185
0.853046	0.918379
0.836847	0.917566
0.821726	0.916748
0.81652	0.915921
0.814189	0.915088
0.812555	0.914231
0.811289	0.913345
0.804143	0.912417
0.796591	0.911461
0.791272	0.910505
0.789946	0.909576
0.788942	0.908672
0.791542	0.907799
0.795496	0.906937
0.805929	0.906106
0.817407	0.905323
0.82945	0.904589
0.841004	0.903901
0.853193	0.903274
0.868125	0.902714
0.885364	0.902241
0.903078	0.90187
0.921574	0.901592
0.936746	0.90141
0.952405	0.901316
0.968646	0.901298
0.987494	0.901345
1.01302	0.901476
1.03825	0.901692
1.06074	0.901984
1.08144	0.902357
1.1002	0.902821
1.11614	0.903355
1.12559	0.903977
1.13118	0.90465
1.13491	0.90535
1.13294	0.906031
1.12751	0.906692
1.12063	0.907329
1.10978	0.90797
1.09902	0.908597
1.08835	0.90919
1.07783	0.909771
1.06763	0.910333
1.05487	0.910879
1.03737	0.911419
1.01656	0.911924
0.999015	0.912384
0.980369	0.912787
0.963496	0.913136
0.938784	0.913413
0.916236	0.913619
0.89469	0.913758
0.874473	0.91383
0.853768	0.913849
0.833106	0.913823
0.81654	0.913787
0.803059	0.913757
0.791976	0.913701
0.780688	0.913601
0.771697	0.913462
0.761793	0.913279
0.749613	0.913049
0.732974	0.912765
0.718609	0.912411
0.708977	0.911986
0.701851	0.91151
0.693052	0.910979
0.685805	0.910396
0.679167	0.909768
0.678173	0.909088
0.680751	0.908346
0.685073	0.907557
0.695031	0.906711
0.705427	0.905813
0.719582	0.904874
0.734741	0.903887
0.749476	0.902834
0.765114	0.901719
0.780677	0.900542
0.792957	0.899277
0.804245	0.89791
0.818232	0.896445
0.833409	0.894906
0.845745	0.893326
0.858802	0.891694
0.87779	0.890024
0.898526	0.888324
0.917723	0.886595
0.93492	0.884798
0.951732	0.882956
0.964607	0.881081
0.975045	0.879151
0.983287	0.877158
0.987345	0.875095
0.990096	0.872954
0.992545	0.8708
0.996817	0.868648
0.999846	0.866514
1.00099	0.864396
1.00295	0.862321
1.00852	0.860303
1.01378	0.858344
1.02106	0.856418
1.03195	0.854515
1.03984	0.852634
1.04189	0.851596
1.04426	0.850546
1.04619	0.849493
1.03884	0.84845
1.03196	0.847409
1.02766	0.846386
1.02548	0.845391
1.01692	0.84445
1.01449	0.843571
1.01103	0.842747
1.00835	0.841958
1.00374	0.841199
0.998112	0.840456
0.99538	0.839711
0.99234	0.838949
0.988301	0.838175
0.983021	0.837368
0.978232	0.836531
0.971347	0.835663
0.965816	0.834756
0.958457	0.833841
0.945337	0.832917
0.932971	0.831979
0.935702	0.831031
0.939247	0.830097
