# Supplementary material for: Dynamic m6A methylation facilitates mRNA triaging to stress granules
Source: Life Sci Alliance. 2018 Jul 3;1(4):e201800113. doi: 10.26508/lsa.201800113 (PMC6238392; doi:10.26508/lsa.201800113)
Supplement: Supplementary file 17 [file LSA-2018-00113_SdataF15.xlsx]

## Sheet: Figure 3D
Examples of profiles
TUB4B [RPF counts]	PDCD2 [RPF counts]
0	0
0	0
0	0
0	0
0	0
0	0
0	0
0	0
0	0
0	0
0	0
0	0
0	0
0	0
0	0
0	0
0	0
0	0
0	0
0	0
0	0
0	0
0	0
0	0
0	0
0	0
0	0
0	0
0	0
0	0
0	0
0	0
0	0
0	0
0	0
0	0
0	0
0	0
0	0
0	0
0	0
0	0
0	0
0	0
0	0
0	0
0	1
0	0
0	1
0	0
0	0
0	5
0	9
0	4
0	0
0	0
0	10
0	1
0	5
0	2
0	2
2	1
0	1
1	0
0	3
2	3
0	4
2	0
1	1
3	1
2	1
4	1
2	1
6	2
4	0
1	1
2	0
1	0
2	1
4	1
5	0
8	0
3	0
3	1
10	0
5	1
2	0
6	0
5	0
2	0
6	1
5	1
0	0
0	0
1	0
0	0
2	0
2	0
3	0
9	0
1	0
2	0
1	0
0	0
0	0
0	0
0	0
0	3
0	1
0	1
1	3
0	0
0	0
0	0
0	0
0	0
0	0
0	0
0	0
0	0
0	0
0	0
0	0
0	0
0	1
0	0
0	0
0	0
0	0
0	0
0	0
2	0
0	0
1	0
5	0
1	0
3	0
2	0
2	0
10	0
1	0
4	0
1	1
3	0
1	0
3	0
12	0
5	0
3	0
9	1
12	0
12	0
2	0
4	0
14	0
6	0
8	0
5	1
3	0
6	0
6	1
2	1
2	0
0	0
0	0
1	0
1	0
4	1
5	0
8	1
4	0
7	0
16	2
4	0
1	0
0	0
0	0
1	0
2	0
3	0
1	0
4	0
4	0
6	0
6	0
1	0
7	0
1	0
1	0
2	0
0	0
1	0
1	0
0	0
0	0
0	0
0	0
2	0
0	0
1	0
2	0
0	0
0	0
1	0
1	0
0	0
0	3
2	0
1	0
0	0
1	0
1	0
2	0
3	0
1	0
1	0
0	0
0	0
0	0
0	0
0	0
0	0
0	0
0	0
1	0
0	0
0	0
0	0
0	0
0	0
0	0
0	0
0	0
0	0
0	0
0	0
0	0
1	0
0	0
2	0
1	0
1	0
0	0
1	0
1	0
1	0
0	0
1	0
2	0
0	0
0	0
0	0
0	0
1	0
1	0
0	0
0	0
1	0
0	0
0	1
0	0
0	0
0	0
0	0
0	0
2	0
1	0
3	0
4	0
1	1
0	0
1	0
1	0
2	0
1	0
1	0
3	0
7	0
7	0
1	0
7	0
3	0
6	0
13	0
3	0
12	0
1	0
0	0
0	0
0	0
0	0
0	0
0	0
0	0
0	0
0	0
0	0
0	0
1	0
0	0
0	0
0	0
1	0
0	0
0	0
0	0
0	0
0	0
0	0
0	1
0	0
1	0
1	0
3	0
0	0
1	0
1	0
0	0
0	0
0	0
0	0
0	0
0	0
0	0
4	0
2	0
3	0
2	0
0	0
0	0
0	0
0	0
0	0
0	0
0	0
0	0
0	0
0	0
0	0
0	0
0	0
0	0
0	0
0	0
0	0
0	0
0	0
0	0
0	0
0	0
0	0
4	0
3	0
1	0
2	0
2	0
1	0
1	0
2	0
2	0
2	0
2	0
0	0
2	0
1	0
0	0
1	0
1	0
0	0
0	0
1	0
0	0
0	0
0	0
2	0
0	0
4	0
0	0
1	0
2	0
3	0
1	0
0	0
3	0
1	0
0	0
1	0
3	0
5	0
1	0
5	0
5	0
3	0
5	0
0	0
0	0
1	0
0	0
1	0
5	0
1	0
1	0
2	0
0	0
1	0
0	0
0	0
0	0
1	0
0	0
0	0
0	0
0	0
1	0
0	0
0	0
0	0
0	0
1	0
0	0
0	0
1	0
0	0
1	0
1	0
0	0
0	0
0	0
0	0
0	0
0	0
0	0
0	0
0	0
0	0
1	0
0	0
0	0
0	0
0	0
0	0
0	0
0	0
0	0
0	0
0	0
0	0
0	0
0	0
0	0
0	0
0	0
0	0
0	0
0	0
0	0
0	0
0	0
0	0
0	0
0	0
0	0
0	0
0	0
0	0
0	0
0	0
0	0
0	0
0	0
0	0
0	0
0	0
1	0
1	0
0	0
0	0
0	0
0	0
0	0
0	0
0	0
0	0
0	0
1	0
0	0
1	0
0	0
0	0
0	0
0	0
0	0
0	0
0	0
0	0
2	0
0	0
0	0
0	0
0	0
0	0
0	0
0	0
0	1
2	0
0	0
0	0
0	0
0	0
0	0
0	0
0	0
0	0
0	0
0	0
0	0
0	0
0	0
0	0
0	0
0	0
0	0
0	0
0	0
0	1
0	0
0	0
0	0
1	0
0	0
0	0
0	0
2	0
1	0
0	0
0	0
0	0
0	0
0	0
0	0
0	0
3	0
0	0
4	0
0	0
2	0
1	0
1	1
2	0
0	0
1	0
0	0
1	0
1	1
0	0
1	0
0	0
0	0
1	0
0	0
0	0
0	0
0	0
0	0
0	0
0	0
0	0
0	0
0	0
0	0
0	0
0	0
0	0
0	0
0	0
0	0
0	0
0	0
0	0
1	0
0	0
0	0
0	0
0	0
0	0
0	0
1	0
2	0
2	0
0	0
3	0
6	0
0	0
3	0
1	0
2	0
0	0
0	0
0	0
0	0
0	0
0	0
2	0
0	0
1	0
0	0
1	0
0	0
0	0
0	0
0	0
0	0
0	0
0	0
0	0
0	0
0	0
0	0
0	0
0	0
0	0
0	0
0	0
0	0
0	0
0	0
1	0
1	0
3	0
0	0
0	0
1	0
1	0
2	0
1	0
2	0
0	0
0	0
0	0
1	0
0	0
0	0
9	0
1	0
0	0
1	0
0	0
0	0
1	0
1	0
0	0
1	0
1	0
0	0
2	0
3	0
1	0
2	0
1	0
0	0
0	0
0	0
1	0
1	0
1	0
1	0
0	0
1	0
0	0
1	0
0	0
1	0
0	0
0	0
0	0
1	0
0	0
0	0
0	0
1	0
0	0
0	0
0	0
0	0
0	0
0	0
1	0
1	0
0	0
0	0
0	0
0	0
0	0
0	0
0	0
0	0
0	0
0	0
0	0
1	0
0	0
0	0
0	0
0	0
0	0
0	0
0	0
0	0
0	0
0	0
0	0
0	0
0	0
0	0
0	0
2	0
0	0
0	0
5	0
1	0
0	0
1	0
1	0
2	0
4	0
1	0
7	0
2	0
3	0
2	0
1	0
0	0
0	0
0	0
0	0
0	0
0	0
0	0
0	0
0	0
0	0
0	0
0	0
0	0
3	0
0	0
0	0
0	0
0	0
0	0
0	0
1	0
0	0
0	0
0	0
0	0
0	0
0	0
0	0
0	0
0	0
1	0
1	0
1	0
0	0
0	0
0	0
0	0
1	0
0	0
0	0
0	0
0	0
0	0
0	0
1	0
0	0
1	0
0	0
1	0
1	0
0	0
1	0
1	0
0	0
0	0
0	0
0	0
0	0
0	0
0	0
0	0
4	0
2	0
1	0
0	0
1	0
0	0
0	0
0	0
0	0
0	0
0	0
0	0
0	0
1	0
0	0
3	0
0	0
0	0
0	0
4	0
0	0
0	0
2	0
1	0
2	0
0	0
0	0
0	0
1	0
0	0
1	0
0	0
0	0
0	0
1	0
0	0
0	0
1	0
0	0
0	0
0	0
0	0
0	0
0	0
0	0
0	0
0	0
0	0
0	0
1	0
0	0
0	0
0	0
0	0
0	0
0	0
0	1
0	0
0	0
0	0
0	0
0	0
0	0
0	0
0	0
0	0
0	0
0	0
0	0
0	0
0	0
1	0
0	0
0	0
0	0
0	0
0	0
0	0
1	0
0	0
0	0
0	0
0	0
0	0
0	0
0	0
0	0
0	0
0	0
0	0
0	0
0	0
0	0
1	0
0	0
1	0
0	0
0	1
0	2
0	0
0	0
0	0
0	0
0	0
0	0
1	0
0	0
0	0
2	0
0	0
0	0
1	0
0	0
1	0
1	0
0	0
0	0
0	0
2	0
0	0
0	0
0	0
0	0
0	0
1	0
0	0
0	0
0	0
0	0
1	0
0	0
1	0
0	0
0	0
0	0
0	0
0	0
0	0
0	0
1	0
0	0
0	0
1	0
0	0
0	0
0	0
0	0
0	0
0	0
0	0
1	0
0	0
1	0
0	0
0	0
1	0
1	0
0	0
0	0
0	0
0	0
0	0
0	0
0	0
0	1
1	0
1	0
0	0
2	0
0	0
2	0
0	0
0	0
0	0
1	0
1	0
0	0
2	0
2	0
0	0
2	0
0	0
1	0
0	0
0	0
0	0
2	0
0	0
0	0
1	0
1	0
0	0
1	0
0	0
1	0
0	0
0	0
0	0
5	0
0	0
1	0
0	0
0	0
1	0
1	0
0	0
0	0
0	0
0	0
0	0
0	0
0	0
0	0
0	0
0	0
0	0
0	0
0	1
0	0
0	0
0	0
0	0
0	0
0	0
0	0
0	0
0	0
0	0
0	0
0	0
0	0
0	0
0	0
0	0
1	0
0	0
0	0
0	0
1	0
0	0
0	0
0	0
0	0
0	0
0	0
0	0
0	0
1	0
0	0
3	0
0	0
0	0
1	0
0	0
0	0
0	0
0	0
0	0
0	0
0	0
0	0
0	0
0	0
0	0
0	0
0	0
0	0
0	0
0	0
0	0
0	0
0	0
0	0
0	0
0	0
0	0
0	0
0	0
0	0
0	0
0	0
0	0
0	0
0	0
0	1
0	0
0	0
0	0
0	0
0	0
0	0
0	0
0	0
0
0
0
0
0
0
0
2
1
0
1
0
0
0
0
2
0
1
1
1
0
0
0
0
0
1
0
0
1
0
1
0
2
0
3
3
6
8
4
0
2
1
0
0
1
1
0
0
0
0
0
0
0
0
0
0
0
0
0
0
0
0
0
0
0
0
1
0
0
0
0
0
0
0
0
0
0
0
0
0
0
0
0
0
0
0
0
0
0
0
2
4
0
0
0
0
0
0
0
0
0
0
0
0
0
0
0
0
0
0
2
0
0
0
0
0
0
0
1
0
0
1
0
0
0
0
0
2
0
0
0
0
0
1
0
0
0
0
0
0
0
0
0
0
0
0
1
0
0
0
0
0
0
0
0
0
0
0
0
0
0
0
0
1
1
0
0
0
0
0
0
0
2
0
0
0
0
0
0
0
1
0
0
0
0
0
0
0
0
1
0
0
0
0
1
0
1
0
0
0
0
1
0
0
0
0
0
0
1
1
3
1
0
0
0
0
0
0
0
0
2
2
2
3
1
0
1
0
1
1
0
0
0
0
0
0
1
0
0
0
0
0
2
0
0
0
1
0
0
0
0
0
0
1
3
3
0
3
1
0
0
1
1
4
2
5
0
1
0
0
0
0
0
1
0
0
0
0
0
0
0
1
0
0
0
0
0
0
0
0
0
1
0
0
2
0
0
3
3
1
0
0
0
0
0
0
0
0
0
0
0
0
0
