# Supplementary material for: Dynamic m6A methylation facilitates mRNA triaging to stress granules
Source: Life Sci Alliance. 2018 Jul 3;1(4):e201800113. doi: 10.26508/lsa.201800113 (PMC6238392; doi:10.26508/lsa.201800113)
Supplement: Supplementary file 19 [file LSA-2018-00113_SdataF17.xlsx]

## Sheet: Figure S4B
YTHDF3 reader knockdown
	Fold change mean
Scramble	2.21
10 nM siRNA	0.45
50 nM siRNA	-0.58
100 nM siRNA	-0.98
Replicates	2
